# Supplementary material for: Sequencing and De Novo Assembly of the Western Tarnished Plant Bug (Lygus hesperus) Transcriptome
Source: PLoS One. 2013 Jan 24;8(1):e55105. doi: 10.1371/journal.pone.0055105 (PMC3554660; doi:10.1371/journal.pone.0055105)
Supplement: Table S6 — Results of a Pfam domain search using L. hesperus transcriptomic sequences. (XLSX) [file pone.0055105.s013.xlsx]

## Sheet: 454Isotigs_pfams
Table S6. Results of a Pfam domain search using L. hesperus transcriptomic sequences.
query name	accession	E-value	score	bias	E-value	score	bias	exp	reg	clu	ov	env	dom	rep	inc	description of target
isotig00001	PF00025.15	2e-16	59.4	0.4	2.9e-16	58.9	0.3	1.1	1	0	0	1	1	1	1	ADP-ribosylation factor family
isotig00001	PF12706.1	0.00055	19.2	0	0.00075	18.8	0	1.2	1	0	0	1	1	1	1	Beta-lactamase superfamily domain
isotig00001	PF00009.21	1.1e-07	31.2	1.2	4.1e-07	29.3	0.6	2	1	1	0	1	1	1	1	Elongation factor Tu GTP binding domain
isotig00001	PF10662.3	0.00043	19.5	0.3	0.014	14.6	0.2	2.4	1	1	0	1	1	1	1	Ethanolamine utilisation - propanediol utilisation
isotig00001	PF02421.12	3.5e-05	22.8	3.1	0.00035	19.5	2.2	1.9	1	1	0	1	1	1	1	Ferrous iron transport protein B
isotig00001	PF04670.6	5.1e-06	25.5	0.3	7.2e-06	25	0.2	1.4	1	1	0	1	1	1	1	Gtr1/RagA G protein conserved region
isotig00001	PF00753.21	8.8e-25	87.2	0.1	2.2e-24	85.9	0.1	1.6	1	1	0	1	1	1	1	Metallo-beta-lactamase superfamily
isotig00001	PF08477.7	6.9e-20	71.4	0.8	2.8e-19	69.5	0	1.9	2	0	0	2	2	1	1	Miro-like protein
isotig00001	PF00071.16	3.5e-60	201.7	0.7	4.3e-60	201.5	0.5	1.1	1	0	0	1	1	1	1	Ras family
isotig00002	PF00025.15	2e-16	59.4	0.4	2.9e-16	58.9	0.3	1.1	1	0	0	1	1	1	1	ADP-ribosylation factor family
isotig00002	PF12706.1	0.00046	19.5	0	0.00062	19.1	0	1.2	1	0	0	1	1	1	1	Beta-lactamase superfamily domain
isotig00002	PF00009.21	1.1e-07	31.2	1.2	4.1e-07	29.3	0.6	2	1	1	0	1	1	1	1	Elongation factor Tu GTP binding domain
isotig00002	PF10662.3	0.00043	19.5	0.3	0.014	14.6	0.2	2.4	1	1	0	1	1	1	1	Ethanolamine utilisation - propanediol utilisation
isotig00002	PF02421.12	3.5e-05	22.8	3.1	0.00035	19.5	2.2	1.9	1	1	0	1	1	1	1	Ferrous iron transport protein B
isotig00002	PF04670.6	5.1e-06	25.5	0.3	7.2e-06	25	0.2	1.4	1	1	0	1	1	1	1	Gtr1/RagA G protein conserved region
isotig00002	PF00753.21	7e-25	87.5	0.1	1.8e-24	86.2	0.1	1.6	1	1	0	1	1	1	1	Metallo-beta-lactamase superfamily
isotig00002	PF08477.7	6.9e-20	71.4	0.8	2.8e-19	69.5	0	1.9	2	0	0	2	2	1	1	Miro-like protein
isotig00002	PF00071.16	3.5e-60	201.7	0.7	4.3e-60	201.5	0.5	1.1	1	0	0	1	1	1	1	Ras family
isotig00003	PF12706.1	0.00055	19.2	0	0.00075	18.8	0	1.2	1	0	0	1	1	1	1	Beta-lactamase superfamily domain
isotig00003	PF12681.1	2.9e-07	30.7	0	5.5e-07	29.8	0	1.5	2	0	0	2	2	1	1	Glyoxalase-like domain
isotig00003	PF00753.21	8.8e-25	87.2	0.1	2.2e-24	85.9	0.1	1.6	1	1	0	1	1	1	1	Metallo-beta-lactamase superfamily
isotig00004	PF00025.15	2e-16	59.4	0.4	2.9e-16	58.9	0.3	1.1	1	0	0	1	1	1	1	ADP-ribosylation factor family
isotig00004	PF00009.21	1.1e-07	31.2	1.2	4.1e-07	29.3	0.6	2	1	1	0	1	1	1	1	Elongation factor Tu GTP binding domain
isotig00004	PF10662.3	0.00043	19.5	0.3	0.014	14.6	0.2	2.4	1	1	0	1	1	1	1	Ethanolamine utilisation - propanediol utilisation
isotig00004	PF02421.12	3.5e-05	22.8	3.1	0.00035	19.5	2.2	1.9	1	1	0	1	1	1	1	Ferrous iron transport protein B
isotig00004	PF04670.6	5.1e-06	25.5	0.3	7.2e-06	25	0.2	1.4	1	1	0	1	1	1	1	Gtr1/RagA G protein conserved region
isotig00004	PF08477.7	6.9e-20	71.4	0.8	2.8e-19	69.5	0	1.9	2	0	0	2	2	1	1	Miro-like protein
isotig00004	PF00071.16	3.5e-60	201.7	0.7	4.3e-60	201.5	0.5	1.1	1	0	0	1	1	1	1	Ras family
isotig00005	PF12706.1	0.00046	19.5	0	0.00062	19.1	0	1.2	1	0	0	1	1	1	1	Beta-lactamase superfamily domain
isotig00005	PF12681.1	2.9e-07	30.7	0	5.5e-07	29.8	0	1.5	2	0	0	2	2	1	1	Glyoxalase-like domain
isotig00005	PF00753.21	7e-25	87.5	0.1	1.8e-24	86.2	0.1	1.6	1	1	0	1	1	1	1	Metallo-beta-lactamase superfamily
isotig00006	PF00025.15	2e-16	59.4	0.4	2.9e-16	58.9	0.3	1.1	1	0	0	1	1	1	1	ADP-ribosylation factor family
isotig00006	PF00009.21	1.1e-07	31.2	1.2	4.1e-07	29.3	0.6	2	1	1	0	1	1	1	1	Elongation factor Tu GTP binding domain
isotig00006	PF10662.3	0.00043	19.5	0.3	0.014	14.6	0.2	2.4	1	1	0	1	1	1	1	Ethanolamine utilisation - propanediol utilisation
isotig00006	PF02421.12	3.5e-05	22.8	3.1	0.00035	19.5	2.2	1.9	1	1	0	1	1	1	1	Ferrous iron transport protein B
isotig00006	PF04670.6	5.1e-06	25.5	0.3	7.2e-06	25	0.2	1.4	1	1	0	1	1	1	1	Gtr1/RagA G protein conserved region
isotig00006	PF08477.7	6.9e-20	71.4	0.8	2.8e-19	69.5	0	1.9	2	0	0	2	2	1	1	Miro-like protein
isotig00006	PF00071.16	3.5e-60	201.7	0.7	4.3e-60	201.5	0.5	1.1	1	0	0	1	1	1	1	Ras family
isotig00007	PF12706.1	0.00055	19.2	0	0.00075	18.8	0	1.2	1	0	0	1	1	1	1	Beta-lactamase superfamily domain
isotig00007	PF00753.21	8.8e-25	87.2	0.1	2.2e-24	85.9	0.1	1.6	1	1	0	1	1	1	1	Metallo-beta-lactamase superfamily
isotig00007	PF10248.3	7.4e-51	171.9	6.5	6.1e-50	168.9	4.5	2.1	1	1	0	1	1	1	1	Myelodysplasia-myeloid leukemia factor 1-interacting protein
isotig00008	PF12706.1	0.00055	19.2	0	0.00075	18.8	0	1.2	1	0	0	1	1	1	1	Beta-lactamase superfamily domain
isotig00008	PF00753.21	8.8e-25	87.2	0.1	2.2e-24	85.9	0.1	1.6	1	1	0	1	1	1	1	Metallo-beta-lactamase superfamily
isotig00008	PF10248.3	7.4e-51	171.9	6.5	6.1e-50	168.9	4.5	2.1	1	1	0	1	1	1	1	Myelodysplasia-myeloid leukemia factor 1-interacting protein
isotig00009	PF12681.1	2.9e-07	30.7	0	5.5e-07	29.8	0	1.5	2	0	0	2	2	1	1	Glyoxalase-like domain
isotig00010	PF12706.1	0.00055	19.2	0	0.00075	18.8	0	1.2	1	0	0	1	1	1	1	Beta-lactamase superfamily domain
isotig00010	PF00753.21	8.8e-25	87.2	0.1	2.2e-24	85.9	0.1	1.6	1	1	0	1	1	1	1	Metallo-beta-lactamase superfamily
isotig00010	PF10248.3	9.6e-51	171.5	6.7	7.9e-50	168.6	4.6	2.1	1	1	0	1	1	1	1	Myelodysplasia-myeloid leukemia factor 1-interacting protein
isotig00011	PF12706.1	0.00055	19.2	0	0.00075	18.8	0	1.2	1	0	0	1	1	1	1	Beta-lactamase superfamily domain
isotig00011	PF00753.21	8.8e-25	87.2	0.1	2.2e-24	85.9	0.1	1.6	1	1	0	1	1	1	1	Metallo-beta-lactamase superfamily
isotig00011	PF10248.3	9.6e-51	171.5	6.7	7.9e-50	168.6	4.6	2.1	1	1	0	1	1	1	1	Myelodysplasia-myeloid leukemia factor 1-interacting protein
isotig00012	PF12706.1	0.00055	19.2	0	0.00075	18.8	0	1.2	1	0	0	1	1	1	1	Beta-lactamase superfamily domain
isotig00012	PF00753.21	8.8e-25	87.2	0.1	2.2e-24	85.9	0.1	1.6	1	1	0	1	1	1	1	Metallo-beta-lactamase superfamily
isotig00012	PF10248.3	6.5e-51	172.1	7.4	5.1e-50	169.2	5.1	1.9	1	1	0	1	1	1	1	Myelodysplasia-myeloid leukemia factor 1-interacting protein
isotig00013	PF12706.1	0.00055	19.2	0	0.00075	18.8	0	1.2	1	0	0	1	1	1	1	Beta-lactamase superfamily domain
isotig00013	PF00753.21	8.8e-25	87.2	0.1	2.2e-24	85.9	0.1	1.6	1	1	0	1	1	1	1	Metallo-beta-lactamase superfamily
isotig00013	PF10248.3	6.5e-51	172.1	7.4	5.1e-50	169.2	5.1	1.9	1	1	0	1	1	1	1	Myelodysplasia-myeloid leukemia factor 1-interacting protein
isotig00014	PF12706.1	0.00055	19.2	0	0.00075	18.8	0	1.2	1	0	0	1	1	1	1	Beta-lactamase superfamily domain
isotig00014	PF00753.21	8.8e-25	87.2	0.1	2.2e-24	85.9	0.1	1.6	1	1	0	1	1	1	1	Metallo-beta-lactamase superfamily
isotig00014	PF10248.3	7.7e-51	171.9	7.3	6.2e-50	168.9	5.1	2	1	1	0	1	1	1	1	Myelodysplasia-myeloid leukemia factor 1-interacting protein
isotig00015	PF12706.1	0.00055	19.2	0	0.00075	18.8	0	1.2	1	0	0	1	1	1	1	Beta-lactamase superfamily domain
isotig00015	PF00753.21	8.8e-25	87.2	0.1	2.2e-24	85.9	0.1	1.6	1	1	0	1	1	1	1	Metallo-beta-lactamase superfamily
isotig00015	PF10248.3	7.7e-51	171.9	7.3	6.2e-50	168.9	5.1	2	1	1	0	1	1	1	1	Myelodysplasia-myeloid leukemia factor 1-interacting protein
isotig00016	PF12706.1	0.00046	19.5	0	0.00062	19.1	0	1.2	1	0	0	1	1	1	1	Beta-lactamase superfamily domain
isotig00016	PF00753.21	7e-25	87.5	0.1	1.8e-24	86.2	0.1	1.6	1	1	0	1	1	1	1	Metallo-beta-lactamase superfamily
isotig00016	PF10248.3	7.4e-51	171.9	6.5	6.1e-50	168.9	4.5	2.1	1	1	0	1	1	1	1	Myelodysplasia-myeloid leukemia factor 1-interacting protein
isotig00017	PF12706.1	0.00046	19.5	0	0.00062	19.1	0	1.2	1	0	0	1	1	1	1	Beta-lactamase superfamily domain
isotig00017	PF00753.21	7e-25	87.5	0.1	1.8e-24	86.2	0.1	1.6	1	1	0	1	1	1	1	Metallo-beta-lactamase superfamily
isotig00017	PF10248.3	7.4e-51	171.9	6.5	6.1e-50	168.9	4.5	2.1	1	1	0	1	1	1	1	Myelodysplasia-myeloid leukemia factor 1-interacting protein
isotig00018	PF12706.1	0.00055	19.2	0	0.00075	18.8	0	1.2	1	0	0	1	1	1	1	Beta-lactamase superfamily domain
isotig00018	PF00753.21	8.8e-25	87.2	0.1	2.2e-24	85.9	0.1	1.6	1	1	0	1	1	1	1	Metallo-beta-lactamase superfamily
isotig00019	PF00025.15	2e-16	59.4	0.4	2.9e-16	58.9	0.3	1.1	1	0	0	1	1	1	1	ADP-ribosylation factor family
isotig00019	PF00009.21	1.1e-07	31.2	1.2	4.1e-07	29.3	0.6	2	1	1	0	1	1	1	1	Elongation factor Tu GTP binding domain
isotig00019	PF10662.3	0.00043	19.5	0.3	0.014	14.6	0.2	2.4	1	1	0	1	1	1	1	Ethanolamine utilisation - propanediol utilisation
isotig00019	PF02421.12	3.5e-05	22.8	3.1	0.00035	19.5	2.2	1.9	1	1	0	1	1	1	1	Ferrous iron transport protein B
isotig00019	PF04670.6	5.1e-06	25.5	0.3	7.2e-06	25	0.2	1.4	1	1	0	1	1	1	1	Gtr1/RagA G protein conserved region
isotig00019	PF08477.7	6.9e-20	71.4	0.8	2.8e-19	69.5	0	1.9	2	0	0	2	2	1	1	Miro-like protein
isotig00019	PF00071.16	3.5e-60	201.7	0.7	4.3e-60	201.5	0.5	1.1	1	0	0	1	1	1	1	Ras family
isotig00020	PF10248.3	7.4e-51	171.9	6.5	6.1e-50	168.9	4.5	2.1	1	1	0	1	1	1	1	Myelodysplasia-myeloid leukemia factor 1-interacting protein
isotig00021	PF10248.3	7.4e-51	171.9	6.5	6.1e-50	168.9	4.5	2.1	1	1	0	1	1	1	1	Myelodysplasia-myeloid leukemia factor 1-interacting protein
isotig00022	PF10248.3	7.4e-51	171.9	6.5	6.1e-50	168.9	4.5	2.1	1	1	0	1	1	1	1	Myelodysplasia-myeloid leukemia factor 1-interacting protein
isotig00023	PF10248.3	7.4e-51	171.9	6.5	6.1e-50	168.9	4.5	2.1	1	1	0	1	1	1	1	Myelodysplasia-myeloid leukemia factor 1-interacting protein
isotig00024	PF12706.1	0.00046	19.5	0	0.00062	19.1	0	1.2	1	0	0	1	1	1	1	Beta-lactamase superfamily domain
isotig00024	PF00753.21	7e-25	87.5	0.1	1.8e-24	86.2	0.1	1.6	1	1	0	1	1	1	1	Metallo-beta-lactamase superfamily
isotig00024	PF10248.3	9.6e-51	171.5	6.7	7.9e-50	168.6	4.6	2.1	1	1	0	1	1	1	1	Myelodysplasia-myeloid leukemia factor 1-interacting protein
isotig00025	PF12706.1	0.00046	19.5	0	0.00062	19.1	0	1.2	1	0	0	1	1	1	1	Beta-lactamase superfamily domain
isotig00025	PF00753.21	7e-25	87.5	0.1	1.8e-24	86.2	0.1	1.6	1	1	0	1	1	1	1	Metallo-beta-lactamase superfamily
isotig00025	PF10248.3	9.6e-51	171.5	6.7	7.9e-50	168.6	4.6	2.1	1	1	0	1	1	1	1	Myelodysplasia-myeloid leukemia factor 1-interacting protein
isotig00026	PF12706.1	0.00046	19.5	0	0.00062	19.1	0	1.2	1	0	0	1	1	1	1	Beta-lactamase superfamily domain
isotig00026	PF00753.21	7e-25	87.5	0.1	1.8e-24	86.2	0.1	1.6	1	1	0	1	1	1	1	Metallo-beta-lactamase superfamily
isotig00026	PF10248.3	6.5e-51	172.1	7.4	5.1e-50	169.2	5.1	1.9	1	1	0	1	1	1	1	Myelodysplasia-myeloid leukemia factor 1-interacting protein
isotig00027	PF12706.1	0.00046	19.5	0	0.00062	19.1	0	1.2	1	0	0	1	1	1	1	Beta-lactamase superfamily domain
isotig00027	PF00753.21	7e-25	87.5	0.1	1.8e-24	86.2	0.1	1.6	1	1	0	1	1	1	1	Metallo-beta-lactamase superfamily
isotig00027	PF10248.3	6.5e-51	172.1	7.4	5.1e-50	169.2	5.1	1.9	1	1	0	1	1	1	1	Myelodysplasia-myeloid leukemia factor 1-interacting protein
isotig00028	PF10248.3	7.4e-51	171.9	6.5	6.1e-50	168.9	4.5	2.1	1	1	0	1	1	1	1	Myelodysplasia-myeloid leukemia factor 1-interacting protein
isotig00029	PF10248.3	7.4e-51	171.9	6.5	6.1e-50	168.9	4.5	2.1	1	1	0	1	1	1	1	Myelodysplasia-myeloid leukemia factor 1-interacting protein
isotig00030	PF10248.3	9.6e-51	171.5	6.7	7.9e-50	168.6	4.6	2.1	1	1	0	1	1	1	1	Myelodysplasia-myeloid leukemia factor 1-interacting protein
isotig00031	PF10248.3	9.6e-51	171.5	6.7	7.9e-50	168.6	4.6	2.1	1	1	0	1	1	1	1	Myelodysplasia-myeloid leukemia factor 1-interacting protein
isotig00032	PF10248.3	9.6e-51	171.5	6.7	7.9e-50	168.6	4.6	2.1	1	1	0	1	1	1	1	Myelodysplasia-myeloid leukemia factor 1-interacting protein
isotig00033	PF10248.3	9.6e-51	171.5	6.7	7.9e-50	168.6	4.6	2.1	1	1	0	1	1	1	1	Myelodysplasia-myeloid leukemia factor 1-interacting protein
isotig00034	PF10248.3	6.5e-51	172.1	7.4	5.1e-50	169.2	5.1	1.9	1	1	0	1	1	1	1	Myelodysplasia-myeloid leukemia factor 1-interacting protein
isotig00035	PF10248.3	6.5e-51	172.1	7.4	5.1e-50	169.2	5.1	1.9	1	1	0	1	1	1	1	Myelodysplasia-myeloid leukemia factor 1-interacting protein
isotig00036	PF10248.3	6.5e-51	172.1	7.4	5.1e-50	169.2	5.1	1.9	1	1	0	1	1	1	1	Myelodysplasia-myeloid leukemia factor 1-interacting protein
isotig00037	PF10248.3	6.5e-51	172.1	7.4	5.1e-50	169.2	5.1	1.9	1	1	0	1	1	1	1	Myelodysplasia-myeloid leukemia factor 1-interacting protein
isotig00038	PF12706.1	0.00046	19.5	0	0.00062	19.1	0	1.2	1	0	0	1	1	1	1	Beta-lactamase superfamily domain
isotig00038	PF00753.21	7e-25	87.5	0.1	1.8e-24	86.2	0.1	1.6	1	1	0	1	1	1	1	Metallo-beta-lactamase superfamily
isotig00038	PF10248.3	7.7e-51	171.9	7.3	6.2e-50	168.9	5.1	2	1	1	0	1	1	1	1	Myelodysplasia-myeloid leukemia factor 1-interacting protein
isotig00039	PF12706.1	0.00046	19.5	0	0.00062	19.1	0	1.2	1	0	0	1	1	1	1	Beta-lactamase superfamily domain
isotig00039	PF00753.21	7e-25	87.5	0.1	1.8e-24	86.2	0.1	1.6	1	1	0	1	1	1	1	Metallo-beta-lactamase superfamily
isotig00039	PF10248.3	7.7e-51	171.9	7.3	6.2e-50	168.9	5.1	2	1	1	0	1	1	1	1	Myelodysplasia-myeloid leukemia factor 1-interacting protein
isotig00040	PF10248.3	9.6e-51	171.5	6.7	7.9e-50	168.6	4.6	2.1	1	1	0	1	1	1	1	Myelodysplasia-myeloid leukemia factor 1-interacting protein
isotig00041	PF10248.3	9.6e-51	171.5	6.7	7.9e-50	168.6	4.6	2.1	1	1	0	1	1	1	1	Myelodysplasia-myeloid leukemia factor 1-interacting protein
isotig00042	PF12706.1	0.00046	19.5	0	0.00062	19.1	0	1.2	1	0	0	1	1	1	1	Beta-lactamase superfamily domain
isotig00042	PF00753.21	7e-25	87.5	0.1	1.8e-24	86.2	0.1	1.6	1	1	0	1	1	1	1	Metallo-beta-lactamase superfamily
isotig00043	PF10248.3	6.5e-51	172.1	7.4	5.1e-50	169.2	5.1	1.9	1	1	0	1	1	1	1	Myelodysplasia-myeloid leukemia factor 1-interacting protein
isotig00044	PF10248.3	6.5e-51	172.1	7.4	5.1e-50	169.2	5.1	1.9	1	1	0	1	1	1	1	Myelodysplasia-myeloid leukemia factor 1-interacting protein
isotig00045	PF10248.3	7.7e-51	171.9	7.3	6.2e-50	168.9	5.1	2	1	1	0	1	1	1	1	Myelodysplasia-myeloid leukemia factor 1-interacting protein
isotig00046	PF10248.3	7.7e-51	171.9	7.3	6.2e-50	168.9	5.1	2	1	1	0	1	1	1	1	Myelodysplasia-myeloid leukemia factor 1-interacting protein
isotig00047	PF10248.3	7.7e-51	171.9	7.3	6.2e-50	168.9	5.1	2	1	1	0	1	1	1	1	Myelodysplasia-myeloid leukemia factor 1-interacting protein
isotig00048	PF10248.3	7.7e-51	171.9	7.3	6.2e-50	168.9	5.1	2	1	1	0	1	1	1	1	Myelodysplasia-myeloid leukemia factor 1-interacting protein
isotig00049	PF10248.3	7.7e-51	171.9	7.3	6.2e-50	168.9	5.1	2	1	1	0	1	1	1	1	Myelodysplasia-myeloid leukemia factor 1-interacting protein
isotig00050	PF10248.3	7.7e-51	171.9	7.3	6.2e-50	168.9	5.1	2	1	1	0	1	1	1	1	Myelodysplasia-myeloid leukemia factor 1-interacting protein
isotig00051	PF12681.1	2.9e-07	30.7	0	5.5e-07	29.8	0	1.5	2	0	0	2	2	1	1	Glyoxalase-like domain
isotig00052	PF12706.1	0.00055	19.2	0	0.00075	18.8	0	1.2	1	0	0	1	1	1	1	Beta-lactamase superfamily domain
isotig00052	PF00753.21	8.8e-25	87.2	0.1	2.2e-24	85.9	0.1	1.6	1	1	0	1	1	1	1	Metallo-beta-lactamase superfamily
isotig00053	PF10248.3	7.4e-51	171.9	6.5	6.1e-50	168.9	4.5	2.1	1	1	0	1	1	1	1	Myelodysplasia-myeloid leukemia factor 1-interacting protein
isotig00054	PF10248.3	7.4e-51	171.9	6.5	6.1e-50	168.9	4.5	2.1	1	1	0	1	1	1	1	Myelodysplasia-myeloid leukemia factor 1-interacting protein
isotig00055	PF12706.1	0.00046	19.5	0	0.00062	19.1	0	1.2	1	0	0	1	1	1	1	Beta-lactamase superfamily domain
isotig00055	PF00753.21	7e-25	87.5	0.1	1.8e-24	86.2	0.1	1.6	1	1	0	1	1	1	1	Metallo-beta-lactamase superfamily
isotig00056	PF10248.3	7.4e-51	171.9	6.5	6.1e-50	168.9	4.5	2.1	1	1	0	1	1	1	1	Myelodysplasia-myeloid leukemia factor 1-interacting protein
isotig00057	PF10248.3	9.6e-51	171.5	6.7	7.9e-50	168.6	4.6	2.1	1	1	0	1	1	1	1	Myelodysplasia-myeloid leukemia factor 1-interacting protein
isotig00058	PF10248.3	9.6e-51	171.5	6.7	7.9e-50	168.6	4.6	2.1	1	1	0	1	1	1	1	Myelodysplasia-myeloid leukemia factor 1-interacting protein
isotig00059	PF10248.3	6.5e-51	172.1	7.4	5.1e-50	169.2	5.1	1.9	1	1	0	1	1	1	1	Myelodysplasia-myeloid leukemia factor 1-interacting protein
isotig00060	PF10248.3	6.5e-51	172.1	7.4	5.1e-50	169.2	5.1	1.9	1	1	0	1	1	1	1	Myelodysplasia-myeloid leukemia factor 1-interacting protein
isotig00061	PF10248.3	9.6e-51	171.5	6.7	7.9e-50	168.6	4.6	2.1	1	1	0	1	1	1	1	Myelodysplasia-myeloid leukemia factor 1-interacting protein
isotig00062	PF10248.3	6.5e-51	172.1	7.4	5.1e-50	169.2	5.1	1.9	1	1	0	1	1	1	1	Myelodysplasia-myeloid leukemia factor 1-interacting protein
isotig00063	PF10248.3	7.7e-51	171.9	7.3	6.2e-50	168.9	5.1	2	1	1	0	1	1	1	1	Myelodysplasia-myeloid leukemia factor 1-interacting protein
isotig00064	PF10248.3	7.7e-51	171.9	7.3	6.2e-50	168.9	5.1	2	1	1	0	1	1	1	1	Myelodysplasia-myeloid leukemia factor 1-interacting protein
isotig00065	PF10248.3	7.7e-51	171.9	7.3	6.2e-50	168.9	5.1	2	1	1	0	1	1	1	1	Myelodysplasia-myeloid leukemia factor 1-interacting protein
isotig00066	PF12681.1	2.9e-07	30.7	0	5.5e-07	29.8	0	1.5	2	0	0	2	2	1	1	Glyoxalase-like domain
isotig00067	PF00025.15	2e-16	59.4	0.4	2.9e-16	58.9	0.3	1.1	1	0	0	1	1	1	1	ADP-ribosylation factor family
isotig00067	PF00009.21	1.1e-07	31.2	1.2	4.1e-07	29.3	0.6	2	1	1	0	1	1	1	1	Elongation factor Tu GTP binding domain
isotig00067	PF10662.3	0.00043	19.5	0.3	0.014	14.6	0.2	2.4	1	1	0	1	1	1	1	Ethanolamine utilisation - propanediol utilisation
isotig00067	PF02421.12	3.5e-05	22.8	3.1	0.00035	19.5	2.2	1.9	1	1	0	1	1	1	1	Ferrous iron transport protein B
isotig00067	PF04670.6	5.1e-06	25.5	0.3	7.2e-06	25	0.2	1.4	1	1	0	1	1	1	1	Gtr1/RagA G protein conserved region
isotig00067	PF08477.7	6.9e-20	71.4	0.8	2.8e-19	69.5	0	1.9	2	0	0	2	2	1	1	Miro-like protein
isotig00067	PF00071.16	3.5e-60	201.7	0.7	4.3e-60	201.5	0.5	1.1	1	0	0	1	1	1	1	Ras family
isotig00068	PF12706.1	0.00055	19.2	0	0.00075	18.8	0	1.2	1	0	0	1	1	1	1	Beta-lactamase superfamily domain
isotig00068	PF00753.21	8.8e-25	87.2	0.1	2.2e-24	85.9	0.1	1.6	1	1	0	1	1	1	1	Metallo-beta-lactamase superfamily
isotig00069	PF12706.1	0.00046	19.5	0	0.00062	19.1	0	1.2	1	0	0	1	1	1	1	Beta-lactamase superfamily domain
isotig00069	PF00753.21	7e-25	87.5	0.1	1.8e-24	86.2	0.1	1.6	1	1	0	1	1	1	1	Metallo-beta-lactamase superfamily
isotig00070	PF12681.1	2.9e-07	30.7	0	5.5e-07	29.8	0	1.5	2	0	0	2	2	1	1	Glyoxalase-like domain
isotig00072	PF12706.1	0.00055	19.2	0	0.00075	18.8	0	1.2	1	0	0	1	1	1	1	Beta-lactamase superfamily domain
isotig00072	PF00753.21	8.8e-25	87.2	0.1	2.2e-24	85.9	0.1	1.6	1	1	0	1	1	1	1	Metallo-beta-lactamase superfamily
isotig00073	PF12706.1	0.00055	19.2	0	0.00075	18.8	0	1.2	1	0	0	1	1	1	1	Beta-lactamase superfamily domain
isotig00073	PF00753.21	8.8e-25	87.2	0.1	2.2e-24	85.9	0.1	1.6	1	1	0	1	1	1	1	Metallo-beta-lactamase superfamily
isotig00075	PF12706.1	0.00046	19.5	0	0.00062	19.1	0	1.2	1	0	0	1	1	1	1	Beta-lactamase superfamily domain
isotig00075	PF00753.21	7e-25	87.5	0.1	1.8e-24	86.2	0.1	1.6	1	1	0	1	1	1	1	Metallo-beta-lactamase superfamily
isotig00076	PF12706.1	0.00046	19.5	0	0.00062	19.1	0	1.2	1	0	0	1	1	1	1	Beta-lactamase superfamily domain
isotig00076	PF00753.21	7e-25	87.5	0.1	1.8e-24	86.2	0.1	1.6	1	1	0	1	1	1	1	Metallo-beta-lactamase superfamily
isotig00083	PF12681.1	2.9e-07	30.7	0	5.5e-07	29.8	0	1.5	2	0	0	2	2	1	1	Glyoxalase-like domain
isotig00084	PF12706.1	0.00055	19.2	0	0.00075	18.8	0	1.2	1	0	0	1	1	1	1	Beta-lactamase superfamily domain
isotig00084	PF00753.21	8.8e-25	87.2	0.1	2.2e-24	85.9	0.1	1.6	1	1	0	1	1	1	1	Metallo-beta-lactamase superfamily
isotig00086	PF12706.1	0.00046	19.5	0	0.00062	19.1	0	1.2	1	0	0	1	1	1	1	Beta-lactamase superfamily domain
isotig00086	PF00753.21	7e-25	87.5	0.1	1.8e-24	86.2	0.1	1.6	1	1	0	1	1	1	1	Metallo-beta-lactamase superfamily
isotig00109	PF00019.14	1.6e-07	31.2	0.5	3.4e-07	30.2	0.3	1.6	1	0	0	1	1	1	1	Transforming growth factor beta like domain
isotig00110	PF00019.14	1.7e-07	31.2	0.5	3.3e-07	30.2	0.3	1.5	1	0	0	1	1	1	1	Transforming growth factor beta like domain
isotig00111	PF00019.14	1.6e-07	31.2	0.5	3.4e-07	30.2	0.3	1.6	1	0	0	1	1	1	1	Transforming growth factor beta like domain
isotig00112	PF00019.14	1.6e-07	31.2	0.5	3.4e-07	30.2	0.3	1.6	1	0	0	1	1	1	1	Transforming growth factor beta like domain
isotig00113	PF00019.14	1.7e-07	31.2	0.5	3.3e-07	30.2	0.3	1.5	1	0	0	1	1	1	1	Transforming growth factor beta like domain
isotig00114	PF00019.14	1.7e-07	31.2	0.5	3.3e-07	30.2	0.3	1.5	1	0	0	1	1	1	1	Transforming growth factor beta like domain
isotig00115	PF00019.14	1.5e-07	31.4	0.5	3.3e-07	30.2	0.3	1.6	1	0	0	1	1	1	1	Transforming growth factor beta like domain
isotig00116	PF00019.14	1.6e-07	31.2	0.5	3.4e-07	30.2	0.3	1.6	1	0	0	1	1	1	1	Transforming growth factor beta like domain
isotig00117	PF00019.14	1.5e-07	31.4	0.5	3.3e-07	30.2	0.3	1.7	1	0	0	1	1	1	1	Transforming growth factor beta like domain
isotig00118	PF00019.14	1.7e-07	31.2	0.5	3.3e-07	30.2	0.3	1.5	1	0	0	1	1	1	1	Transforming growth factor beta like domain
isotig00119	PF00019.14	1.5e-07	31.4	0.5	3.3e-07	30.2	0.3	1.6	1	0	0	1	1	1	1	Transforming growth factor beta like domain
isotig00120	PF00019.14	1.5e-07	31.4	0.5	3.3e-07	30.2	0.3	1.7	1	0	0	1	1	1	1	Transforming growth factor beta like domain
isotig00121	PF00019.14	1.5e-07	31.4	0.5	3.3e-07	30.2	0.3	1.6	1	0	0	1	1	1	1	Transforming growth factor beta like domain
isotig00123	PF00019.14	1.5e-07	31.4	0.5	3.3e-07	30.2	0.3	1.7	1	0	0	1	1	1	1	Transforming growth factor beta like domain
isotig00124	PF00019.14	1.5e-07	31.4	0.5	3.3e-07	30.2	0.3	1.6	1	0	0	1	1	1	1	Transforming growth factor beta like domain
isotig00125	PF00019.14	1.5e-07	31.4	0.5	3.3e-07	30.2	0.3	1.7	1	0	0	1	1	1	1	Transforming growth factor beta like domain
isotig00126	PF00019.14	1.6e-07	31.2	0.5	3.4e-07	30.2	0.3	1.6	1	0	0	1	1	1	1	Transforming growth factor beta like domain
isotig00128	PF00019.14	1.7e-07	31.2	0.5	3.3e-07	30.2	0.3	1.5	1	0	0	1	1	1	1	Transforming growth factor beta like domain
isotig00129	PF00019.14	1.6e-07	31.2	0.5	3.4e-07	30.2	0.3	1.6	1	0	0	1	1	1	1	Transforming growth factor beta like domain
isotig00130	PF00019.14	1.6e-07	31.2	0.5	3.4e-07	30.2	0.3	1.6	1	0	0	1	1	1	1	Transforming growth factor beta like domain
isotig00131	PF00019.14	1.7e-07	31.2	0.5	3.3e-07	30.2	0.3	1.5	1	0	0	1	1	1	1	Transforming growth factor beta like domain
isotig00132	PF00019.14	1.7e-07	31.2	0.5	3.3e-07	30.2	0.3	1.5	1	0	0	1	1	1	1	Transforming growth factor beta like domain
isotig00133	PF00019.14	1.6e-07	31.2	0.5	3.4e-07	30.2	0.3	1.6	1	0	0	1	1	1	1	Transforming growth factor beta like domain
isotig00134	PF00019.14	1.7e-07	31.2	0.5	3.3e-07	30.2	0.3	1.5	1	0	0	1	1	1	1	Transforming growth factor beta like domain
isotig00135	PF00019.14	1.5e-07	31.4	0.5	3.3e-07	30.2	0.3	1.6	1	0	0	1	1	1	1	Transforming growth factor beta like domain
isotig00136	PF00019.14	1.5e-07	31.4	0.5	3.3e-07	30.2	0.3	1.7	1	0	0	1	1	1	1	Transforming growth factor beta like domain
isotig00137	PF00019.14	1.5e-07	31.4	0.5	3.3e-07	30.2	0.3	1.6	1	0	0	1	1	1	1	Transforming growth factor beta like domain
isotig00138	PF00019.14	1.5e-07	31.4	0.5	3.3e-07	30.2	0.3	1.7	1	0	0	1	1	1	1	Transforming growth factor beta like domain
isotig00139	PF00019.14	1.5e-07	31.4	0.5	3.3e-07	30.2	0.3	1.6	1	0	0	1	1	1	1	Transforming growth factor beta like domain
isotig00140	PF00019.14	1.5e-07	31.4	0.5	3.3e-07	30.2	0.3	1.7	1	0	0	1	1	1	1	Transforming growth factor beta like domain
isotig00141	PF00019.14	1.5e-07	31.4	0.5	3.3e-07	30.2	0.3	1.6	1	0	0	1	1	1	1	Transforming growth factor beta like domain
isotig00142	PF00019.14	1.5e-07	31.4	0.5	3.3e-07	30.2	0.3	1.7	1	0	0	1	1	1	1	Transforming growth factor beta like domain
isotig00143	PF00019.14	1.6e-07	31.2	0.5	3.4e-07	30.2	0.3	1.6	1	0	0	1	1	1	1	Transforming growth factor beta like domain
isotig00144	PF00019.14	1.7e-07	31.2	0.5	3.3e-07	30.2	0.3	1.5	1	0	0	1	1	1	1	Transforming growth factor beta like domain
isotig00145	PF00019.14	1.6e-07	31.2	0.5	3.4e-07	30.2	0.3	1.6	1	0	0	1	1	1	1	Transforming growth factor beta like domain
isotig00146	PF00019.14	1.7e-07	31.2	0.5	3.3e-07	30.2	0.3	1.5	1	0	0	1	1	1	1	Transforming growth factor beta like domain
isotig00147	PF00019.14	1.5e-07	31.4	0.5	3.3e-07	30.2	0.3	1.6	1	0	0	1	1	1	1	Transforming growth factor beta like domain
isotig00148	PF00019.14	1.5e-07	31.4	0.5	3.3e-07	30.2	0.3	1.7	1	0	0	1	1	1	1	Transforming growth factor beta like domain
isotig00149	PF00019.14	1.5e-07	31.4	0.5	3.3e-07	30.2	0.3	1.6	1	0	0	1	1	1	1	Transforming growth factor beta like domain
isotig00150	PF00019.14	1.5e-07	31.4	0.5	3.3e-07	30.2	0.3	1.7	1	0	0	1	1	1	1	Transforming growth factor beta like domain
isotig00151	PF12697.1	0.00012	21.8	0	0.00021	21	0	1.4	1	0	0	1	1	1	1	Alpha/beta hydrolase family
isotig00151	PF00450.16	3.3e-93	312.8	0	4.3e-93	312.4	0	1.1	1	0	0	1	1	1	1	Serine carboxypeptidase
isotig00152	PF12697.1	0.00012	21.8	0	0.00021	21	0	1.4	1	0	0	1	1	1	1	Alpha/beta hydrolase family
isotig00152	PF00450.16	3.3e-93	312.8	0	4.3e-93	312.4	0	1.1	1	0	0	1	1	1	1	Serine carboxypeptidase
isotig00153	PF00019.14	1.6e-07	31.2	0.5	3.4e-07	30.2	0.3	1.6	1	0	0	1	1	1	1	Transforming growth factor beta like domain
isotig00154	PF00019.14	1.7e-07	31.2	0.5	3.3e-07	30.2	0.3	1.5	1	0	0	1	1	1	1	Transforming growth factor beta like domain
isotig00155	PF00019.14	1.5e-07	31.4	0.5	3.3e-07	30.2	0.3	1.6	1	0	0	1	1	1	1	Transforming growth factor beta like domain
isotig00156	PF00019.14	1.5e-07	31.4	0.5	3.3e-07	30.2	0.3	1.7	1	0	0	1	1	1	1	Transforming growth factor beta like domain
isotig00160	PF12697.1	0.00012	21.8	0	0.00021	21	0	1.4	1	0	0	1	1	1	1	Alpha/beta hydrolase family
isotig00160	PF00450.16	3.3e-93	312.8	0	4.3e-93	312.4	0	1.1	1	0	0	1	1	1	1	Serine carboxypeptidase
isotig00161	PF12697.1	0.00012	21.8	0	0.00021	21	0	1.4	1	0	0	1	1	1	1	Alpha/beta hydrolase family
isotig00161	PF00450.16	3.3e-93	312.8	0	4.3e-93	312.4	0	1.1	1	0	0	1	1	1	1	Serine carboxypeptidase
isotig00172	PF00019.14	9e-08	32	0.7	1.9e-07	31	0.5	1.6	1	0	0	1	1	1	1	Transforming growth factor beta like domain
isotig00173	PF00019.14	9.3e-08	32	0.7	1.8e-07	31	0.5	1.5	1	0	0	1	1	1	1	Transforming growth factor beta like domain
isotig00174	PF00019.14	8.2e-08	32.2	0.7	1.9e-07	31	0.5	1.6	1	0	0	1	1	1	1	Transforming growth factor beta like domain
isotig00175	PF00019.14	8.1e-08	32.2	0.7	1.9e-07	31	0.5	1.7	1	0	0	1	1	1	1	Transforming growth factor beta like domain
isotig00182	PF00278.16	5.5e-32	109.6	0	6.7e-32	109.3	0	1.1	1	0	0	1	1	1	1	Pyridoxal-dependent decarboxylase, C-terminal sheet domain
isotig00182	PF02784.10	1.3e-36	125.8	0	1.7e-36	125.4	0	1.1	1	0	0	1	1	1	1	Pyridoxal-dependent decarboxylase, pyridoxal binding domain
isotig00183	PF00278.16	5.5e-32	109.6	0	6.7e-32	109.3	0	1.1	1	0	0	1	1	1	1	Pyridoxal-dependent decarboxylase, C-terminal sheet domain
isotig00183	PF02784.10	1.3e-36	125.8	0	1.7e-36	125.4	0	1.1	1	0	0	1	1	1	1	Pyridoxal-dependent decarboxylase, pyridoxal binding domain
isotig00184	PF00278.16	5.5e-32	109.6	0	6.7e-32	109.3	0	1.1	1	0	0	1	1	1	1	Pyridoxal-dependent decarboxylase, C-terminal sheet domain
isotig00184	PF02784.10	1.3e-36	125.8	0	1.7e-36	125.4	0	1.1	1	0	0	1	1	1	1	Pyridoxal-dependent decarboxylase, pyridoxal binding domain
isotig00185	PF00278.16	5.5e-32	109.6	0	6.7e-32	109.3	0	1.1	1	0	0	1	1	1	1	Pyridoxal-dependent decarboxylase, C-terminal sheet domain
isotig00185	PF02784.10	1.3e-36	125.8	0	1.7e-36	125.4	0	1.1	1	0	0	1	1	1	1	Pyridoxal-dependent decarboxylase, pyridoxal binding domain
isotig00186	PF00278.16	5.5e-32	109.6	0	6.7e-32	109.3	0	1.1	1	0	0	1	1	1	1	Pyridoxal-dependent decarboxylase, C-terminal sheet domain
isotig00186	PF02784.10	1.3e-36	125.8	0	1.7e-36	125.4	0	1.1	1	0	0	1	1	1	1	Pyridoxal-dependent decarboxylase, pyridoxal binding domain
isotig00187	PF00278.16	5.5e-32	109.6	0	6.7e-32	109.3	0	1.1	1	0	0	1	1	1	1	Pyridoxal-dependent decarboxylase, C-terminal sheet domain
isotig00187	PF02784.10	1.3e-36	125.8	0	1.7e-36	125.4	0	1.1	1	0	0	1	1	1	1	Pyridoxal-dependent decarboxylase, pyridoxal binding domain
isotig00188	PF00278.16	5.5e-32	109.6	0	6.7e-32	109.3	0	1.1	1	0	0	1	1	1	1	Pyridoxal-dependent decarboxylase, C-terminal sheet domain
isotig00188	PF02784.10	1.3e-36	125.8	0	1.7e-36	125.4	0	1.1	1	0	0	1	1	1	1	Pyridoxal-dependent decarboxylase, pyridoxal binding domain
isotig00189	PF00278.16	5.5e-32	109.6	0	6.7e-32	109.3	0	1.1	1	0	0	1	1	1	1	Pyridoxal-dependent decarboxylase, C-terminal sheet domain
isotig00189	PF02784.10	1.3e-36	125.8	0	1.7e-36	125.4	0	1.1	1	0	0	1	1	1	1	Pyridoxal-dependent decarboxylase, pyridoxal binding domain
isotig00190	PF00278.16	5.5e-32	109.6	0	6.7e-32	109.3	0	1.1	1	0	0	1	1	1	1	Pyridoxal-dependent decarboxylase, C-terminal sheet domain
isotig00190	PF02784.10	1.3e-36	125.8	0	1.7e-36	125.4	0	1.1	1	0	0	1	1	1	1	Pyridoxal-dependent decarboxylase, pyridoxal binding domain
isotig00191	PF00278.16	5.5e-32	109.6	0	6.7e-32	109.3	0	1.1	1	0	0	1	1	1	1	Pyridoxal-dependent decarboxylase, C-terminal sheet domain
isotig00191	PF02784.10	1.3e-36	125.8	0	1.7e-36	125.4	0	1.1	1	0	0	1	1	1	1	Pyridoxal-dependent decarboxylase, pyridoxal binding domain
isotig00192	PF00278.16	5.5e-32	109.6	0	6.7e-32	109.3	0	1.1	1	0	0	1	1	1	1	Pyridoxal-dependent decarboxylase, C-terminal sheet domain
isotig00192	PF02784.10	1.3e-36	125.8	0	1.7e-36	125.4	0	1.1	1	0	0	1	1	1	1	Pyridoxal-dependent decarboxylase, pyridoxal binding domain
isotig00193	PF00278.16	5.5e-32	109.6	0	6.7e-32	109.3	0	1.1	1	0	0	1	1	1	1	Pyridoxal-dependent decarboxylase, C-terminal sheet domain
isotig00193	PF02784.10	1.3e-36	125.8	0	1.7e-36	125.4	0	1.1	1	0	0	1	1	1	1	Pyridoxal-dependent decarboxylase, pyridoxal binding domain
isotig00194	PF00278.16	5.5e-32	109.6	0	6.7e-32	109.3	0	1.1	1	0	0	1	1	1	1	Pyridoxal-dependent decarboxylase, C-terminal sheet domain
isotig00194	PF02784.10	1.3e-36	125.8	0	1.7e-36	125.4	0	1.1	1	0	0	1	1	1	1	Pyridoxal-dependent decarboxylase, pyridoxal binding domain
isotig00195	PF00278.16	5.5e-32	109.6	0	6.7e-32	109.3	0	1.1	1	0	0	1	1	1	1	Pyridoxal-dependent decarboxylase, C-terminal sheet domain
isotig00195	PF02784.10	1.3e-36	125.8	0	1.7e-36	125.4	0	1.1	1	0	0	1	1	1	1	Pyridoxal-dependent decarboxylase, pyridoxal binding domain
isotig00196	PF00278.16	5.5e-32	109.6	0	6.7e-32	109.3	0	1.1	1	0	0	1	1	1	1	Pyridoxal-dependent decarboxylase, C-terminal sheet domain
isotig00196	PF02784.10	1.3e-36	125.8	0	1.7e-36	125.4	0	1.1	1	0	0	1	1	1	1	Pyridoxal-dependent decarboxylase, pyridoxal binding domain
isotig00197	PF00278.16	5.5e-32	109.6	0	6.7e-32	109.3	0	1.1	1	0	0	1	1	1	1	Pyridoxal-dependent decarboxylase, C-terminal sheet domain
isotig00197	PF02784.10	1.3e-36	125.8	0	1.7e-36	125.4	0	1.1	1	0	0	1	1	1	1	Pyridoxal-dependent decarboxylase, pyridoxal binding domain
isotig00198	PF00278.16	5.5e-32	109.6	0	6.7e-32	109.3	0	1.1	1	0	0	1	1	1	1	Pyridoxal-dependent decarboxylase, C-terminal sheet domain
isotig00198	PF02784.10	1.3e-36	125.8	0	1.7e-36	125.4	0	1.1	1	0	0	1	1	1	1	Pyridoxal-dependent decarboxylase, pyridoxal binding domain
isotig00199	PF00278.16	5.5e-32	109.6	0	6.7e-32	109.3	0	1.1	1	0	0	1	1	1	1	Pyridoxal-dependent decarboxylase, C-terminal sheet domain
isotig00199	PF02784.10	1.3e-36	125.8	0	1.7e-36	125.4	0	1.1	1	0	0	1	1	1	1	Pyridoxal-dependent decarboxylase, pyridoxal binding domain
isotig00200	PF00278.16	5.5e-32	109.6	0	6.7e-32	109.3	0	1.1	1	0	0	1	1	1	1	Pyridoxal-dependent decarboxylase, C-terminal sheet domain
isotig00200	PF02784.10	1.3e-36	125.8	0	1.7e-36	125.4	0	1.1	1	0	0	1	1	1	1	Pyridoxal-dependent decarboxylase, pyridoxal binding domain
isotig00201	PF00278.16	5.5e-32	109.6	0	6.7e-32	109.3	0	1.1	1	0	0	1	1	1	1	Pyridoxal-dependent decarboxylase, C-terminal sheet domain
isotig00201	PF02784.10	1.3e-36	125.8	0	1.7e-36	125.4	0	1.1	1	0	0	1	1	1	1	Pyridoxal-dependent decarboxylase, pyridoxal binding domain
isotig00202	PF00278.16	5.5e-32	109.6	0	6.7e-32	109.3	0	1.1	1	0	0	1	1	1	1	Pyridoxal-dependent decarboxylase, C-terminal sheet domain
isotig00202	PF02784.10	1.3e-36	125.8	0	1.7e-36	125.4	0	1.1	1	0	0	1	1	1	1	Pyridoxal-dependent decarboxylase, pyridoxal binding domain
isotig00203	PF00278.16	5.5e-32	109.6	0	6.7e-32	109.3	0	1.1	1	0	0	1	1	1	1	Pyridoxal-dependent decarboxylase, C-terminal sheet domain
isotig00203	PF02784.10	1.3e-36	125.8	0	1.7e-36	125.4	0	1.1	1	0	0	1	1	1	1	Pyridoxal-dependent decarboxylase, pyridoxal binding domain
isotig00204	PF00278.16	5.5e-32	109.6	0	6.7e-32	109.3	0	1.1	1	0	0	1	1	1	1	Pyridoxal-dependent decarboxylase, C-terminal sheet domain
isotig00204	PF02784.10	1.3e-36	125.8	0	1.7e-36	125.4	0	1.1	1	0	0	1	1	1	1	Pyridoxal-dependent decarboxylase, pyridoxal binding domain
isotig00205	PF00278.16	5.5e-32	109.6	0	6.7e-32	109.3	0	1.1	1	0	0	1	1	1	1	Pyridoxal-dependent decarboxylase, C-terminal sheet domain
isotig00205	PF02784.10	1.3e-36	125.8	0	1.7e-36	125.4	0	1.1	1	0	0	1	1	1	1	Pyridoxal-dependent decarboxylase, pyridoxal binding domain
isotig00206	PF00278.16	5.5e-32	109.6	0	6.7e-32	109.3	0	1.1	1	0	0	1	1	1	1	Pyridoxal-dependent decarboxylase, C-terminal sheet domain
isotig00206	PF02784.10	1.3e-36	125.8	0	1.7e-36	125.4	0	1.1	1	0	0	1	1	1	1	Pyridoxal-dependent decarboxylase, pyridoxal binding domain
isotig00207	PF00278.16	5.5e-32	109.6	0	6.7e-32	109.3	0	1.1	1	0	0	1	1	1	1	Pyridoxal-dependent decarboxylase, C-terminal sheet domain
isotig00207	PF02784.10	1.3e-36	125.8	0	1.7e-36	125.4	0	1.1	1	0	0	1	1	1	1	Pyridoxal-dependent decarboxylase, pyridoxal binding domain
isotig00208	PF00278.16	5.5e-32	109.6	0	6.7e-32	109.3	0	1.1	1	0	0	1	1	1	1	Pyridoxal-dependent decarboxylase, C-terminal sheet domain
isotig00208	PF02784.10	1.3e-36	125.8	0	1.7e-36	125.4	0	1.1	1	0	0	1	1	1	1	Pyridoxal-dependent decarboxylase, pyridoxal binding domain
isotig00227	PF06747.7	1.6e-05	24.4	5.8	2.5e-05	23.8	4	1.3	1	0	0	1	1	1	1	CHCH domain
isotig00227	PF02297.11	0.00042	19.9	6.1	0.00053	19.6	4.3	1.1	1	0	0	1	1	1	1	Cytochrome oxidase c subunit VIb
isotig00228	PF06747.7	1.6e-05	24.4	5.8	2.5e-05	23.8	4	1.3	1	0	0	1	1	1	1	CHCH domain
isotig00228	PF02297.11	0.00042	19.9	6.1	0.00053	19.6	4.3	1.1	1	0	0	1	1	1	1	Cytochrome oxidase c subunit VIb
isotig00229	PF06747.7	1.6e-05	24.4	5.8	2.5e-05	23.8	4	1.3	1	0	0	1	1	1	1	CHCH domain
isotig00229	PF02297.11	0.00042	19.9	6.1	0.00053	19.6	4.3	1.1	1	0	0	1	1	1	1	Cytochrome oxidase c subunit VIb
isotig00230	PF06747.7	1.6e-05	24.4	5.8	2.5e-05	23.8	4	1.3	1	0	0	1	1	1	1	CHCH domain
isotig00230	PF02297.11	0.00042	19.9	6.1	0.00053	19.6	4.3	1.1	1	0	0	1	1	1	1	Cytochrome oxidase c subunit VIb
isotig00232	PF06747.7	1.6e-05	24.4	5.8	2.5e-05	23.8	4	1.3	1	0	0	1	1	1	1	CHCH domain
isotig00232	PF02297.11	0.00042	19.9	6.1	0.00053	19.6	4.3	1.1	1	0	0	1	1	1	1	Cytochrome oxidase c subunit VIb
isotig00233	PF06747.7	1.6e-05	24.4	5.8	2.5e-05	23.8	4	1.3	1	0	0	1	1	1	1	CHCH domain
isotig00233	PF02297.11	0.00042	19.9	6.1	0.00053	19.6	4.3	1.1	1	0	0	1	1	1	1	Cytochrome oxidase c subunit VIb
isotig00234	PF06747.7	1.6e-05	24.4	5.8	2.5e-05	23.8	4	1.3	1	0	0	1	1	1	1	CHCH domain
isotig00234	PF02297.11	0.00042	19.9	6.1	0.00053	19.6	4.3	1.1	1	0	0	1	1	1	1	Cytochrome oxidase c subunit VIb
isotig00235	PF06747.7	1.6e-05	24.4	5.8	2.5e-05	23.8	4	1.3	1	0	0	1	1	1	1	CHCH domain
isotig00235	PF02297.11	0.00042	19.9	6.1	0.00053	19.6	4.3	1.1	1	0	0	1	1	1	1	Cytochrome oxidase c subunit VIb
isotig00236	PF00089.20	4.4e-13	49	0.1	5.4e-13	48.7	0.1	1	1	0	0	1	1	1	1	Trypsin
isotig00237	PF00089.20	8e-08	31.8	0	1.5e-07	30.9	0	1.5	1	1	1	2	2	1	1	Trypsin
isotig00238	PF00089.20	4.4e-13	49	0.1	5.4e-13	48.7	0.1	1	1	0	0	1	1	1	1	Trypsin
isotig00239	PF06747.7	1.6e-05	24.4	5.8	2.5e-05	23.8	4	1.3	1	0	0	1	1	1	1	CHCH domain
isotig00239	PF02297.11	0.00042	19.9	6.1	0.00053	19.6	4.3	1.1	1	0	0	1	1	1	1	Cytochrome oxidase c subunit VIb
isotig00239	PF00089.20	4.4e-13	49	0.1	5.4e-13	48.7	0.1	1	1	0	0	1	1	1	1	Trypsin
isotig00240	PF06747.7	1.6e-05	24.4	5.8	2.5e-05	23.8	4	1.3	1	0	0	1	1	1	1	CHCH domain
isotig00240	PF02297.11	0.00042	19.9	6.1	0.00053	19.6	4.3	1.1	1	0	0	1	1	1	1	Cytochrome oxidase c subunit VIb
isotig00240	PF00089.20	4.4e-13	49	0.1	5.4e-13	48.7	0.1	1	1	0	0	1	1	1	1	Trypsin
isotig00241	PF06747.7	1.6e-05	24.4	5.8	2.5e-05	23.8	4	1.3	1	0	0	1	1	1	1	CHCH domain
isotig00241	PF02297.11	0.00042	19.9	6.1	0.00053	19.6	4.3	1.1	1	0	0	1	1	1	1	Cytochrome oxidase c subunit VIb
isotig00241	PF00089.20	4.4e-13	49	0.1	5.4e-13	48.7	0.1	1	1	0	0	1	1	1	1	Trypsin
isotig00242	PF06747.7	1.6e-05	24.4	5.8	2.5e-05	23.8	4	1.3	1	0	0	1	1	1	1	CHCH domain
isotig00242	PF02297.11	0.00042	19.9	6.1	0.00053	19.6	4.3	1.1	1	0	0	1	1	1	1	Cytochrome oxidase c subunit VIb
isotig00242	PF00089.20	4.4e-13	49	0.1	5.4e-13	48.7	0.1	1	1	0	0	1	1	1	1	Trypsin
isotig00243	PF00089.20	8e-08	31.8	0	1.5e-07	30.9	0	1.5	1	1	1	2	2	1	1	Trypsin
isotig00244	PF00089.20	4.4e-13	49	0.1	5.4e-13	48.7	0.1	1	1	0	0	1	1	1	1	Trypsin
isotig00245	PF06747.7	1.6e-05	24.4	5.8	2.5e-05	23.8	4	1.3	1	0	0	1	1	1	1	CHCH domain
isotig00245	PF02297.11	0.00042	19.9	6.1	0.00053	19.6	4.3	1.1	1	0	0	1	1	1	1	Cytochrome oxidase c subunit VIb
isotig00245	PF00089.20	8e-08	31.8	0	1.5e-07	30.9	0	1.5	1	1	1	2	2	1	1	Trypsin
isotig00246	PF06747.7	1.6e-05	24.4	5.8	2.5e-05	23.8	4	1.3	1	0	0	1	1	1	1	CHCH domain
isotig00246	PF02297.11	0.00042	19.9	6.1	0.00053	19.6	4.3	1.1	1	0	0	1	1	1	1	Cytochrome oxidase c subunit VIb
isotig00246	PF00089.20	8e-08	31.8	0	1.5e-07	30.9	0	1.5	1	1	1	2	2	1	1	Trypsin
isotig00247	PF06747.7	1.6e-05	24.4	5.8	2.5e-05	23.8	4	1.3	1	0	0	1	1	1	1	CHCH domain
isotig00247	PF02297.11	0.00042	19.9	6.1	0.00053	19.6	4.3	1.1	1	0	0	1	1	1	1	Cytochrome oxidase c subunit VIb
isotig00247	PF00089.20	8e-08	31.8	0	1.5e-07	30.9	0	1.5	1	1	1	2	2	1	1	Trypsin
isotig00248	PF06747.7	1.6e-05	24.4	5.8	2.5e-05	23.8	4	1.3	1	0	0	1	1	1	1	CHCH domain
isotig00248	PF02297.11	0.00042	19.9	6.1	0.00053	19.6	4.3	1.1	1	0	0	1	1	1	1	Cytochrome oxidase c subunit VIb
isotig00248	PF00089.20	8e-08	31.8	0	1.5e-07	30.9	0	1.5	1	1	1	2	2	1	1	Trypsin
isotig00249	PF06747.7	1.6e-05	24.4	5.8	2.5e-05	23.8	4	1.3	1	0	0	1	1	1	1	CHCH domain
isotig00249	PF02297.11	0.00042	19.9	6.1	0.00053	19.6	4.3	1.1	1	0	0	1	1	1	1	Cytochrome oxidase c subunit VIb
isotig00249	PF00089.20	4.4e-13	49	0.1	5.4e-13	48.7	0.1	1	1	0	0	1	1	1	1	Trypsin
isotig00250	PF06747.7	1.6e-05	24.4	5.8	2.5e-05	23.8	4	1.3	1	0	0	1	1	1	1	CHCH domain
isotig00250	PF02297.11	0.00042	19.9	6.1	0.00053	19.6	4.3	1.1	1	0	0	1	1	1	1	Cytochrome oxidase c subunit VIb
isotig00250	PF00089.20	4.4e-13	49	0.1	5.4e-13	48.7	0.1	1	1	0	0	1	1	1	1	Trypsin
isotig00251	PF06747.7	1.6e-05	24.4	5.8	2.5e-05	23.8	4	1.3	1	0	0	1	1	1	1	CHCH domain
isotig00251	PF02297.11	0.00042	19.9	6.1	0.00053	19.6	4.3	1.1	1	0	0	1	1	1	1	Cytochrome oxidase c subunit VIb
isotig00251	PF00089.20	4.4e-13	49	0.1	5.4e-13	48.7	0.1	1	1	0	0	1	1	1	1	Trypsin
isotig00252	PF06747.7	1.6e-05	24.4	5.8	2.5e-05	23.8	4	1.3	1	0	0	1	1	1	1	CHCH domain
isotig00252	PF02297.11	0.00042	19.9	6.1	0.00053	19.6	4.3	1.1	1	0	0	1	1	1	1	Cytochrome oxidase c subunit VIb
isotig00252	PF00089.20	4.4e-13	49	0.1	5.4e-13	48.7	0.1	1	1	0	0	1	1	1	1	Trypsin
isotig00253	PF00089.20	8e-08	31.8	0	1.5e-07	30.9	0	1.5	1	1	1	2	2	1	1	Trypsin
isotig00254	PF06747.7	1.6e-05	24.4	5.8	2.5e-05	23.8	4	1.3	1	0	0	1	1	1	1	CHCH domain
isotig00254	PF02297.11	0.00042	19.9	6.1	0.00053	19.6	4.3	1.1	1	0	0	1	1	1	1	Cytochrome oxidase c subunit VIb
isotig00254	PF00089.20	8e-08	31.8	0	1.5e-07	30.9	0	1.5	1	1	1	2	2	1	1	Trypsin
isotig00255	PF06747.7	1.6e-05	24.4	5.8	2.5e-05	23.8	4	1.3	1	0	0	1	1	1	1	CHCH domain
isotig00255	PF02297.11	0.00042	19.9	6.1	0.00053	19.6	4.3	1.1	1	0	0	1	1	1	1	Cytochrome oxidase c subunit VIb
isotig00255	PF00089.20	8e-08	31.8	0	1.5e-07	30.9	0	1.5	1	1	1	2	2	1	1	Trypsin
isotig00256	PF06747.7	1.6e-05	24.4	5.8	2.5e-05	23.8	4	1.3	1	0	0	1	1	1	1	CHCH domain
isotig00256	PF02297.11	0.00042	19.9	6.1	0.00053	19.6	4.3	1.1	1	0	0	1	1	1	1	Cytochrome oxidase c subunit VIb
isotig00256	PF00089.20	8e-08	31.8	0	1.5e-07	30.9	0	1.5	1	1	1	2	2	1	1	Trypsin
isotig00257	PF06747.7	1.6e-05	24.4	5.8	2.5e-05	23.8	4	1.3	1	0	0	1	1	1	1	CHCH domain
isotig00257	PF02297.11	0.00042	19.9	6.1	0.00053	19.6	4.3	1.1	1	0	0	1	1	1	1	Cytochrome oxidase c subunit VIb
isotig00257	PF00089.20	8e-08	31.8	0	1.5e-07	30.9	0	1.5	1	1	1	2	2	1	1	Trypsin
isotig00261	PF00089.20	4.4e-13	49	0.1	5.4e-13	48.7	0.1	1	1	0	0	1	1	1	1	Trypsin
isotig00262	PF00089.20	4.4e-13	49	0.1	5.4e-13	48.7	0.1	1	1	0	0	1	1	1	1	Trypsin
isotig00264	PF00089.20	8e-08	31.8	0	1.5e-07	30.9	0	1.5	1	1	1	2	2	1	1	Trypsin
isotig00265	PF06747.7	1.6e-05	24.4	5.8	2.5e-05	23.8	4	1.3	1	0	0	1	1	1	1	CHCH domain
isotig00265	PF02297.11	0.00042	19.9	6.1	0.00053	19.6	4.3	1.1	1	0	0	1	1	1	1	Cytochrome oxidase c subunit VIb
isotig00266	PF06747.7	1.6e-05	24.4	5.8	2.5e-05	23.8	4	1.3	1	0	0	1	1	1	1	CHCH domain
isotig00266	PF02297.11	0.00042	19.9	6.1	0.00053	19.6	4.3	1.1	1	0	0	1	1	1	1	Cytochrome oxidase c subunit VIb
isotig00267	PF06747.7	1.6e-05	24.4	5.8	2.5e-05	23.8	4	1.3	1	0	0	1	1	1	1	CHCH domain
isotig00267	PF02297.11	0.00042	19.9	6.1	0.00053	19.6	4.3	1.1	1	0	0	1	1	1	1	Cytochrome oxidase c subunit VIb
isotig00268	PF06747.7	1.6e-05	24.4	5.8	2.5e-05	23.8	4	1.3	1	0	0	1	1	1	1	CHCH domain
isotig00268	PF02297.11	0.00042	19.9	6.1	0.00053	19.6	4.3	1.1	1	0	0	1	1	1	1	Cytochrome oxidase c subunit VIb
isotig00269	PF00089.20	8e-08	31.8	0	1.5e-07	30.9	0	1.5	1	1	1	2	2	1	1	Trypsin
isotig00271	PF06747.7	1.6e-05	24.4	5.8	2.5e-05	23.8	4	1.3	1	0	0	1	1	1	1	CHCH domain
isotig00271	PF02297.11	0.00042	19.9	6.1	0.00053	19.6	4.3	1.1	1	0	0	1	1	1	1	Cytochrome oxidase c subunit VIb
isotig00272	PF06747.7	1.6e-05	24.4	5.8	2.5e-05	23.8	4	1.3	1	0	0	1	1	1	1	CHCH domain
isotig00272	PF02297.11	0.00042	19.9	6.1	0.00053	19.6	4.3	1.1	1	0	0	1	1	1	1	Cytochrome oxidase c subunit VIb
isotig00273	PF06747.7	1.6e-05	24.4	5.8	2.5e-05	23.8	4	1.3	1	0	0	1	1	1	1	CHCH domain
isotig00273	PF02297.11	0.00042	19.9	6.1	0.00053	19.6	4.3	1.1	1	0	0	1	1	1	1	Cytochrome oxidase c subunit VIb
isotig00274	PF06747.7	1.6e-05	24.4	5.8	2.5e-05	23.8	4	1.3	1	0	0	1	1	1	1	CHCH domain
isotig00274	PF02297.11	0.00042	19.9	6.1	0.00053	19.6	4.3	1.1	1	0	0	1	1	1	1	Cytochrome oxidase c subunit VIb
isotig00279	PF06747.7	1.6e-05	24.4	5.8	2.5e-05	23.8	4	1.3	1	0	0	1	1	1	1	CHCH domain
isotig00279	PF02297.11	0.00042	19.9	6.1	0.00053	19.6	4.3	1.1	1	0	0	1	1	1	1	Cytochrome oxidase c subunit VIb
isotig00280	PF06747.7	1.6e-05	24.4	5.8	2.5e-05	23.8	4	1.3	1	0	0	1	1	1	1	CHCH domain
isotig00280	PF02297.11	0.00042	19.9	6.1	0.00053	19.6	4.3	1.1	1	0	0	1	1	1	1	Cytochrome oxidase c subunit VIb
isotig00281	PF06747.7	1.6e-05	24.4	5.8	2.5e-05	23.8	4	1.3	1	0	0	1	1	1	1	CHCH domain
isotig00281	PF02297.11	0.00042	19.9	6.1	0.00053	19.6	4.3	1.1	1	0	0	1	1	1	1	Cytochrome oxidase c subunit VIb
isotig00282	PF06747.7	1.6e-05	24.4	5.8	2.5e-05	23.8	4	1.3	1	0	0	1	1	1	1	CHCH domain
isotig00282	PF02297.11	0.00042	19.9	6.1	0.00053	19.6	4.3	1.1	1	0	0	1	1	1	1	Cytochrome oxidase c subunit VIb
isotig00285	PF06747.7	1.6e-05	24.4	5.8	2.5e-05	23.8	4	1.3	1	0	0	1	1	1	1	CHCH domain
isotig00285	PF02297.11	0.00042	19.9	6.1	0.00053	19.6	4.3	1.1	1	0	0	1	1	1	1	Cytochrome oxidase c subunit VIb
isotig00286	PF06747.7	1.6e-05	24.4	5.8	2.5e-05	23.8	4	1.3	1	0	0	1	1	1	1	CHCH domain
isotig00286	PF02297.11	0.00042	19.9	6.1	0.00053	19.6	4.3	1.1	1	0	0	1	1	1	1	Cytochrome oxidase c subunit VIb
isotig00287	PF06747.7	1.6e-05	24.4	5.8	2.5e-05	23.8	4	1.3	1	0	0	1	1	1	1	CHCH domain
isotig00287	PF02297.11	0.00042	19.9	6.1	0.00053	19.6	4.3	1.1	1	0	0	1	1	1	1	Cytochrome oxidase c subunit VIb
isotig00288	PF06747.7	1.6e-05	24.4	5.8	2.5e-05	23.8	4	1.3	1	0	0	1	1	1	1	CHCH domain
isotig00288	PF02297.11	0.00042	19.9	6.1	0.00053	19.6	4.3	1.1	1	0	0	1	1	1	1	Cytochrome oxidase c subunit VIb
isotig00376	PF01641.1	4e-51	171.6	0.1	5.2e-51	171.2	0	1.1	1	0	0	1	1	1	1	SelR domain
isotig00377	PF01641.1	4e-51	171.6	0.1	5.2e-51	171.2	0	1.1	1	0	0	1	1	1	1	SelR domain
isotig00380	PF01641.1	1.4e-51	173	0.1	1.6e-51	172.8	0	1	1	0	0	1	1	1	1	SelR domain
isotig00381	PF01641.1	1.4e-51	173	0.1	1.6e-51	172.8	0	1	1	0	0	1	1	1	1	SelR domain
isotig00382	PF01641.1	4e-51	171.6	0.1	5.2e-51	171.2	0	1.1	1	0	0	1	1	1	1	SelR domain
isotig00383	PF01641.1	4e-51	171.6	0.1	5.2e-51	171.2	0	1.1	1	0	0	1	1	1	1	SelR domain
isotig00386	PF01641.1	1.4e-51	173	0.1	1.6e-51	172.8	0	1	1	0	0	1	1	1	1	SelR domain
isotig00387	PF01641.1	1.4e-51	173	0.1	1.6e-51	172.8	0	1	1	0	0	1	1	1	1	SelR domain
isotig00404	PF01641.1	6.6e-43	145	0.1	8.6e-43	144.6	0	1.1	1	0	0	1	1	1	1	SelR domain
isotig00405	PF01641.1	4e-51	171.6	0.1	5.2e-51	171.2	0	1.1	1	0	0	1	1	1	1	SelR domain
isotig00412	PF01641.1	2e-43	146.7	0.1	2.2e-43	146.5	0	1	1	0	0	1	1	1	1	SelR domain
isotig00413	PF01641.1	1.4e-51	173	0.1	1.6e-51	172.8	0	1	1	0	0	1	1	1	1	SelR domain
isotig00457	PF01433.1	6.3e-21	74.5	0.2	5.7e-19	68.1	0	2.2	2	0	0	2	2	2	2	Peptidase family M1
isotig00458	PF01433.1	6.4e-21	74.5	0.2	5.7e-19	68.1	0	2.2	2	0	0	2	2	2	2	Peptidase family M1
isotig00459	PF01433.1	6.3e-21	74.5	0.2	5.7e-19	68.1	0	2.2	2	0	0	2	2	2	2	Peptidase family M1
isotig00460	PF01433.1	6.3e-21	74.5	0.2	5.7e-19	68.1	0	2.2	2	0	0	2	2	2	2	Peptidase family M1
isotig00461	PF01433.1	6.4e-21	74.5	0.2	5.7e-19	68.1	0	2.2	2	0	0	2	2	2	2	Peptidase family M1
isotig00462	PF01433.1	6.4e-21	74.5	0.2	5.7e-19	68.1	0	2.2	2	0	0	2	2	2	2	Peptidase family M1
isotig00463	PF01433.1	6.3e-21	74.5	0.2	5.7e-19	68.1	0	2.2	2	0	0	2	2	2	2	Peptidase family M1
isotig00464	PF01433.1	6.3e-21	74.5	0.2	5.7e-19	68.1	0	2.2	2	0	0	2	2	2	2	Peptidase family M1
isotig00465	PF01433.1	6.4e-21	74.5	0.2	5.7e-19	68.1	0	2.2	2	0	0	2	2	2	2	Peptidase family M1
isotig00466	PF01433.1	6.4e-21	74.5	0.2	5.7e-19	68.1	0	2.2	2	0	0	2	2	2	2	Peptidase family M1
isotig00467	PF01433.1	6.3e-21	74.5	0.2	5.7e-19	68.1	0	2.2	2	0	0	2	2	2	2	Peptidase family M1
isotig00468	PF01433.1	6.3e-21	74.5	0.2	5.7e-19	68.1	0	2.2	2	0	0	2	2	2	2	Peptidase family M1
isotig00469	PF01433.1	6.4e-21	74.5	0.2	5.7e-19	68.1	0	2.2	2	0	0	2	2	2	2	Peptidase family M1
isotig00470	PF01433.1	6.4e-21	74.5	0.2	5.7e-19	68.1	0	2.2	2	0	0	2	2	2	2	Peptidase family M1
isotig00511	PF10186.3	3e-05	22.8	8.5	3.7e-05	22.5	5.9	1.1	1	0	0	1	1	1	1	UV radiation resistance protein and autophagy-related subunit 14
isotig00512	PF10186.3	9.5e-05	21.2	8.4	0.00013	20.7	5.8	1.1	1	0	0	1	1	1	1	UV radiation resistance protein and autophagy-related subunit 14
isotig00513	PF10186.3	3.1e-05	22.8	8.5	3.7e-05	22.5	5.9	1.1	1	0	0	1	1	1	1	UV radiation resistance protein and autophagy-related subunit 14
isotig00522	PF00378.14	1.7e-47	160.6	0	2.3e-47	160.2	0	1.2	1	0	0	1	1	1	1	Enoyl-CoA hydratase/isomerase family
isotig00523	PF00378.14	1.7e-47	160.6	0	2.3e-47	160.2	0	1.2	1	0	0	1	1	1	1	Enoyl-CoA hydratase/isomerase family
isotig00524	PF00378.14	1.7e-47	160.6	0	2.3e-47	160.2	0	1.2	1	0	0	1	1	1	1	Enoyl-CoA hydratase/isomerase family
isotig00527	PF00378.14	1.7e-47	160.6	0	2.3e-47	160.2	0	1.2	1	0	0	1	1	1	1	Enoyl-CoA hydratase/isomerase family
isotig00528	PF00378.14	1.7e-47	160.6	0	2.3e-47	160.2	0	1.2	1	0	0	1	1	1	1	Enoyl-CoA hydratase/isomerase family
isotig00529	PF00378.14	1.7e-47	160.6	0	2.3e-47	160.2	0	1.2	1	0	0	1	1	1	1	Enoyl-CoA hydratase/isomerase family
isotig00553	PF00651.25	4.8e-10	39.1	0	8.7e-10	38.3	0	1.3	1	0	0	1	1	1	1	BTB/POZ domain
isotig00553	PF00415.12	3.4e-07	30.1	7.1	0.02	14.8	1.6	3.9	3	1	0	3	3	3	3	Regulator of chromosome condensation (RCC1) repeat
isotig00554	PF00651.25	6.8e-10	38.6	0	1.2e-09	37.8	0	1.3	1	0	0	1	1	1	1	BTB/POZ domain
isotig00554	PF00415.12	5.4e-07	29.4	12.5	0.03	14.2	1.6	5.6	5	1	0	5	5	2	2	Regulator of chromosome condensation (RCC1) repeat
isotig00555	PF00651.25	4.8e-10	39.1	0	8.7e-10	38.3	0	1.3	1	0	0	1	1	1	1	BTB/POZ domain
isotig00555	PF00415.12	3.4e-07	30.1	7.1	0.02	14.8	1.6	3.9	3	1	0	3	3	3	3	Regulator of chromosome condensation (RCC1) repeat
isotig00556	PF00651.25	6.8e-10	38.6	0	1.2e-09	37.8	0	1.3	1	0	0	1	1	1	1	BTB/POZ domain
isotig00556	PF00415.12	5.4e-07	29.4	12.5	0.03	14.2	1.6	5.6	5	1	0	5	5	2	2	Regulator of chromosome condensation (RCC1) repeat
isotig00557	PF00651.25	6.8e-10	38.6	0	1.2e-09	37.8	0	1.3	1	0	0	1	1	1	1	BTB/POZ domain
isotig00557	PF00415.12	5.4e-07	29.4	12.5	0.03	14.2	1.6	5.6	5	1	0	5	5	2	2	Regulator of chromosome condensation (RCC1) repeat
isotig00558	PF00651.25	6.8e-10	38.6	0	1.2e-09	37.8	0	1.3	1	0	0	1	1	1	1	BTB/POZ domain
isotig00558	PF00415.12	5.4e-07	29.4	12.5	0.03	14.2	1.6	5.6	5	1	0	5	5	2	2	Regulator of chromosome condensation (RCC1) repeat
isotig00559	PF00651.25	8.4e-10	38.3	0.1	1.4e-09	37.6	0.1	1.3	1	0	0	1	1	1	1	BTB/POZ domain
isotig00559	PF00415.12	9.4e-09	35.1	6.7	0.0033	17.3	1.6	3.8	3	1	0	3	3	3	3	Regulator of chromosome condensation (RCC1) repeat
isotig00560	PF00651.25	1.2e-09	37.8	0.1	2e-09	37.1	0.1	1.3	1	0	0	1	1	1	1	BTB/POZ domain
isotig00560	PF00415.12	1.4e-08	34.5	12	0.0047	16.8	1.7	5.5	5	1	0	5	5	3	3	Regulator of chromosome condensation (RCC1) repeat
isotig00561	PF00651.25	8.4e-10	38.3	0.1	1.4e-09	37.6	0.1	1.3	1	0	0	1	1	1	1	BTB/POZ domain
isotig00561	PF00415.12	9.4e-09	35.1	6.7	0.0033	17.3	1.6	3.8	3	1	0	3	3	3	3	Regulator of chromosome condensation (RCC1) repeat
isotig00562	PF00651.25	1.2e-09	37.8	0.1	2e-09	37.1	0.1	1.3	1	0	0	1	1	1	1	BTB/POZ domain
isotig00562	PF00415.12	1.4e-08	34.5	12	0.0047	16.8	1.7	5.5	5	1	0	5	5	3	3	Regulator of chromosome condensation (RCC1) repeat
isotig00563	PF00651.25	1.2e-09	37.8	0.1	2e-09	37.1	0.1	1.3	1	0	0	1	1	1	1	BTB/POZ domain
isotig00563	PF00415.12	1.4e-08	34.5	12	0.0047	16.8	1.7	5.5	5	1	0	5	5	3	3	Regulator of chromosome condensation (RCC1) repeat
isotig00564	PF00651.25	1.2e-09	37.8	0.1	2e-09	37.1	0.1	1.3	1	0	0	1	1	1	1	BTB/POZ domain
isotig00564	PF00415.12	1.4e-08	34.5	12	0.0047	16.8	1.7	5.5	5	1	0	5	5	3	3	Regulator of chromosome condensation (RCC1) repeat
isotig00569	PF00651.25	4.8e-10	39.1	0	8.7e-10	38.3	0	1.3	1	0	0	1	1	1	1	BTB/POZ domain
isotig00569	PF00415.12	3.4e-07	30.1	7.1	0.02	14.8	1.6	3.9	3	1	0	3	3	3	3	Regulator of chromosome condensation (RCC1) repeat
isotig00570	PF00651.25	4.8e-10	39.1	0	8.7e-10	38.3	0	1.3	1	0	0	1	1	1	1	BTB/POZ domain
isotig00570	PF00415.12	3.4e-07	30.1	7.1	0.02	14.8	1.6	3.9	3	1	0	3	3	3	3	Regulator of chromosome condensation (RCC1) repeat
isotig00571	PF00651.25	4.8e-10	39.1	0	8.7e-10	38.3	0	1.3	1	0	0	1	1	1	1	BTB/POZ domain
isotig00571	PF00415.12	3.4e-07	30.1	7.1	0.02	14.8	1.6	3.9	3	1	0	3	3	3	3	Regulator of chromosome condensation (RCC1) repeat
isotig00572	PF00651.25	4.8e-10	39.1	0	8.7e-10	38.3	0	1.3	1	0	0	1	1	1	1	BTB/POZ domain
isotig00572	PF00415.12	3.4e-07	30.1	7.1	0.02	14.8	1.6	3.9	3	1	0	3	3	3	3	Regulator of chromosome condensation (RCC1) repeat
isotig00573	PF00651.25	8.4e-10	38.3	0.1	1.4e-09	37.6	0.1	1.3	1	0	0	1	1	1	1	BTB/POZ domain
isotig00573	PF00415.12	9.4e-09	35.1	6.7	0.0033	17.3	1.6	3.8	3	1	0	3	3	3	3	Regulator of chromosome condensation (RCC1) repeat
isotig00574	PF00651.25	8.4e-10	38.3	0.1	1.4e-09	37.6	0.1	1.3	1	0	0	1	1	1	1	BTB/POZ domain
isotig00574	PF00415.12	9.4e-09	35.1	6.7	0.0033	17.3	1.6	3.8	3	1	0	3	3	3	3	Regulator of chromosome condensation (RCC1) repeat
isotig00575	PF00651.25	8.4e-10	38.3	0.1	1.4e-09	37.6	0.1	1.3	1	0	0	1	1	1	1	BTB/POZ domain
isotig00575	PF00415.12	9.4e-09	35.1	6.7	0.0033	17.3	1.6	3.8	3	1	0	3	3	3	3	Regulator of chromosome condensation (RCC1) repeat
isotig00576	PF00651.25	8.4e-10	38.3	0.1	1.4e-09	37.6	0.1	1.3	1	0	0	1	1	1	1	BTB/POZ domain
isotig00576	PF00415.12	9.4e-09	35.1	6.7	0.0033	17.3	1.6	3.8	3	1	0	3	3	3	3	Regulator of chromosome condensation (RCC1) repeat
isotig00580	PF00651.25	6.7e-10	38.7	0	1.5e-09	37.5	0	1.5	2	0	0	2	2	1	1	BTB/POZ domain
isotig00581	PF00651.25	6.7e-10	38.7	0	1.5e-09	37.5	0	1.5	2	0	0	2	2	1	1	BTB/POZ domain
isotig00582	PF00651.25	1.3e-10	41	0.1	2.1e-10	40.3	0	1.3	1	0	0	1	1	1	1	BTB/POZ domain
isotig00583	PF00651.25	1.3e-10	41	0.1	2.1e-10	40.3	0	1.3	1	0	0	1	1	1	1	BTB/POZ domain
isotig00627	PF02958.14	5.1e-63	212.6	0	6.3e-63	212.3	0	1.1	1	0	0	1	1	1	1	Domain of unknown function (DUF227)
isotig00627	PF01636.17	4.4e-07	29.6	0	1.2e-06	28.1	0	1.7	2	0	0	2	2	1	1	Phosphotransferase enzyme family
isotig00627	PF07914.5	1.4e-08	33.5	0	2.1e-08	32.9	0	1.3	1	0	0	1	1	1	1	Protein of unknown function (DUF1679)
isotig00628	PF02958.14	5.9e-49	166.5	0	7e-49	166.2	0	1	1	0	0	1	1	1	1	Domain of unknown function (DUF227)
isotig00629	PF02958.14	2.3e-61	207.2	0	3e-61	206.8	0	1.2	1	0	0	1	1	1	1	Domain of unknown function (DUF227)
isotig00629	PF01636.17	4.4e-06	26.3	0	1.1e-05	25	0	1.6	2	0	0	2	2	1	1	Phosphotransferase enzyme family
isotig00629	PF07914.5	2.3e-08	32.8	0	4.7e-08	31.7	0	1.5	2	0	0	2	2	1	1	Protein of unknown function (DUF1679)
isotig00630	PF02958.14	2.7e-63	213.6	0	3.3e-63	213.3	0	1.1	1	0	0	1	1	1	1	Domain of unknown function (DUF227)
isotig00630	PF01636.17	4.4e-07	29.6	0	1.2e-06	28.1	0	1.7	2	0	0	2	2	1	1	Phosphotransferase enzyme family
isotig00630	PF07914.5	1.3e-08	33.5	0	2.1e-08	32.9	0	1.3	1	0	0	1	1	1	1	Protein of unknown function (DUF1679)
isotig00631	PF02958.14	3.1e-49	167.4	0	3.7e-49	167.1	0	1	1	0	0	1	1	1	1	Domain of unknown function (DUF227)
isotig00632	PF02958.14	1.2e-61	208.1	0	1.6e-61	207.7	0	1.2	1	0	0	1	1	1	1	Domain of unknown function (DUF227)
isotig00632	PF01636.17	4.4e-06	26.3	0	1.1e-05	25	0	1.6	2	0	0	2	2	1	1	Phosphotransferase enzyme family
isotig00632	PF07914.5	2.3e-08	32.8	0	4.7e-08	31.7	0	1.5	2	0	0	2	2	1	1	Protein of unknown function (DUF1679)
isotig00633	PF01633.14	2.7e-05	23.5	0	0.00012	21.4	0	1.9	1	1	1	2	2	1	1	Choline/ethanolamine kinase
isotig00633	PF02958.14	1.5e-61	207.8	0	1.9e-61	207.5	0	1.1	1	0	0	1	1	1	1	Domain of unknown function (DUF227)
isotig00633	PF01636.17	5.6e-07	29.2	0	1.5e-06	27.8	0	1.6	2	0	0	2	2	1	1	Phosphotransferase enzyme family
isotig00633	PF07914.5	2.7e-08	32.6	0	4.2e-08	31.9	0	1.4	1	1	0	1	1	1	1	Protein of unknown function (DUF1679)
isotig00634	PF02958.14	5.1e-63	212.6	0	6.3e-63	212.3	0	1.1	1	0	0	1	1	1	1	Domain of unknown function (DUF227)
isotig00634	PF01636.17	4.4e-07	29.6	0	1.2e-06	28.1	0	1.7	2	0	0	2	2	1	1	Phosphotransferase enzyme family
isotig00634	PF07914.5	1.4e-08	33.5	0	2.1e-08	32.9	0	1.3	1	0	0	1	1	1	1	Protein of unknown function (DUF1679)
isotig00635	PF02958.14	5.9e-49	166.5	0	7e-49	166.2	0	1	1	0	0	1	1	1	1	Domain of unknown function (DUF227)
isotig00636	PF02958.14	2.7e-63	213.6	0	3.3e-63	213.3	0	1.1	1	0	0	1	1	1	1	Domain of unknown function (DUF227)
isotig00636	PF01636.17	4.4e-07	29.6	0	1.2e-06	28.1	0	1.7	2	0	0	2	2	1	1	Phosphotransferase enzyme family
isotig00636	PF07914.5	1.3e-08	33.5	0	2.1e-08	32.9	0	1.3	1	0	0	1	1	1	1	Protein of unknown function (DUF1679)
isotig00637	PF02958.14	3.1e-49	167.4	0	3.7e-49	167.1	0	1	1	0	0	1	1	1	1	Domain of unknown function (DUF227)
isotig00638	PF01633.14	2.7e-05	23.5	0	0.00012	21.4	0	1.9	1	1	1	2	2	1	1	Choline/ethanolamine kinase
isotig00638	PF02958.14	1.5e-61	207.8	0	1.9e-61	207.5	0	1.1	1	0	0	1	1	1	1	Domain of unknown function (DUF227)
isotig00638	PF01636.17	5.6e-07	29.2	0	1.5e-06	27.8	0	1.6	2	0	0	2	2	1	1	Phosphotransferase enzyme family
isotig00638	PF07914.5	2.7e-08	32.6	0	4.2e-08	31.9	0	1.4	1	1	0	1	1	1	1	Protein of unknown function (DUF1679)
isotig00639	PF02958.14	5.2e-63	212.6	0	6.5e-63	212.3	0	1.1	1	0	0	1	1	1	1	Domain of unknown function (DUF227)
isotig00639	PF01636.17	5.5e-07	29.3	0	1.3e-06	28.1	0	1.6	2	0	0	2	2	1	1	Phosphotransferase enzyme family
isotig00639	PF07914.5	2.1e-08	32.9	0	3.3e-08	32.3	0	1.3	1	0	0	1	1	1	1	Protein of unknown function (DUF1679)
isotig00640	PF02958.14	5.2e-63	212.6	0	6.5e-63	212.3	0	1.1	1	0	0	1	1	1	1	Domain of unknown function (DUF227)
isotig00640	PF01636.17	5.5e-07	29.3	0	1.3e-06	28.1	0	1.6	2	0	0	2	2	1	1	Phosphotransferase enzyme family
isotig00640	PF07914.5	2.1e-08	32.9	0	3.3e-08	32.3	0	1.3	1	0	0	1	1	1	1	Protein of unknown function (DUF1679)
isotig00641	PF02958.14	5.9e-49	166.5	0	7e-49	166.2	0	1	1	0	0	1	1	1	1	Domain of unknown function (DUF227)
isotig00642	PF02958.14	2.7e-63	213.5	0	3.4e-63	213.2	0	1.1	1	0	0	1	1	1	1	Domain of unknown function (DUF227)
isotig00642	PF01636.17	5.5e-07	29.2	0	1.3e-06	28.1	0	1.6	2	0	0	2	2	1	1	Phosphotransferase enzyme family
isotig00642	PF07914.5	2.1e-08	32.9	0	3.3e-08	32.3	0	1.3	1	0	0	1	1	1	1	Protein of unknown function (DUF1679)
isotig00643	PF02958.14	2.7e-63	213.5	0	3.4e-63	213.2	0	1.1	1	0	0	1	1	1	1	Domain of unknown function (DUF227)
isotig00643	PF01636.17	5.5e-07	29.2	0	1.3e-06	28.1	0	1.6	2	0	0	2	2	1	1	Phosphotransferase enzyme family
isotig00643	PF07914.5	2.1e-08	32.9	0	3.3e-08	32.3	0	1.3	1	0	0	1	1	1	1	Protein of unknown function (DUF1679)
isotig00644	PF02958.14	3.1e-49	167.4	0	3.7e-49	167.1	0	1	1	0	0	1	1	1	1	Domain of unknown function (DUF227)
isotig00645	PF02958.14	5.2e-63	212.6	0	6.5e-63	212.3	0	1.1	1	0	0	1	1	1	1	Domain of unknown function (DUF227)
isotig00645	PF01636.17	5.5e-07	29.3	0	1.3e-06	28.1	0	1.6	2	0	0	2	2	1	1	Phosphotransferase enzyme family
isotig00645	PF07914.5	2.1e-08	32.9	0	3.3e-08	32.3	0	1.3	1	0	0	1	1	1	1	Protein of unknown function (DUF1679)
isotig00646	PF02958.14	5.2e-63	212.6	0	6.5e-63	212.3	0	1.1	1	0	0	1	1	1	1	Domain of unknown function (DUF227)
isotig00646	PF01636.17	5.5e-07	29.3	0	1.3e-06	28.1	0	1.6	2	0	0	2	2	1	1	Phosphotransferase enzyme family
isotig00646	PF07914.5	2.1e-08	32.9	0	3.3e-08	32.3	0	1.3	1	0	0	1	1	1	1	Protein of unknown function (DUF1679)
isotig00647	PF02958.14	5.9e-49	166.5	0	7e-49	166.2	0	1	1	0	0	1	1	1	1	Domain of unknown function (DUF227)
isotig00648	PF02958.14	2.7e-63	213.5	0	3.4e-63	213.2	0	1.1	1	0	0	1	1	1	1	Domain of unknown function (DUF227)
isotig00648	PF01636.17	5.5e-07	29.2	0	1.3e-06	28.1	0	1.6	2	0	0	2	2	1	1	Phosphotransferase enzyme family
isotig00648	PF07914.5	2.1e-08	32.9	0	3.3e-08	32.3	0	1.3	1	0	0	1	1	1	1	Protein of unknown function (DUF1679)
isotig00649	PF02958.14	2.7e-63	213.5	0	3.4e-63	213.2	0	1.1	1	0	0	1	1	1	1	Domain of unknown function (DUF227)
isotig00649	PF01636.17	5.5e-07	29.2	0	1.3e-06	28.1	0	1.6	2	0	0	2	2	1	1	Phosphotransferase enzyme family
isotig00649	PF07914.5	2.1e-08	32.9	0	3.3e-08	32.3	0	1.3	1	0	0	1	1	1	1	Protein of unknown function (DUF1679)
isotig00650	PF02958.14	3.1e-49	167.4	0	3.7e-49	167.1	0	1	1	0	0	1	1	1	1	Domain of unknown function (DUF227)
isotig00651	PF01633.14	2.5e-05	23.6	0	0.0001	21.7	0	1.9	1	1	1	2	2	1	1	Choline/ethanolamine kinase
isotig00651	PF02958.14	1.5e-61	207.8	0	1.9e-61	207.5	0	1.1	1	0	0	1	1	1	1	Domain of unknown function (DUF227)
isotig00651	PF01636.17	6.9e-07	28.9	0	1.5e-06	27.8	0	1.5	2	0	0	2	2	1	1	Phosphotransferase enzyme family
isotig00651	PF07914.5	4.1e-08	32	0	6.8e-08	31.2	0	1.4	1	1	0	1	1	1	1	Protein of unknown function (DUF1679)
isotig00652	PF01633.14	2.5e-05	23.6	0	0.0001	21.7	0	1.9	1	1	1	2	2	1	1	Choline/ethanolamine kinase
isotig00652	PF02958.14	1.5e-61	207.8	0	1.9e-61	207.5	0	1.1	1	0	0	1	1	1	1	Domain of unknown function (DUF227)
isotig00652	PF01636.17	6.9e-07	28.9	0	1.5e-06	27.8	0	1.5	2	0	0	2	2	1	1	Phosphotransferase enzyme family
isotig00652	PF07914.5	4.1e-08	32	0	6.8e-08	31.2	0	1.4	1	1	0	1	1	1	1	Protein of unknown function (DUF1679)
isotig00653	PF01633.14	2.5e-05	23.6	0	0.0001	21.7	0	1.9	1	1	1	2	2	1	1	Choline/ethanolamine kinase
isotig00653	PF02958.14	1.5e-61	207.8	0	1.9e-61	207.5	0	1.1	1	0	0	1	1	1	1	Domain of unknown function (DUF227)
isotig00653	PF01636.17	6.9e-07	28.9	0	1.5e-06	27.8	0	1.5	2	0	0	2	2	1	1	Phosphotransferase enzyme family
isotig00653	PF07914.5	4.1e-08	32	0	6.8e-08	31.2	0	1.4	1	1	0	1	1	1	1	Protein of unknown function (DUF1679)
isotig00654	PF01633.14	2.5e-05	23.6	0	0.0001	21.7	0	1.9	1	1	1	2	2	1	1	Choline/ethanolamine kinase
isotig00654	PF02958.14	1.5e-61	207.8	0	1.9e-61	207.5	0	1.1	1	0	0	1	1	1	1	Domain of unknown function (DUF227)
isotig00654	PF01636.17	6.9e-07	28.9	0	1.5e-06	27.8	0	1.5	2	0	0	2	2	1	1	Phosphotransferase enzyme family
isotig00654	PF07914.5	4.1e-08	32	0	6.8e-08	31.2	0	1.4	1	1	0	1	1	1	1	Protein of unknown function (DUF1679)
isotig00655	PF01633.14	0.00015	21.1	0.1	0.00098	18.4	0	2	1	1	1	2	2	1	1	Choline/ethanolamine kinase
isotig00655	PF02958.14	2e-37	128.6	0	2.5e-37	128.3	0	1.1	1	0	0	1	1	1	1	Domain of unknown function (DUF227)
isotig00655	PF01636.17	1.4e-07	31.2	0	4.4e-07	29.6	0	1.7	2	0	0	2	2	1	1	Phosphotransferase enzyme family
isotig00655	PF07914.5	6.2e-09	34.6	0	8.2e-09	34.2	0	1.2	1	0	0	1	1	1	1	Protein of unknown function (DUF1679)
isotig00656	PF01633.14	0.00015	21.1	0.1	0.00098	18.4	0	2	1	1	1	2	2	1	1	Choline/ethanolamine kinase
isotig00656	PF02958.14	2e-37	128.6	0	2.5e-37	128.3	0	1.1	1	0	0	1	1	1	1	Domain of unknown function (DUF227)
isotig00656	PF01636.17	1.4e-07	31.2	0	4.4e-07	29.6	0	1.7	2	0	0	2	2	1	1	Phosphotransferase enzyme family
isotig00656	PF07914.5	6.2e-09	34.6	0	8.2e-09	34.2	0	1.2	1	0	0	1	1	1	1	Protein of unknown function (DUF1679)
isotig00657	PF01633.14	0.00014	21.2	0.1	0.00093	18.5	0	2	1	1	1	2	2	1	1	Choline/ethanolamine kinase
isotig00657	PF02958.14	2.1e-37	128.6	0	2.6e-37	128.2	0	1.1	1	0	0	1	1	1	1	Domain of unknown function (DUF227)
isotig00657	PF01636.17	1.9e-07	30.8	0	4.6e-07	29.5	0	1.6	2	0	0	2	2	1	1	Phosphotransferase enzyme family
isotig00657	PF07914.5	9.9e-09	34	0	1.3e-08	33.5	0	1.2	1	0	0	1	1	1	1	Protein of unknown function (DUF1679)
isotig00658	PF01633.14	0.00014	21.2	0.1	0.00093	18.5	0	2	1	1	1	2	2	1	1	Choline/ethanolamine kinase
isotig00658	PF02958.14	2.1e-37	128.6	0	2.6e-37	128.2	0	1.1	1	0	0	1	1	1	1	Domain of unknown function (DUF227)
isotig00658	PF01636.17	1.9e-07	30.8	0	4.6e-07	29.5	0	1.6	2	0	0	2	2	1	1	Phosphotransferase enzyme family
isotig00658	PF07914.5	9.9e-09	34	0	1.3e-08	33.5	0	1.2	1	0	0	1	1	1	1	Protein of unknown function (DUF1679)
isotig00659	PF01633.14	0.00014	21.2	0.1	0.00093	18.5	0	2	1	1	1	2	2	1	1	Choline/ethanolamine kinase
isotig00659	PF02958.14	2.1e-37	128.6	0	2.6e-37	128.2	0	1.1	1	0	0	1	1	1	1	Domain of unknown function (DUF227)
isotig00659	PF01636.17	1.9e-07	30.8	0	4.6e-07	29.5	0	1.6	2	0	0	2	2	1	1	Phosphotransferase enzyme family
isotig00659	PF07914.5	9.9e-09	34	0	1.3e-08	33.5	0	1.2	1	0	0	1	1	1	1	Protein of unknown function (DUF1679)
isotig00660	PF01633.14	0.00014	21.2	0.1	0.00093	18.5	0	2	1	1	1	2	2	1	1	Choline/ethanolamine kinase
isotig00660	PF02958.14	2.1e-37	128.6	0	2.6e-37	128.2	0	1.1	1	0	0	1	1	1	1	Domain of unknown function (DUF227)
isotig00660	PF01636.17	1.9e-07	30.8	0	4.6e-07	29.5	0	1.6	2	0	0	2	2	1	1	Phosphotransferase enzyme family
isotig00660	PF07914.5	9.9e-09	34	0	1.3e-08	33.5	0	1.2	1	0	0	1	1	1	1	Protein of unknown function (DUF1679)
isotig00661	PF02958.14	2.9e-61	206.9	0	3.6e-61	206.6	0	1	1	0	0	1	1	1	1	Domain of unknown function (DUF227)
isotig00661	PF01636.17	5.6e-07	29.2	0	8.2e-07	28.7	0	1.3	1	0	0	1	1	1	1	Phosphotransferase enzyme family
isotig00661	PF07914.5	2.2e-08	32.8	0	3.5e-08	32.2	0	1.3	1	0	0	1	1	1	1	Protein of unknown function (DUF1679)
isotig00662	PF02958.14	1.1e-48	165.6	0	1.5e-48	165.2	0	1.2	1	0	0	1	1	1	1	Domain of unknown function (DUF227)
isotig00663	PF02958.14	1.5e-61	207.8	0	1.9e-61	207.5	0	1	1	0	0	1	1	1	1	Domain of unknown function (DUF227)
isotig00663	PF01636.17	5.6e-07	29.2	0	8.2e-07	28.7	0	1.3	1	0	0	1	1	1	1	Phosphotransferase enzyme family
isotig00663	PF07914.5	2.2e-08	32.8	0	3.5e-08	32.2	0	1.3	1	0	0	1	1	1	1	Protein of unknown function (DUF1679)
isotig00664	PF02958.14	5.5e-49	166.6	0	7.7e-49	166.1	0	1.2	1	0	0	1	1	1	1	Domain of unknown function (DUF227)
isotig00665	PF02958.14	5.4e-59	199.4	0	6.2e-59	199.2	0	1	1	0	0	1	1	1	1	Domain of unknown function (DUF227)
isotig00665	PF01636.17	5e-07	29.4	0	7e-07	28.9	0	1.3	1	0	0	1	1	1	1	Phosphotransferase enzyme family
isotig00665	PF07914.5	3.1e-06	25.7	0	4.7e-06	25.2	0	1.3	1	0	0	1	1	1	1	Protein of unknown function (DUF1679)
isotig00666	PF02958.14	8.5e-60	202.1	0	1.1e-59	201.7	0	1	1	0	0	1	1	1	1	Domain of unknown function (DUF227)
isotig00666	PF01636.17	7.2e-07	28.9	0	1e-06	28.4	0	1.2	1	0	0	1	1	1	1	Phosphotransferase enzyme family
isotig00666	PF07914.5	4.3e-08	31.9	0	7.5e-08	31.1	0	1.4	1	1	0	1	1	1	1	Protein of unknown function (DUF1679)
isotig00667	PF02958.14	2.8e-59	200.3	0	3.3e-59	200.1	0	1	1	0	0	1	1	1	1	Domain of unknown function (DUF227)
isotig00667	PF01636.17	5e-07	29.4	0	7e-07	28.9	0	1.3	1	0	0	1	1	1	1	Phosphotransferase enzyme family
isotig00667	PF07914.5	3.1e-06	25.8	0	4.7e-06	25.2	0	1.3	1	0	0	1	1	1	1	Protein of unknown function (DUF1679)
isotig00668	PF02958.14	3.2e-61	206.7	0	4e-61	206.4	0	1	1	0	0	1	1	1	1	Domain of unknown function (DUF227)
isotig00668	PF01636.17	6e-07	29.1	0	8.8e-07	28.6	0	1.3	1	0	0	1	1	1	1	Phosphotransferase enzyme family
isotig00668	PF07914.5	2.4e-08	32.7	0	3.8e-08	32	0	1.3	1	0	0	1	1	1	1	Protein of unknown function (DUF1679)
isotig00669	PF02958.14	3e-62	210.1	0	3.7e-62	209.8	0	1.1	1	0	0	1	1	1	1	Domain of unknown function (DUF227)
isotig00669	PF01636.17	1.3e-06	28.1	0	2.3e-06	27.2	0	1.4	1	0	0	1	1	1	1	Phosphotransferase enzyme family
isotig00669	PF07914.5	1.2e-07	30.4	0	1.9e-07	29.7	0	1.3	1	0	0	1	1	1	1	Protein of unknown function (DUF1679)
isotig00670	PF02958.14	1.3e-48	165.4	0	1.7e-48	165	0	1.1	1	0	0	1	1	1	1	Domain of unknown function (DUF227)
isotig00671	PF02958.14	1.7e-61	207.7	0	2.1e-61	207.3	0	1	1	0	0	1	1	1	1	Domain of unknown function (DUF227)
isotig00671	PF01636.17	6e-07	29.1	0	8.8e-07	28.6	0	1.3	1	0	0	1	1	1	1	Phosphotransferase enzyme family
isotig00671	PF07914.5	2.4e-08	32.7	0	3.8e-08	32	0	1.3	1	0	0	1	1	1	1	Protein of unknown function (DUF1679)
isotig00672	PF02958.14	1.6e-62	211	0	2e-62	210.7	0	1.1	1	0	0	1	1	1	1	Domain of unknown function (DUF227)
isotig00672	PF01636.17	1.3e-06	28.1	0	2.3e-06	27.2	0	1.4	1	0	0	1	1	1	1	Phosphotransferase enzyme family
isotig00672	PF07914.5	1.2e-07	30.4	0	1.9e-07	29.7	0	1.3	1	0	0	1	1	1	1	Protein of unknown function (DUF1679)
isotig00673	PF02958.14	6.6e-49	166.3	0	8.9e-49	165.9	0	1.1	1	0	0	1	1	1	1	Domain of unknown function (DUF227)
isotig00674	PF01633.14	8.3e-05	21.9	0	0.00015	21.1	0	1.3	1	0	0	1	1	1	1	Choline/ethanolamine kinase
isotig00674	PF02958.14	1.6e-57	194.6	0	1.9e-57	194.4	0	1	1	0	0	1	1	1	1	Domain of unknown function (DUF227)
isotig00674	PF01636.17	6.6e-07	29	0	9.1e-07	28.5	0	1.2	1	0	0	1	1	1	1	Phosphotransferase enzyme family
isotig00674	PF07914.5	6.2e-06	24.8	0	1e-05	24	0	1.5	1	1	0	1	1	1	1	Protein of unknown function (DUF1679)
isotig00675	PF01633.14	5.1e-05	22.6	0	8.7e-05	21.9	0	1.3	1	0	0	1	1	1	1	Choline/ethanolamine kinase
isotig00675	PF02958.14	9.3e-60	201.9	0	1.2e-59	201.6	0	1	1	0	0	1	1	1	1	Domain of unknown function (DUF227)
isotig00675	PF01636.17	7.6e-07	28.8	0	1.1e-06	28.3	0	1.2	1	0	0	1	1	1	1	Phosphotransferase enzyme family
isotig00675	PF07914.5	4.6e-08	31.8	0	7.9e-08	31	0	1.4	1	1	0	1	1	1	1	Protein of unknown function (DUF1679)
isotig00676	PF02958.14	6.5e-52	176.2	0	8.1e-52	175.9	0	1.1	1	0	0	1	1	1	1	Domain of unknown function (DUF227)
isotig00676	PF07914.5	0.00023	19.6	0.1	0.00039	18.8	0	1.5	1	1	0	1	1	1	1	Protein of unknown function (DUF1679)
isotig00677	PF02958.14	3.4e-52	177.1	0	4.2e-52	176.8	0	1.1	1	0	0	1	1	1	1	Domain of unknown function (DUF227)
isotig00677	PF07914.5	0.00023	19.6	0.1	0.00039	18.8	0	1.5	1	1	0	1	1	1	1	Protein of unknown function (DUF1679)
isotig00678	PF02958.14	1e-35	123	0	1.2e-35	122.7	0	1	1	0	0	1	1	1	1	Domain of unknown function (DUF227)
isotig00678	PF01636.17	2e-07	30.7	0	2.4e-07	30.4	0	1.2	1	0	0	1	1	1	1	Phosphotransferase enzyme family
isotig00678	PF07914.5	9.8e-09	34	0	1.4e-08	33.5	0	1.2	1	0	0	1	1	1	1	Protein of unknown function (DUF1679)
isotig00679	PF01633.14	0.0003	20.1	0	0.00046	19.5	0	1.2	1	0	0	1	1	1	1	Choline/ethanolamine kinase
isotig00679	PF02958.14	1.3e-33	116.1	0	1.4e-33	116	0	1	1	0	0	1	1	1	1	Domain of unknown function (DUF227)
isotig00679	PF01636.17	1.2e-07	31.4	0	1.3e-07	31.3	0	1.2	1	0	0	1	1	1	1	Phosphotransferase enzyme family
isotig00679	PF07914.5	8.5e-07	27.6	0	1e-06	27.3	0	1.2	1	1	0	1	1	1	1	Protein of unknown function (DUF1679)
isotig00680	PF02958.14	1.2e-35	122.8	0	1.4e-35	122.5	0	1	1	0	0	1	1	1	1	Domain of unknown function (DUF227)
isotig00680	PF01636.17	2.3e-07	30.5	0	2.7e-07	30.2	0	1.2	1	0	0	1	1	1	1	Phosphotransferase enzyme family
isotig00680	PF07914.5	1.1e-08	33.8	0	1.6e-08	33.3	0	1.2	1	0	0	1	1	1	1	Protein of unknown function (DUF1679)
isotig00683	PF00560.27	2.1e-10	38.9	7.6	0.27	11.1	0	5.9	6	0	0	6	6	2	2	Leucine Rich Repeat
isotig00683	PF12799.1	2.3e-13	49.1	8.9	1e-06	27.9	0.2	4.2	1	1	4	5	5	4	4	Leucine Rich repeats (2 copies)
isotig00686	PF00560.27	2.1e-10	38.9	7.6	0.27	11.1	0	5.9	6	0	0	6	6	2	2	Leucine Rich Repeat
isotig00686	PF12799.1	2.3e-13	49.1	8.9	1e-06	27.9	0.2	4.2	1	1	4	5	5	4	4	Leucine Rich repeats (2 copies)
isotig00689	PF00560.27	2.1e-10	38.9	7.6	0.27	11.1	0	5.9	6	0	0	6	6	2	2	Leucine Rich Repeat
isotig00689	PF12799.1	2.3e-13	49.1	8.9	1e-06	27.9	0.2	4.2	1	1	4	5	5	4	4	Leucine Rich repeats (2 copies)
isotig00692	PF00560.27	2.1e-10	38.9	7.6	0.27	11.1	0	5.9	6	0	0	6	6	2	2	Leucine Rich Repeat
isotig00692	PF12799.1	2.3e-13	49.1	8.9	1e-06	27.9	0.2	4.2	1	1	4	5	5	4	4	Leucine Rich repeats (2 copies)
isotig00693	PF00560.27	2.1e-10	38.9	7.6	0.27	11.1	0	5.9	6	0	0	6	6	2	2	Leucine Rich Repeat
isotig00693	PF12799.1	2.3e-13	49.1	8.9	1e-06	27.9	0.2	4.2	1	1	4	5	5	4	4	Leucine Rich repeats (2 copies)
isotig00702	PF00560.27	2.1e-10	38.9	7.6	0.27	11.1	0	5.9	6	0	0	6	6	2	2	Leucine Rich Repeat
isotig00702	PF12799.1	2.3e-13	49.1	8.9	1e-06	27.9	0.2	4.2	1	1	4	5	5	4	4	Leucine Rich repeats (2 copies)
isotig00737	PF07859.7	0.00011	21.6	0.6	0.00036	19.9	0.4	1.8	1	1	0	1	1	1	1	alpha/beta hydrolase fold
isotig00737	PF00135.22	6.7e-116	387.8	0	8e-116	387.6	0	1	1	0	0	1	1	1	1	Carboxylesterase family
isotig00738	PF07859.7	0.00022	20.6	0.1	0.00037	19.8	0.1	1.3	1	0	0	1	1	1	1	alpha/beta hydrolase fold
isotig00738	PF00135.22	1.4e-36	126.1	0	1.5e-36	125.9	0	1	1	0	0	1	1	1	1	Carboxylesterase family
isotig00738	PF00135.22	1.2e-73	248.3	0.2	1.6e-73	248	0.1	1	1	0	0	1	1	1	1	Carboxylesterase family
isotig00739	PF07859.7	8.9e-05	21.8	0.5	0.00033	20	0.4	1.9	1	1	0	1	1	1	1	alpha/beta hydrolase fold
isotig00739	PF00135.22	5e-115	384.9	0.1	6.1e-115	384.7	0	1	1	0	0	1	1	1	1	Carboxylesterase family
isotig00739	PF07359.5	2.9e-05	23.3	0.1	4.3e-05	22.8	0.1	1.2	1	0	0	1	1	1	1	Liver-expressed antimicrobial peptide 2 precursor (LEAP-2)
isotig00740	PF07859.7	0.00018	20.8	0.1	0.00035	19.9	0.1	1.4	1	0	0	1	1	1	1	alpha/beta hydrolase fold
isotig00740	PF00135.22	9.2e-73	245.5	0.2	1.2e-72	245.1	0.2	1	1	0	0	1	1	1	1	Carboxylesterase family
isotig00740	PF00135.22	1.4e-36	126.1	0	1.5e-36	125.9	0	1	1	0	0	1	1	1	1	Carboxylesterase family
isotig00740	PF07359.5	2.9e-05	23.3	0.1	4.3e-05	22.8	0.1	1.2	1	0	0	1	1	1	1	Liver-expressed antimicrobial peptide 2 precursor (LEAP-2)
isotig00741	PF07859.7	8.9e-05	21.8	0.5	0.00033	20	0.4	1.9	1	1	0	1	1	1	1	alpha/beta hydrolase fold
isotig00741	PF00135.22	5e-115	384.9	0.1	6.1e-115	384.7	0	1	1	0	0	1	1	1	1	Carboxylesterase family
isotig00741	PF07359.5	2.9e-05	23.3	0.1	4.3e-05	22.8	0.1	1.2	1	0	0	1	1	1	1	Liver-expressed antimicrobial peptide 2 precursor (LEAP-2)
isotig00742	PF07859.7	8.9e-05	21.8	0.5	0.00033	20	0.4	1.9	1	1	0	1	1	1	1	alpha/beta hydrolase fold
isotig00742	PF00135.22	5e-115	384.9	0.1	6.1e-115	384.7	0	1	1	0	0	1	1	1	1	Carboxylesterase family
isotig00742	PF07359.5	2.9e-05	23.3	0.1	4.3e-05	22.8	0.1	1.2	1	0	0	1	1	1	1	Liver-expressed antimicrobial peptide 2 precursor (LEAP-2)
isotig00743	PF07859.7	0.00018	20.8	0.1	0.00035	19.9	0.1	1.4	1	0	0	1	1	1	1	alpha/beta hydrolase fold
isotig00743	PF00135.22	1.4e-36	126.1	0	1.5e-36	125.9	0	1	1	0	0	1	1	1	1	Carboxylesterase family
isotig00743	PF00135.22	9.2e-73	245.5	0.2	1.2e-72	245.1	0.2	1	1	0	0	1	1	1	1	Carboxylesterase family
isotig00743	PF07359.5	2.9e-05	23.3	0.1	4.3e-05	22.8	0.1	1.2	1	0	0	1	1	1	1	Liver-expressed antimicrobial peptide 2 precursor (LEAP-2)
isotig00744	PF07859.7	0.00018	20.8	0.1	0.00035	19.9	0.1	1.4	1	0	0	1	1	1	1	alpha/beta hydrolase fold
isotig00744	PF00135.22	9.2e-73	245.5	0.2	1.2e-72	245.1	0.2	1	1	0	0	1	1	1	1	Carboxylesterase family
isotig00744	PF00135.22	1.4e-36	126.1	0	1.5e-36	125.9	0	1	1	0	0	1	1	1	1	Carboxylesterase family
isotig00744	PF07359.5	2.9e-05	23.3	0.1	4.3e-05	22.8	0.1	1.2	1	0	0	1	1	1	1	Liver-expressed antimicrobial peptide 2 precursor (LEAP-2)
isotig00745	PF07859.7	0.00062	19.1	0.1	0.00062	19.1	0.1	1.1	1	0	0	1	1	1	1	alpha/beta hydrolase fold
isotig00745	PF00135.22	9.4e-19	67.2	0.5	1.1e-18	66.9	0.4	1	1	0	0	1	1	1	1	Carboxylesterase family
isotig00745	PF00135.22	1e-27	96.8	0.4	1.1e-27	96.6	0.3	1	1	0	0	1	1	1	1	Carboxylesterase family
isotig00746	PF00135.22	0.00015	20.4	0	0.00015	20.4	0	1	1	0	0	1	1	1	1	Carboxylesterase family
isotig00746	PF00135.22	1.3e-21	76.6	0.4	1.6e-21	76.4	0.3	1	1	0	0	1	1	1	1	Carboxylesterase family
isotig00746	PF07359.5	2.5e-05	23.5	0.1	4.1e-05	22.8	0.1	1.3	1	0	0	1	1	1	1	Liver-expressed antimicrobial peptide 2 precursor (LEAP-2)
isotig00747	PF00135.22	1.3e-21	76.6	0.4	1.6e-21	76.4	0.3	1	1	0	0	1	1	1	1	Carboxylesterase family
isotig00747	PF00135.22	0.00015	20.4	0	0.00015	20.4	0	1	1	0	0	1	1	1	1	Carboxylesterase family
isotig00747	PF07359.5	2.5e-05	23.5	0.1	4.1e-05	22.8	0.1	1.3	1	0	0	1	1	1	1	Liver-expressed antimicrobial peptide 2 precursor (LEAP-2)
isotig00748	PF00135.22	1.3e-21	76.6	0.4	1.6e-21	76.4	0.3	1	1	0	0	1	1	1	1	Carboxylesterase family
isotig00748	PF00135.22	0.00015	20.4	0	0.00015	20.4	0	1	1	0	0	1	1	1	1	Carboxylesterase family
isotig00748	PF07359.5	2.5e-05	23.5	0.1	4.1e-05	22.8	0.1	1.3	1	0	0	1	1	1	1	Liver-expressed antimicrobial peptide 2 precursor (LEAP-2)
isotig00749	PF07859.7	7.8e-05	22	0.6	0.00029	20.2	0.4	1.8	1	1	0	1	1	1	1	alpha/beta hydrolase fold
isotig00749	PF00135.22	4.7e-113	378.4	0	5.6e-113	378.2	0	1	1	0	0	1	1	1	1	Carboxylesterase family
isotig00750	PF07859.7	0.00016	21	0.1	0.00029	20.2	0.1	1.3	1	0	0	1	1	1	1	alpha/beta hydrolase fold
isotig00750	PF00135.22	1.4e-36	126.1	0	1.5e-36	125.9	0	1	1	0	0	1	1	1	1	Carboxylesterase family
isotig00750	PF00135.22	7.8e-71	239.1	0.2	9.9e-71	238.7	0.1	1	1	0	0	1	1	1	1	Carboxylesterase family
isotig00751	PF07859.7	7.2e-05	22.1	0.5	0.0003	20.1	0.4	1.9	1	1	0	1	1	1	1	alpha/beta hydrolase fold
isotig00751	PF00135.22	1.3e-109	367	0.2	4.4e-109	365.3	0.2	1.7	1	1	0	1	1	1	1	Carboxylesterase family
isotig00751	PF07359.5	2.9e-05	23.3	0.1	4.3e-05	22.8	0.1	1.2	1	0	0	1	1	1	1	Liver-expressed antimicrobial peptide 2 precursor (LEAP-2)
isotig00752	PF07859.7	7.3e-05	22.1	0.5	0.0003	20.1	0.4	1.9	1	1	0	1	1	1	1	alpha/beta hydrolase fold
isotig00752	PF00135.22	1.8e-109	366.6	0.3	5.9e-109	364.9	0.2	1.7	1	1	0	1	1	1	1	Carboxylesterase family
isotig00752	PF07359.5	2.8e-05	23.3	0.1	4.3e-05	22.8	0.1	1.3	1	0	0	1	1	1	1	Liver-expressed antimicrobial peptide 2 precursor (LEAP-2)
isotig00753	PF07859.7	0.00015	21.1	0.1	0.00029	20.2	0.1	1.4	1	0	0	1	1	1	1	alpha/beta hydrolase fold
isotig00753	PF00135.22	3.2e-67	227.2	1.2	1.4e-66	225.1	0.8	1.7	1	1	0	1	1	1	1	Carboxylesterase family
isotig00753	PF00135.22	1.4e-36	126.1	0	1.5e-36	125.9	0	1	1	0	0	1	1	1	1	Carboxylesterase family
isotig00753	PF07359.5	2.9e-05	23.3	0.1	4.3e-05	22.8	0.1	1.2	1	0	0	1	1	1	1	Liver-expressed antimicrobial peptide 2 precursor (LEAP-2)
isotig00754	PF07859.7	0.00015	21.1	0.1	0.00029	20.2	0.1	1.4	1	0	0	1	1	1	1	alpha/beta hydrolase fold
isotig00754	PF00135.22	1.4e-36	126.1	0	1.5e-36	125.9	0	1	1	0	0	1	1	1	1	Carboxylesterase family
isotig00754	PF00135.22	4.6e-67	226.6	1.3	2e-66	224.6	0.9	1.7	1	1	0	1	1	1	1	Carboxylesterase family
isotig00754	PF07359.5	2.8e-05	23.3	0.1	4.3e-05	22.8	0.1	1.3	1	0	0	1	1	1	1	Liver-expressed antimicrobial peptide 2 precursor (LEAP-2)
isotig00755	PF07859.7	6.7e-05	22.2	0.5	0.00026	20.3	0.3	1.9	1	1	0	1	1	1	1	alpha/beta hydrolase fold
isotig00755	PF00135.22	1.4e-106	357	0	1.7e-106	356.8	0	1	1	0	0	1	1	1	1	Carboxylesterase family
isotig00755	PF07359.5	2.9e-05	23.3	0.1	4.3e-05	22.8	0.1	1.2	1	0	0	1	1	1	1	Liver-expressed antimicrobial peptide 2 precursor (LEAP-2)
isotig00756	PF07859.7	6.8e-05	22.2	0.5	0.00026	20.3	0.3	1.9	1	1	0	1	1	1	1	alpha/beta hydrolase fold
isotig00756	PF00135.22	1.9e-106	356.6	0	2.3e-106	356.4	0	1	1	0	0	1	1	1	1	Carboxylesterase family
isotig00756	PF07359.5	2.8e-05	23.3	0.1	4.3e-05	22.8	0.1	1.3	1	0	0	1	1	1	1	Liver-expressed antimicrobial peptide 2 precursor (LEAP-2)
isotig00757	PF07859.7	0.00015	21.1	0.1	0.00027	20.3	0.1	1.4	1	0	0	1	1	1	1	alpha/beta hydrolase fold
isotig00757	PF00135.22	1.4e-36	126.1	0	1.5e-36	125.9	0	1	1	0	0	1	1	1	1	Carboxylesterase family
isotig00757	PF00135.22	2.2e-64	217.8	0.1	2.8e-64	217.5	0	1	1	0	0	1	1	1	1	Carboxylesterase family
isotig00757	PF07359.5	2.9e-05	23.3	0.1	4.3e-05	22.8	0.1	1.2	1	0	0	1	1	1	1	Liver-expressed antimicrobial peptide 2 precursor (LEAP-2)
isotig00758	PF07859.7	0.00015	21.1	0.1	0.00027	20.3	0.1	1.3	1	0	0	1	1	1	1	alpha/beta hydrolase fold
isotig00758	PF00135.22	2.9e-64	217.4	0.1	3.7e-64	217	0	1	1	0	0	1	1	1	1	Carboxylesterase family
isotig00758	PF00135.22	1.4e-36	126.1	0	1.5e-36	125.9	0	1	1	0	0	1	1	1	1	Carboxylesterase family
isotig00758	PF07359.5	2.8e-05	23.3	0.1	4.3e-05	22.8	0.1	1.3	1	0	0	1	1	1	1	Liver-expressed antimicrobial peptide 2 precursor (LEAP-2)
isotig00759	PF07859.7	5.7e-05	22.5	0.6	0.00024	20.4	0.4	1.9	1	1	0	1	1	1	1	alpha/beta hydrolase fold
isotig00759	PF00135.22	3.9e-102	342.4	0	4.7e-102	342.1	0	1	1	0	0	1	1	1	1	Carboxylesterase family
isotig00759	PF07359.5	2.9e-05	23.3	0.1	4.3e-05	22.8	0.1	1.2	1	0	0	1	1	1	1	Liver-expressed antimicrobial peptide 2 precursor (LEAP-2)
isotig00760	PF07859.7	0.00011	21.5	0.1	0.0002	20.7	0.1	1.4	1	0	0	1	1	1	1	alpha/beta hydrolase fold
isotig00760	PF00135.22	1.4e-36	126.1	0	1.5e-36	125.9	0	1	1	0	0	1	1	1	1	Carboxylesterase family
isotig00760	PF00135.22	5.6e-60	203.3	0	7.2e-60	202.9	0	1	1	0	0	1	1	1	1	Carboxylesterase family
isotig00760	PF07359.5	2.9e-05	23.3	0.1	4.3e-05	22.8	0.1	1.2	1	0	0	1	1	1	1	Liver-expressed antimicrobial peptide 2 precursor (LEAP-2)
isotig00763	PF07859.7	0.00062	19.1	0.1	0.00062	19.1	0.1	1.1	1	0	0	1	1	1	1	alpha/beta hydrolase fold
isotig00763	PF00135.22	1e-27	96.8	0.4	1.1e-27	96.6	0.3	1	1	0	0	1	1	1	1	Carboxylesterase family
isotig00763	PF00135.22	4.6e-16	58.3	0.5	5.5e-16	58.1	0.3	1	1	0	0	1	1	1	1	Carboxylesterase family
isotig00764	PF00135.22	0.00015	20.4	0	0.00015	20.4	0	1	1	0	0	1	1	1	1	Carboxylesterase family
isotig00764	PF00135.22	3.8e-16	58.6	1.6	1.9e-15	56.3	1.1	1.8	1	1	0	1	1	1	1	Carboxylesterase family
isotig00764	PF07359.5	2.5e-05	23.5	0.1	4.1e-05	22.8	0.1	1.3	1	0	0	1	1	1	1	Liver-expressed antimicrobial peptide 2 precursor (LEAP-2)
isotig00765	PF00135.22	0.00015	20.4	0	0.00015	20.4	0	1	1	0	0	1	1	1	1	Carboxylesterase family
isotig00765	PF00135.22	2.7e-13	49.2	0.1	3.2e-13	49	0.1	1	1	0	0	1	1	1	1	Carboxylesterase family
isotig00765	PF07359.5	2.5e-05	23.5	0.1	4.1e-05	22.8	0.1	1.3	1	0	0	1	1	1	1	Liver-expressed antimicrobial peptide 2 precursor (LEAP-2)
isotig00767	PF00135.22	0.00015	20.4	0	0.00015	20.4	0	1	1	0	0	1	1	1	1	Carboxylesterase family
isotig00767	PF00135.22	5.9e-09	34.9	0	7e-09	34.6	0	1	1	0	0	1	1	1	1	Carboxylesterase family
isotig00767	PF07359.5	2.5e-05	23.5	0.1	4.1e-05	22.8	0.1	1.3	1	0	0	1	1	1	1	Liver-expressed antimicrobial peptide 2 precursor (LEAP-2)
isotig00917	PF02480.10	5.3e-05	21.4	0	3.4	5.5	0	5.4	6	1	1	7	7	0	0	Alphaherpesvirus glycoprotein E
isotig00917	PF08204.5	1.1e-11	44.3	7	1.9	8	0	10.8	12	3	0	12	12	0	0	CD47 immunoglobulin-like domain
isotig00917	PF08204.5	2.9e-06	26.8	17.4	1.2	8.6	0.1	9.7	10	5	0	10	10	1	1	CD47 immunoglobulin-like domain
isotig00917	PF08205.6	3e-14	52.4	1.6	0.069	12.7	0	7.1	7	0	0	7	7	2	2	CD80-like C2-set immunoglobulin domain
isotig00917	PF08205.6	6e-14	51.4	2	0.2	11.3	0	11.3	13	0	0	13	13	1	1	CD80-like C2-set immunoglobulin domain
isotig00917	PF07654.9	3e-10	39.6	6.9	0.16	11.7	0	6.6	7	0	0	7	7	2	2	Immunoglobulin C1-set domain
isotig00917	PF07654.9	6e-43	144.4	0.1	0.00018	21.2	0	13.1	13	0	0	13	13	6	6	Immunoglobulin C1-set domain
isotig00917	PF07654.9	3.3e-17	62	0	0.38	10.5	0	9.4	9	1	0	9	9	2	2	Immunoglobulin C1-set domain
isotig00917	PF00047.19	1.3e-28	98.6	1.7	4.5e-07	29.6	0	7.6	7	1	0	7	7	4	4	Immunoglobulin domain
isotig00917	PF00047.19	4.5e-56	186.5	10.1	2.3e-05	24.1	0	13.7	13	0	0	13	13	11	11	Immunoglobulin domain
isotig00917	PF00047.19	2.1e-39	133.1	1.6	0.00031	20.5	0	11.4	11	0	0	11	11	6	6	Immunoglobulin domain
isotig00917	PF00047.19	6.6e-11	41.9	0.1	9.2e-05	22.2	0	2.8	3	0	0	3	3	2	2	Immunoglobulin domain
isotig00917	PF07679.10	2.7e-131	427.5	0	1.6e-24	85.3	0	7.5	7	0	0	7	7	7	7	Immunoglobulin I-set domain
isotig00917	PF07679.10	1.2e-219	710.6	0	3.4e-19	68.2	0	13.2	13	0	0	13	13	13	13	Immunoglobulin I-set domain
isotig00917	PF07679.10	4e-146	475	0	1.8e-14	53.1	0	10.2	10	0	0	10	10	10	10	Immunoglobulin I-set domain
isotig00917	PF07679.10	1.7e-40	136.5	0	1e-14	53.9	0	4.1	4	0	0	4	4	3	3	Immunoglobulin I-set domain
isotig00917	PF07686.11	9.5e-20	70.3	10.8	9.5e-05	22	0	9.5	8	6	0	8	8	4	4	Immunoglobulin V-set domain
isotig00917	PF07686.11	1.7e-56	188.7	5.7	0.00019	21	0	16.3	13	6	0	13	13	10	10	Immunoglobulin V-set domain
isotig00917	PF07686.11	2e-32	111.1	2.6	0.0093	15.5	0.1	12.1	9	5	0	10	10	6	6	Immunoglobulin V-set domain
isotig00917	PF07686.11	3.1e-09	36.4	0.2	0.00016	21.2	0	3.8	3	2	0	3	3	2	2	Immunoglobulin V-set domain
isotig00917	PF11465.2	0.00013	21.5	0.3	3.5	7.3	0	5.8	7	0	0	7	7	0	0	Natural killer cell receptor 2B4
isotig00917	PF06832.6	2e-25	88.2	0.7	0.32	10.7	0	13.4	13	0	0	13	13	2	2	Penicillin-Binding Protein C-terminus Family
isotig00917	PF06832.6	1.6e-13	50.1	0	0.54	9.9	0	9.1	9	0	0	9	9	1	1	Penicillin-Binding Protein C-terminus Family
isotig00917	PF06582.6	6e-07	28.6	0.3	2.1e-06	26.9	0.2	2	1	0	0	1	1	1	1	Repeat of unknown function (DUF1136)
isotig00917	PF06582.6	2.2e-61	201.8	66	1.6e-11	43.2	0.1	9.6	9	0	0	9	9	9	9	Repeat of unknown function (DUF1136)
isotig00917	PF06582.6	1.8e-29	100.3	28.7	3e-06	26.4	0.3	8.3	8	0	0	8	8	5	5	Repeat of unknown function (DUF1136)
isotig00917	PF06582.6	2e-25	87.4	24.9	3.8e-09	35.6	2.5	4.3	4	1	0	4	4	3	3	Repeat of unknown function (DUF1136)
isotig00918	PF02480.10	5.1e-05	21.4	0	3.4	5.5	0	5.4	6	1	1	7	7	0	0	Alphaherpesvirus glycoprotein E
isotig00918	PF02368.12	0.00097	18.7	0	10	5.8	0	4.4	5	0	0	5	5	0	0	Bacterial Ig-like domain (group 2)
isotig00918	PF08204.5	1.1e-11	44.3	7	1.9	8	0	10.8	12	3	0	12	12	0	0	CD47 immunoglobulin-like domain
isotig00918	PF08204.5	2.5e-06	27	17.3	1.2	8.6	0.1	9.7	10	5	0	10	10	1	1	CD47 immunoglobulin-like domain
isotig00918	PF08205.6	6e-14	51.4	2	0.2	11.3	0	11.3	13	0	0	13	13	1	1	CD80-like C2-set immunoglobulin domain
isotig00918	PF08205.6	3e-14	52.4	1.6	0.069	12.7	0	7.1	7	0	0	7	7	2	2	CD80-like C2-set immunoglobulin domain
isotig00918	PF07654.9	6e-43	144.4	0.1	0.00018	21.2	0	13.1	13	0	0	13	13	6	6	Immunoglobulin C1-set domain
isotig00918	PF07654.9	3e-10	39.6	6.9	0.16	11.7	0	6.6	7	0	0	7	7	2	2	Immunoglobulin C1-set domain
isotig00918	PF07654.9	3e-17	62.1	0	0.37	10.5	0	9.4	9	1	0	9	9	2	2	Immunoglobulin C1-set domain
isotig00918	PF00047.19	6.6e-11	41.9	0.1	9.2e-05	22.2	0	2.8	3	0	0	3	3	2	2	Immunoglobulin domain
isotig00918	PF00047.19	4.5e-56	186.5	10.1	2.3e-05	24.1	0	13.7	13	0	0	13	13	11	11	Immunoglobulin domain
isotig00918	PF00047.19	1.3e-28	98.6	1.7	4.5e-07	29.6	0	7.6	7	1	0	7	7	4	4	Immunoglobulin domain
isotig00918	PF00047.19	1.9e-39	133.3	1.6	0.00031	20.5	0	11.4	11	0	0	11	11	6	6	Immunoglobulin domain
isotig00918	PF07679.10	1.7e-40	136.5	0	1e-14	53.9	0	4.1	4	0	0	4	4	3	3	Immunoglobulin I-set domain
isotig00918	PF07679.10	1.2e-219	710.6	0	3.4e-19	68.2	0	13.2	13	0	0	13	13	13	13	Immunoglobulin I-set domain
isotig00918	PF07679.10	2.7e-131	427.5	0	1.6e-24	85.3	0	7.5	7	0	0	7	7	7	7	Immunoglobulin I-set domain
isotig00918	PF07679.10	3e-146	475.4	0	1.8e-14	53.1	0	10.2	10	0	0	10	10	10	10	Immunoglobulin I-set domain
isotig00918	PF07686.11	3.1e-09	36.4	0.2	0.00016	21.2	0	3.8	3	2	0	3	3	2	2	Immunoglobulin V-set domain
isotig00918	PF07686.11	1.7e-56	188.7	5.7	0.00019	21	0	16.3	13	6	0	13	13	10	10	Immunoglobulin V-set domain
isotig00918	PF07686.11	9.5e-20	70.3	10.8	9.5e-05	22	0	9.5	8	6	0	8	8	4	4	Immunoglobulin V-set domain
isotig00918	PF07686.11	1.8e-32	111.3	2.6	0.0092	15.6	0.1	12.1	9	5	0	10	10	6	6	Immunoglobulin V-set domain
isotig00918	PF11465.2	0.00012	21.6	0.3	3.4	7.3	0	5.8	7	0	0	7	7	0	0	Natural killer cell receptor 2B4
isotig00918	PF06832.6	2e-25	88.2	0.7	0.32	10.7	0	13.4	13	0	0	13	13	2	2	Penicillin-Binding Protein C-terminus Family
isotig00918	PF06832.6	1.4e-13	50.2	0	0.53	9.9	0	9.1	9	0	0	9	9	1	1	Penicillin-Binding Protein C-terminus Family
isotig00918	PF06582.6	2e-25	87.4	24.9	3.8e-09	35.6	2.5	4.3	4	1	0	4	4	3	3	Repeat of unknown function (DUF1136)
isotig00918	PF06582.6	2.2e-61	201.8	66	1.6e-11	43.2	0.1	9.6	9	0	0	9	9	9	9	Repeat of unknown function (DUF1136)
isotig00918	PF06582.6	6e-07	28.6	0.3	2.1e-06	26.9	0.2	2	1	0	0	1	1	1	1	Repeat of unknown function (DUF1136)
isotig00918	PF06582.6	1.7e-29	100.4	28.7	3e-06	26.4	0.3	8.3	8	0	0	8	8	5	5	Repeat of unknown function (DUF1136)
isotig00919	PF02480.10	1.6e-07	29.7	0.1	3.7	5.4	0	6.8	7	1	0	8	8	0	0	Alphaherpesvirus glycoprotein E
isotig00919	PF08204.5	1.1e-11	44.3	7	1.9	8	0	10.8	12	3	0	12	12	0	0	CD47 immunoglobulin-like domain
isotig00919	PF08204.5	1.2e-07	31.2	16.5	1.6	8.2	0	11	12	3	0	12	12	0	0	CD47 immunoglobulin-like domain
isotig00919	PF08205.6	3e-14	52.4	1.6	0.069	12.7	0	7.1	7	0	0	7	7	2	2	CD80-like C2-set immunoglobulin domain
isotig00919	PF08205.6	6e-14	51.4	2	0.2	11.3	0	11.3	13	0	0	13	13	1	1	CD80-like C2-set immunoglobulin domain
isotig00919	PF07654.9	3e-10	39.6	6.9	0.16	11.7	0	6.6	7	0	0	7	7	2	2	Immunoglobulin C1-set domain
isotig00919	PF07654.9	6e-43	144.4	0.1	0.00018	21.2	0	13.1	13	0	0	13	13	6	6	Immunoglobulin C1-set domain
isotig00919	PF07654.9	7.3e-20	70.5	0.1	0.53	10	0	11.6	12	1	0	12	12	2	2	Immunoglobulin C1-set domain
isotig00919	PF00047.19	1.3e-28	98.6	1.7	4.5e-07	29.6	0	7.6	7	1	0	7	7	4	4	Immunoglobulin domain
isotig00919	PF00047.19	4.5e-56	186.5	10.1	2.3e-05	24.1	0	13.7	13	0	0	13	13	11	11	Immunoglobulin domain
isotig00919	PF00047.19	5.3e-50	167.1	5.5	0.00044	20	0	13.3	13	0	0	13	13	9	9	Immunoglobulin domain
isotig00919	PF07679.10	2.7e-131	427.5	0	1.6e-24	85.3	0	7.5	7	0	0	7	7	7	7	Immunoglobulin I-set domain
isotig00919	PF07679.10	1.2e-219	710.6	0	3.4e-19	68.2	0	13.2	13	0	0	13	13	13	13	Immunoglobulin I-set domain
isotig00919	PF07679.10	1.8e-191	620.3	0	2.5e-14	52.6	0	13.2	13	0	0	13	13	13	13	Immunoglobulin I-set domain
isotig00919	PF07686.11	9.5e-20	70.3	10.8	9.5e-05	22	0	9.5	8	6	0	8	8	4	4	Immunoglobulin V-set domain
isotig00919	PF07686.11	1.7e-56	188.7	5.7	0.00019	21	0	16.3	13	6	0	13	13	10	10	Immunoglobulin V-set domain
isotig00919	PF07686.11	8.2e-42	141.4	5.4	0.0011	18.6	0	14.4	12	4	0	13	13	8	8	Immunoglobulin V-set domain
isotig00919	PF11465.2	1.6e-06	27.7	2.6	4.8	6.8	0	8	10	0	0	10	10	0	0	Natural killer cell receptor 2B4
isotig00919	PF06832.6	2e-25	88.2	0.7	0.32	10.7	0	13.4	13	0	0	13	13	2	2	Penicillin-Binding Protein C-terminus Family
isotig00919	PF06832.6	3.6e-15	55.3	0	0.76	9.4	0	11.3	13	0	0	13	13	1	1	Penicillin-Binding Protein C-terminus Family
isotig00919	PF06582.6	6e-07	28.6	0.3	2.1e-06	26.9	0.2	2	1	0	0	1	1	1	1	Repeat of unknown function (DUF1136)
isotig00919	PF06582.6	2.2e-61	201.8	66	1.6e-11	43.2	0.1	9.6	9	0	0	9	9	9	9	Repeat of unknown function (DUF1136)
isotig00919	PF06582.6	1.5e-50	167.4	63.1	1.9e-08	33.4	2.5	11.6	12	0	0	12	12	8	8	Repeat of unknown function (DUF1136)
isotig00920	PF02480.10	1.5e-07	29.7	0.1	3.7	5.4	0	6.8	7	1	0	8	8	0	0	Alphaherpesvirus glycoprotein E
isotig00920	PF08204.5	1.1e-11	44.3	7	1.9	8	0	10.8	12	3	0	12	12	0	0	CD47 immunoglobulin-like domain
isotig00920	PF08204.5	1.1e-07	31.4	16.5	1.6	8.2	0	11.1	12	3	0	12	12	0	0	CD47 immunoglobulin-like domain
isotig00920	PF08205.6	3e-14	52.4	1.6	0.069	12.7	0	7.1	7	0	0	7	7	2	2	CD80-like C2-set immunoglobulin domain
isotig00920	PF08205.6	6e-14	51.4	2	0.2	11.3	0	11.3	13	0	0	13	13	1	1	CD80-like C2-set immunoglobulin domain
isotig00920	PF07654.9	3e-10	39.6	6.9	0.16	11.7	0	6.6	7	0	0	7	7	2	2	Immunoglobulin C1-set domain
isotig00920	PF07654.9	6e-43	144.4	0.1	0.00018	21.2	0	13.1	13	0	0	13	13	6	6	Immunoglobulin C1-set domain
isotig00920	PF07654.9	6.6e-20	70.6	0.1	0.53	10	0	11.6	12	1	0	12	12	2	2	Immunoglobulin C1-set domain
isotig00920	PF00047.19	1.3e-28	98.6	1.7	4.5e-07	29.6	0	7.6	7	1	0	7	7	4	4	Immunoglobulin domain
isotig00920	PF00047.19	4.5e-56	186.5	10.1	2.3e-05	24.1	0	13.7	13	0	0	13	13	11	11	Immunoglobulin domain
isotig00920	PF00047.19	4.8e-50	167.2	5.5	0.00043	20	0	13.3	13	0	0	13	13	9	9	Immunoglobulin domain
isotig00920	PF07679.10	2.7e-131	427.5	0	1.6e-24	85.3	0	7.5	7	0	0	7	7	7	7	Immunoglobulin I-set domain
isotig00920	PF07679.10	1.2e-219	710.6	0	3.4e-19	68.2	0	13.2	13	0	0	13	13	13	13	Immunoglobulin I-set domain
isotig00920	PF07679.10	1.3e-191	620.8	0	2.5e-14	52.6	0	13.2	13	0	0	13	13	13	13	Immunoglobulin I-set domain
isotig00920	PF07686.11	9.5e-20	70.3	10.8	9.5e-05	22	0	9.5	8	6	0	8	8	4	4	Immunoglobulin V-set domain
isotig00920	PF07686.11	1.7e-56	188.7	5.7	0.00019	21	0	16.3	13	6	0	13	13	10	10	Immunoglobulin V-set domain
isotig00920	PF07686.11	8.3e-42	141.4	5.6	0.0011	18.6	0	14.4	12	4	0	13	13	8	8	Immunoglobulin V-set domain
isotig00920	PF11465.2	2.6e-06	27	3.4	4.8	6.8	0	8	11	0	0	11	11	0	0	Natural killer cell receptor 2B4
isotig00920	PF06832.6	2e-25	88.2	0.7	0.32	10.7	0	13.4	13	0	0	13	13	2	2	Penicillin-Binding Protein C-terminus Family
isotig00920	PF06832.6	3.2e-15	55.5	0	0.75	9.4	0	11.3	13	0	0	13	13	1	1	Penicillin-Binding Protein C-terminus Family
isotig00920	PF06582.6	6e-07	28.6	0.3	2.1e-06	26.9	0.2	2	1	0	0	1	1	1	1	Repeat of unknown function (DUF1136)
isotig00920	PF06582.6	2.2e-61	201.8	66	1.6e-11	43.2	0.1	9.6	9	0	0	9	9	9	9	Repeat of unknown function (DUF1136)
isotig00920	PF06582.6	1.3e-50	167.5	63.1	1.9e-08	33.4	2.5	11.6	12	0	0	12	12	8	8	Repeat of unknown function (DUF1136)
isotig00921	PF01553.15	2e-07	30.3	0	3.7e-07	29.4	0	1.4	1	0	0	1	1	1	1	Acyltransferase
isotig00921	PF08205.6	1e-07	31.4	0.5	0.0011	18.5	0	2.7	2	0	0	2	2	2	2	CD80-like C2-set immunoglobulin domain
isotig00921	PF00041.15	1e-63	211.1	14	6.5e-14	51.5	0.2	6	6	0	0	6	6	5	5	Fibronectin type III domain
isotig00921	PF00047.19	4.3e-09	36	0.4	0.0027	17.5	0.2	3.8	3	2	0	3	3	1	1	Immunoglobulin domain
isotig00921	PF00047.19	3.8e-10	39.4	13.5	5.6e-06	26.1	0	5.3	5	0	0	5	5	2	2	Immunoglobulin domain
isotig00921	PF00047.19	0.001	18.9	0	0.0021	17.8	0	1.6	1	0	0	1	1	1	1	Immunoglobulin domain
isotig00921	PF00047.19	2.7e-08	33.5	0	1.2e-07	31.4	0	2.2	2	0	0	2	2	1	1	Immunoglobulin domain
isotig00921	PF00047.19	8.4e-05	22.3	0.5	0.39	10.6	0	3.5	4	0	0	4	4	1	1	Immunoglobulin domain
isotig00921	PF07679.10	1.6e-27	94.9	3.3	2.1e-10	40	0.4	3	3	0	0	3	3	3	3	Immunoglobulin I-set domain
isotig00921	PF07679.10	8e-14	51	0.1	2.4e-13	49.4	0	1.6	2	0	0	2	2	1	1	Immunoglobulin I-set domain
isotig00921	PF07679.10	3.2e-52	174	6	1.6e-17	62.8	0	5.5	6	0	0	6	6	3	3	Immunoglobulin I-set domain
isotig00921	PF07679.10	2.7e-09	36.5	0.1	4.3e-09	35.8	0	1.3	1	0	0	1	1	1	1	Immunoglobulin I-set domain
isotig00921	PF07679.10	2.6e-22	78.2	0	1.5e-21	75.7	0	2.5	1	0	0	1	1	1	1	Immunoglobulin I-set domain
isotig00921	PF07679.10	2.7e-28	97.4	4.4	7e-19	67.2	0.1	3.1	3	0	0	3	3	3	3	Immunoglobulin I-set domain
isotig00921	PF07686.11	1.9e-10	40.3	1.1	1.2e-05	24.9	0.5	4	3	2	0	3	3	1	1	Immunoglobulin V-set domain
isotig00921	PF07686.11	5.3e-06	26	0.1	1.9e-05	24.2	0.1	1.8	1	1	0	1	1	1	1	Immunoglobulin V-set domain
isotig00921	PF07686.11	6.3e-11	41.9	2.9	0.0054	16.3	0	4.7	4	1	0	4	4	3	3	Immunoglobulin V-set domain
isotig00921	PF07686.11	3.9e-06	26.4	0	3e-05	23.6	0	2.6	1	0	0	1	1	1	1	Immunoglobulin V-set domain
isotig00921	PF07686.11	2.5e-05	23.8	0.1	0.11	12.1	0	2.7	1	1	0	2	2	2	2	Immunoglobulin V-set domain
isotig00921	PF11465.2	8e-06	25.4	1.9	1.5	8.5	0	4.5	4	0	0	4	4	1	1	Natural killer cell receptor 2B4
isotig00921	PF00018.22	2.1e-10	39.5	0.9	5e-10	38.3	0.1	2	2	0	0	2	2	1	1	SH3 domain
isotig00921	PF07653.11	2.2e-06	26.7	0	4.9e-06	25.6	0	1.5	1	0	0	1	1	1	1	Variant SH3 domain
isotig00922	PF08205.6	1e-07	31.4	0.5	0.0011	18.5	0	2.7	2	0	0	2	2	2	2	CD80-like C2-set immunoglobulin domain
isotig00922	PF00041.15	1e-63	211.1	14	6.5e-14	51.5	0.2	6	6	0	0	6	6	5	5	Fibronectin type III domain
isotig00922	PF00047.19	3.8e-10	39.4	13.5	5.6e-06	26.1	0	5.3	5	0	0	5	5	2	2	Immunoglobulin domain
isotig00922	PF00047.19	8.4e-05	22.3	0.5	0.39	10.6	0	3.5	4	0	0	4	4	1	1	Immunoglobulin domain
isotig00922	PF00047.19	0.001	18.9	0	0.0021	17.8	0	1.6	1	0	0	1	1	1	1	Immunoglobulin domain
isotig00922	PF00047.19	2.7e-08	33.5	0	1.2e-07	31.4	0	2.2	2	0	0	2	2	1	1	Immunoglobulin domain
isotig00922	PF00047.19	4.3e-09	36	0.4	0.0027	17.5	0.2	3.8	3	2	0	3	3	1	1	Immunoglobulin domain
isotig00922	PF07679.10	3.2e-52	174	6	1.6e-17	62.8	0	5.5	6	0	0	6	6	3	3	Immunoglobulin I-set domain
isotig00922	PF07679.10	2.7e-28	97.4	4.4	7e-19	67.2	0.1	3.1	3	0	0	3	3	3	3	Immunoglobulin I-set domain
isotig00922	PF07679.10	2.7e-09	36.5	0.1	4.3e-09	35.8	0	1.3	1	0	0	1	1	1	1	Immunoglobulin I-set domain
isotig00922	PF07679.10	8e-14	51	0.1	2.4e-13	49.4	0	1.6	2	0	0	2	2	1	1	Immunoglobulin I-set domain
isotig00922	PF07679.10	2.6e-22	78.2	0	1.5e-21	75.7	0	2.5	1	0	0	1	1	1	1	Immunoglobulin I-set domain
isotig00922	PF07679.10	1.6e-27	94.9	3.3	2.1e-10	40	0.4	3	3	0	0	3	3	3	3	Immunoglobulin I-set domain
isotig00922	PF07686.11	6.3e-11	41.9	2.9	0.0054	16.3	0	4.7	4	1	0	4	4	3	3	Immunoglobulin V-set domain
isotig00922	PF07686.11	2.5e-05	23.8	0.1	0.11	12.1	0	2.7	1	1	0	2	2	2	2	Immunoglobulin V-set domain
isotig00922	PF07686.11	5.3e-06	26	0.1	1.9e-05	24.2	0.1	1.8	1	1	0	1	1	1	1	Immunoglobulin V-set domain
isotig00922	PF07686.11	3.9e-06	26.4	0	3e-05	23.6	0	2.6	1	0	0	1	1	1	1	Immunoglobulin V-set domain
isotig00922	PF07686.11	1.9e-10	40.3	1.1	1.2e-05	24.9	0.5	4	3	2	0	3	3	1	1	Immunoglobulin V-set domain
isotig00922	PF11465.2	8e-06	25.4	1.9	1.5	8.5	0	4.5	4	0	0	4	4	1	1	Natural killer cell receptor 2B4
isotig00922	PF00018.22	2.1e-10	39.5	0.9	5e-10	38.3	0.1	2	2	0	0	2	2	1	1	SH3 domain
isotig00922	PF07653.11	2.2e-06	26.7	0	4.9e-06	25.6	0	1.5	1	0	0	1	1	1	1	Variant SH3 domain
isotig00923	PF01553.15	2e-07	30.3	0	3.7e-07	29.4	0	1.4	1	0	0	1	1	1	1	Acyltransferase
isotig00923	PF00047.19	2.7e-08	33.5	0	1.2e-07	31.4	0	2.2	2	0	0	2	2	1	1	Immunoglobulin domain
isotig00923	PF07679.10	9.1e-25	86	1.4	2.9e-18	65.2	0.1	2.7	2	0	0	2	2	2	2	Immunoglobulin I-set domain
isotig00923	PF07679.10	2.6e-22	78.2	0	1.5e-21	75.7	0	2.5	1	0	0	1	1	1	1	Immunoglobulin I-set domain
isotig00923	PF07686.11	0.00028	20.4	0.7	0.77	9.4	0	3.3	3	0	0	3	3	2	2	Immunoglobulin V-set domain
isotig00923	PF07686.11	3.9e-06	26.4	0	3e-05	23.6	0	2.6	1	0	0	1	1	1	1	Immunoglobulin V-set domain
isotig00923	PF00018.22	2.1e-10	39.5	0.9	5e-10	38.3	0.1	2	2	0	0	2	2	1	1	SH3 domain
isotig00923	PF07653.11	2.2e-06	26.7	0	4.9e-06	25.6	0	1.5	1	0	0	1	1	1	1	Variant SH3 domain
isotig00924	PF02480.10	5.3e-05	21.4	0	3.4	5.5	0	5.4	6	1	1	7	7	0	0	Alphaherpesvirus glycoprotein E
isotig00924	PF08204.5	2.9e-06	26.8	17.4	1.2	8.6	0.1	9.7	10	5	0	10	10	1	1	CD47 immunoglobulin-like domain
isotig00924	PF08205.6	3e-14	52.4	1.6	0.069	12.7	0	7.1	7	0	0	7	7	2	2	CD80-like C2-set immunoglobulin domain
isotig00924	PF07654.9	3e-10	39.6	6.9	0.16	11.7	0	6.6	7	0	0	7	7	2	2	Immunoglobulin C1-set domain
isotig00924	PF07654.9	3.3e-17	62	0	0.38	10.5	0	9.4	9	1	0	9	9	2	2	Immunoglobulin C1-set domain
isotig00924	PF00047.19	6.6e-11	41.9	0.1	9.2e-05	22.2	0	2.8	3	0	0	3	3	2	2	Immunoglobulin domain
isotig00924	PF00047.19	1.3e-28	98.6	1.7	4.5e-07	29.6	0	7.6	7	1	0	7	7	4	4	Immunoglobulin domain
isotig00924	PF00047.19	2.1e-39	133.1	1.6	0.00031	20.5	0	11.4	11	0	0	11	11	6	6	Immunoglobulin domain
isotig00924	PF07679.10	1.7e-40	136.5	0	1e-14	53.9	0	4.1	4	0	0	4	4	3	3	Immunoglobulin I-set domain
isotig00924	PF07679.10	2.7e-131	427.5	0	1.6e-24	85.3	0	7.5	7	0	0	7	7	7	7	Immunoglobulin I-set domain
isotig00924	PF07679.10	4e-146	475	0	1.8e-14	53.1	0	10.2	10	0	0	10	10	10	10	Immunoglobulin I-set domain
isotig00924	PF07686.11	3.1e-09	36.4	0.2	0.00016	21.2	0	3.8	3	2	0	3	3	2	2	Immunoglobulin V-set domain
isotig00924	PF07686.11	9.5e-20	70.3	10.8	9.5e-05	22	0	9.5	8	6	0	8	8	4	4	Immunoglobulin V-set domain
isotig00924	PF07686.11	2e-32	111.1	2.6	0.0093	15.5	0.1	12.1	9	5	0	10	10	6	6	Immunoglobulin V-set domain
isotig00924	PF11465.2	0.00013	21.5	0.3	3.5	7.3	0	5.8	7	0	0	7	7	0	0	Natural killer cell receptor 2B4
isotig00924	PF06832.6	1.6e-13	50.1	0	0.54	9.9	0	9.1	9	0	0	9	9	1	1	Penicillin-Binding Protein C-terminus Family
isotig00924	PF06582.6	2e-25	87.4	24.9	3.8e-09	35.6	2.5	4.3	4	1	0	4	4	3	3	Repeat of unknown function (DUF1136)
isotig00924	PF06582.6	6e-07	28.6	0.3	2.1e-06	26.9	0.2	2	1	0	0	1	1	1	1	Repeat of unknown function (DUF1136)
isotig00924	PF06582.6	1.8e-29	100.3	28.7	3e-06	26.4	0.3	8.3	8	0	0	8	8	5	5	Repeat of unknown function (DUF1136)
isotig00924	PF06582.6	0.00011	21.5	3.2	0.00018	20.7	2.2	1.4	1	0	0	1	1	1	1	Repeat of unknown function (DUF1136)
isotig00925	PF02480.10	5.1e-05	21.4	0	3.4	5.5	0	5.4	6	1	1	7	7	0	0	Alphaherpesvirus glycoprotein E
isotig00925	PF02368.12	0.00097	18.7	0	10	5.8	0	4.4	5	0	0	5	5	0	0	Bacterial Ig-like domain (group 2)
isotig00925	PF08204.5	2.5e-06	27	17.3	1.2	8.6	0.1	9.7	10	5	0	10	10	1	1	CD47 immunoglobulin-like domain
isotig00925	PF08205.6	3e-14	52.4	1.6	0.069	12.7	0	7.1	7	0	0	7	7	2	2	CD80-like C2-set immunoglobulin domain
isotig00925	PF07654.9	3e-10	39.6	6.9	0.16	11.7	0	6.6	7	0	0	7	7	2	2	Immunoglobulin C1-set domain
isotig00925	PF07654.9	3e-17	62.1	0	0.37	10.5	0	9.4	9	1	0	9	9	2	2	Immunoglobulin C1-set domain
isotig00925	PF00047.19	6.6e-11	41.9	0.1	9.2e-05	22.2	0	2.8	3	0	0	3	3	2	2	Immunoglobulin domain
isotig00925	PF00047.19	1.3e-28	98.6	1.7	4.5e-07	29.6	0	7.6	7	1	0	7	7	4	4	Immunoglobulin domain
isotig00925	PF00047.19	1.9e-39	133.3	1.6	0.00031	20.5	0	11.4	11	0	0	11	11	6	6	Immunoglobulin domain
isotig00925	PF07679.10	1.7e-40	136.5	0	1e-14	53.9	0	4.1	4	0	0	4	4	3	3	Immunoglobulin I-set domain
isotig00925	PF07679.10	2.7e-131	427.5	0	1.6e-24	85.3	0	7.5	7	0	0	7	7	7	7	Immunoglobulin I-set domain
isotig00925	PF07679.10	3e-146	475.4	0	1.8e-14	53.1	0	10.2	10	0	0	10	10	10	10	Immunoglobulin I-set domain
isotig00925	PF07686.11	3.1e-09	36.4	0.2	0.00016	21.2	0	3.8	3	2	0	3	3	2	2	Immunoglobulin V-set domain
isotig00925	PF07686.11	9.5e-20	70.3	10.8	9.5e-05	22	0	9.5	8	6	0	8	8	4	4	Immunoglobulin V-set domain
isotig00925	PF07686.11	1.8e-32	111.3	2.6	0.0092	15.6	0.1	12.1	9	5	0	10	10	6	6	Immunoglobulin V-set domain
isotig00925	PF11465.2	0.00012	21.6	0.3	3.4	7.3	0	5.8	7	0	0	7	7	0	0	Natural killer cell receptor 2B4
isotig00925	PF06832.6	1.4e-13	50.2	0	0.53	9.9	0	9.1	9	0	0	9	9	1	1	Penicillin-Binding Protein C-terminus Family
isotig00925	PF06582.6	2e-25	87.4	24.9	3.8e-09	35.6	2.5	4.3	4	1	0	4	4	3	3	Repeat of unknown function (DUF1136)
isotig00925	PF06582.6	0.00011	21.5	3.2	0.00018	20.7	2.2	1.4	1	0	0	1	1	1	1	Repeat of unknown function (DUF1136)
isotig00925	PF06582.6	6e-07	28.6	0.3	2.1e-06	26.9	0.2	2	1	0	0	1	1	1	1	Repeat of unknown function (DUF1136)
isotig00925	PF06582.6	1.7e-29	100.4	28.7	3e-06	26.4	0.3	8.3	8	0	0	8	8	5	5	Repeat of unknown function (DUF1136)
isotig00926	PF02480.10	1.6e-07	29.7	0.1	3.7	5.4	0	6.8	7	1	0	8	8	0	0	Alphaherpesvirus glycoprotein E
isotig00926	PF08204.5	1.2e-07	31.2	16.5	1.6	8.2	0	11	12	3	0	12	12	0	0	CD47 immunoglobulin-like domain
isotig00926	PF08205.6	3e-14	52.4	1.6	0.069	12.7	0	7.1	7	0	0	7	7	2	2	CD80-like C2-set immunoglobulin domain
isotig00926	PF07654.9	7.3e-20	70.5	0.1	0.53	10	0	11.6	12	1	0	12	12	2	2	Immunoglobulin C1-set domain
isotig00926	PF07654.9	3e-10	39.6	6.9	0.16	11.7	0	6.6	7	0	0	7	7	2	2	Immunoglobulin C1-set domain
isotig00926	PF00047.19	5.3e-50	167.1	5.5	0.00044	20	0	13.3	13	0	0	13	13	9	9	Immunoglobulin domain
isotig00926	PF00047.19	1.3e-28	98.6	1.7	4.5e-07	29.6	0	7.6	7	1	0	7	7	4	4	Immunoglobulin domain
isotig00926	PF07679.10	1.8e-191	620.3	0	2.5e-14	52.6	0	13.2	13	0	0	13	13	13	13	Immunoglobulin I-set domain
isotig00926	PF07679.10	2.7e-131	427.5	0	1.6e-24	85.3	0	7.5	7	0	0	7	7	7	7	Immunoglobulin I-set domain
isotig00926	PF07686.11	8.2e-42	141.4	5.4	0.0011	18.6	0	14.4	12	4	0	13	13	8	8	Immunoglobulin V-set domain
isotig00926	PF07686.11	9.5e-20	70.3	10.8	9.5e-05	22	0	9.5	8	6	0	8	8	4	4	Immunoglobulin V-set domain
isotig00926	PF11465.2	1.6e-06	27.7	2.6	4.8	6.8	0	8	10	0	0	10	10	0	0	Natural killer cell receptor 2B4
isotig00926	PF06832.6	3.6e-15	55.3	0	0.76	9.4	0	11.3	13	0	0	13	13	1	1	Penicillin-Binding Protein C-terminus Family
isotig00926	PF06582.6	1.5e-50	167.4	63.1	1.9e-08	33.4	2.5	11.6	12	0	0	12	12	8	8	Repeat of unknown function (DUF1136)
isotig00926	PF06582.6	0.00011	21.5	3.2	0.00018	20.7	2.2	1.4	1	0	0	1	1	1	1	Repeat of unknown function (DUF1136)
isotig00926	PF06582.6	6e-07	28.6	0.3	2.1e-06	26.9	0.2	2	1	0	0	1	1	1	1	Repeat of unknown function (DUF1136)
isotig00927	PF01553.15	2e-07	30.3	0	3.7e-07	29.4	0	1.4	1	0	0	1	1	1	1	Acyltransferase
isotig00927	PF00047.19	2.7e-08	33.5	0	1.2e-07	31.4	0	2.2	2	0	0	2	2	1	1	Immunoglobulin domain
isotig00927	PF07679.10	9.1e-25	86	1.4	2.9e-18	65.2	0.1	2.7	2	0	0	2	2	2	2	Immunoglobulin I-set domain
isotig00927	PF07679.10	2.6e-22	78.2	0	1.5e-21	75.7	0	2.5	1	0	0	1	1	1	1	Immunoglobulin I-set domain
isotig00927	PF07686.11	0.00028	20.4	0.7	0.77	9.4	0	3.3	3	0	0	3	3	2	2	Immunoglobulin V-set domain
isotig00927	PF07686.11	3.9e-06	26.4	0	3e-05	23.6	0	2.6	1	0	0	1	1	1	1	Immunoglobulin V-set domain
isotig00927	PF00018.22	2.1e-10	39.5	0.9	5e-10	38.3	0.1	2	2	0	0	2	2	1	1	SH3 domain
isotig00927	PF07653.11	2.2e-06	26.7	0	4.9e-06	25.6	0	1.5	1	0	0	1	1	1	1	Variant SH3 domain
isotig00928	PF02480.10	1.5e-07	29.7	0.1	3.7	5.4	0	6.8	7	1	0	8	8	0	0	Alphaherpesvirus glycoprotein E
isotig00928	PF08204.5	1.1e-07	31.4	16.5	1.6	8.2	0	11.1	12	3	0	12	12	0	0	CD47 immunoglobulin-like domain
isotig00928	PF08205.6	3e-14	52.4	1.6	0.069	12.7	0	7.1	7	0	0	7	7	2	2	CD80-like C2-set immunoglobulin domain
isotig00928	PF07654.9	3e-10	39.6	6.9	0.16	11.7	0	6.6	7	0	0	7	7	2	2	Immunoglobulin C1-set domain
isotig00928	PF07654.9	6.6e-20	70.6	0.1	0.53	10	0	11.6	12	1	0	12	12	2	2	Immunoglobulin C1-set domain
isotig00928	PF00047.19	1.3e-28	98.6	1.7	4.5e-07	29.6	0	7.6	7	1	0	7	7	4	4	Immunoglobulin domain
isotig00928	PF00047.19	4.8e-50	167.2	5.5	0.00043	20	0	13.3	13	0	0	13	13	9	9	Immunoglobulin domain
isotig00928	PF07679.10	2.7e-131	427.5	0	1.6e-24	85.3	0	7.5	7	0	0	7	7	7	7	Immunoglobulin I-set domain
isotig00928	PF07679.10	1.3e-191	620.8	0	2.5e-14	52.6	0	13.2	13	0	0	13	13	13	13	Immunoglobulin I-set domain
isotig00928	PF07686.11	9.5e-20	70.3	10.8	9.5e-05	22	0	9.5	8	6	0	8	8	4	4	Immunoglobulin V-set domain
isotig00928	PF07686.11	8.3e-42	141.4	5.6	0.0011	18.6	0	14.4	12	4	0	13	13	8	8	Immunoglobulin V-set domain
isotig00928	PF11465.2	2.6e-06	27	3.4	4.8	6.8	0	8	11	0	0	11	11	0	0	Natural killer cell receptor 2B4
isotig00928	PF06832.6	3.2e-15	55.5	0	0.75	9.4	0	11.3	13	0	0	13	13	1	1	Penicillin-Binding Protein C-terminus Family
isotig00928	PF06582.6	6e-07	28.6	0.3	2.1e-06	26.9	0.2	2	1	0	0	1	1	1	1	Repeat of unknown function (DUF1136)
isotig00928	PF06582.6	0.00011	21.5	3.2	0.00018	20.7	2.2	1.4	1	0	0	1	1	1	1	Repeat of unknown function (DUF1136)
isotig00928	PF06582.6	1.3e-50	167.5	63.1	1.9e-08	33.4	2.5	11.6	12	0	0	12	12	8	8	Repeat of unknown function (DUF1136)
isotig00929	PF02480.10	8.8e-05	20.6	0.1	2.8	5.8	0	4.6	3	2	1	5	5	0	0	Alphaherpesvirus glycoprotein E
isotig00929	PF08204.5	1.1e-11	44.3	7	1.9	8	0	10.8	12	3	0	12	12	0	0	CD47 immunoglobulin-like domain
isotig00929	PF08204.5	5.1e-05	22.7	7	0.55	9.7	0.2	5.3	4	3	0	4	4	1	1	CD47 immunoglobulin-like domain
isotig00929	PF08205.6	6e-14	51.4	2	0.2	11.3	0	11.3	13	0	0	13	13	1	1	CD80-like C2-set immunoglobulin domain
isotig00929	PF07654.9	6e-43	144.4	0.1	0.00018	21.2	0	13.1	13	0	0	13	13	6	6	Immunoglobulin C1-set domain
isotig00929	PF07654.9	3.1e-06	26.8	0	0.17	11.6	0	4.6	4	1	1	5	5	1	1	Immunoglobulin C1-set domain
isotig00929	PF00047.19	4.5e-56	186.5	10.1	2.3e-05	24.1	0	13.7	13	0	0	13	13	11	11	Immunoglobulin domain
isotig00929	PF00047.19	1.3e-21	76.1	1.1	0.00013	21.7	0	5.9	6	0	0	6	6	3	3	Immunoglobulin domain
isotig00929	PF00047.19	6.6e-11	41.9	0.1	9.2e-05	22.2	0	2.8	3	0	0	3	3	2	2	Immunoglobulin domain
isotig00929	PF07679.10	1.2e-219	710.6	0	3.4e-19	68.2	0	13.2	13	0	0	13	13	13	13	Immunoglobulin I-set domain
isotig00929	PF07679.10	1.9e-66	219.6	0	8.2e-15	54.1	0	5.4	5	0	0	5	5	5	5	Immunoglobulin I-set domain
isotig00929	PF07679.10	1.7e-40	136.5	0	1e-14	53.9	0	4.1	4	0	0	4	4	3	3	Immunoglobulin I-set domain
isotig00929	PF07686.11	1.7e-56	188.7	5.7	0.00019	21	0	16.3	13	6	0	13	13	10	10	Immunoglobulin V-set domain
isotig00929	PF07686.11	1.9e-20	72.6	1.6	0.0038	16.8	0.1	6.5	5	4	0	5	5	4	4	Immunoglobulin V-set domain
isotig00929	PF07686.11	3.1e-09	36.4	0.2	0.00016	21.2	0	3.8	3	2	0	3	3	2	2	Immunoglobulin V-set domain
isotig00929	PF11465.2	0.00015	21.3	0.1	1.5	8.4	0	4	4	0	0	4	4	0	0	Natural killer cell receptor 2B4
isotig00929	PF06832.6	2e-25	88.2	0.7	0.32	10.7	0	13.4	13	0	0	13	13	2	2	Penicillin-Binding Protein C-terminus Family
isotig00929	PF06832.6	4.3e-06	26.2	0	0.22	11.2	0	4.6	4	1	0	4	4	1	1	Penicillin-Binding Protein C-terminus Family
isotig00929	PF06582.6	2.2e-61	201.8	66	1.6e-11	43.2	0.1	9.6	9	0	0	9	9	9	9	Repeat of unknown function (DUF1136)
isotig00929	PF06582.6	8e-12	44.2	8.7	0.0006	19.1	0.5	3.9	3	0	0	3	3	3	3	Repeat of unknown function (DUF1136)
isotig00929	PF06582.6	2e-25	87.4	24.9	3.8e-09	35.6	2.5	4.3	4	1	0	4	4	3	3	Repeat of unknown function (DUF1136)
isotig00930	PF02480.10	8.1e-05	20.7	0.1	2.7	5.8	0	4.6	3	2	1	5	5	0	0	Alphaherpesvirus glycoprotein E
isotig00930	PF08204.5	4.4e-05	22.9	6.9	0.54	9.7	0.2	5.3	4	3	0	4	4	1	1	CD47 immunoglobulin-like domain
isotig00930	PF08204.5	1.1e-11	44.3	7	1.9	8	0	10.8	12	3	0	12	12	0	0	CD47 immunoglobulin-like domain
isotig00930	PF08205.6	6e-14	51.4	2	0.2	11.3	0	11.3	13	0	0	13	13	1	1	CD80-like C2-set immunoglobulin domain
isotig00930	PF07654.9	2.8e-06	26.9	0	0.17	11.6	0	4.6	4	1	1	5	5	1	1	Immunoglobulin C1-set domain
isotig00930	PF07654.9	6e-43	144.4	0.1	0.00018	21.2	0	13.1	13	0	0	13	13	6	6	Immunoglobulin C1-set domain
isotig00930	PF00047.19	6.6e-11	41.9	0.1	9.2e-05	22.2	0	2.8	3	0	0	3	3	2	2	Immunoglobulin domain
isotig00930	PF00047.19	1.2e-21	76.3	1.1	0.00013	21.7	0	5.9	6	0	0	6	6	3	3	Immunoglobulin domain
isotig00930	PF00047.19	4.5e-56	186.5	10.1	2.3e-05	24.1	0	13.7	13	0	0	13	13	11	11	Immunoglobulin domain
isotig00930	PF07679.10	1.7e-40	136.5	0	1e-14	53.9	0	4.1	4	0	0	4	4	3	3	Immunoglobulin I-set domain
isotig00930	PF07679.10	1.4e-66	220	0.1	8e-15	54.2	0	5.4	5	0	0	5	5	5	5	Immunoglobulin I-set domain
isotig00930	PF07679.10	1.2e-219	710.6	0	3.4e-19	68.2	0	13.2	13	0	0	13	13	13	13	Immunoglobulin I-set domain
isotig00930	PF07686.11	3.1e-09	36.4	0.2	0.00016	21.2	0	3.8	3	2	0	3	3	2	2	Immunoglobulin V-set domain
isotig00930	PF07686.11	1.8e-20	72.6	1.8	0.0037	16.8	0.1	6.5	5	4	0	5	5	4	4	Immunoglobulin V-set domain
isotig00930	PF07686.11	1.7e-56	188.7	5.7	0.00019	21	0	16.3	13	6	0	13	13	10	10	Immunoglobulin V-set domain
isotig00930	PF11465.2	0.00014	21.5	0.1	1.5	8.5	0	4.1	4	0	0	4	4	0	0	Natural killer cell receptor 2B4
isotig00930	PF06832.6	3.8e-06	26.4	0	0.21	11.2	0	4.6	4	1	0	4	4	1	1	Penicillin-Binding Protein C-terminus Family
isotig00930	PF06832.6	2e-25	88.2	0.7	0.32	10.7	0	13.4	13	0	0	13	13	2	2	Penicillin-Binding Protein C-terminus Family
isotig00930	PF06582.6	2e-25	87.4	24.9	3.8e-09	35.6	2.5	4.3	4	1	0	4	4	3	3	Repeat of unknown function (DUF1136)
isotig00930	PF06582.6	4.1e-11	41.9	11.1	0.00058	19.1	0.5	3.9	4	0	0	4	4	3	3	Repeat of unknown function (DUF1136)
isotig00930	PF06582.6	2.2e-61	201.8	66	1.6e-11	43.2	0.1	9.6	9	0	0	9	9	9	9	Repeat of unknown function (DUF1136)
isotig00931	PF02480.10	3.1e-07	28.7	0.2	2.1	6.2	0	6	6	1	0	7	7	0	0	Alphaherpesvirus glycoprotein E
isotig00931	PF08204.5	1.2e-05	24.8	10.2	1	8.8	0.1	6.9	6	3	0	6	6	1	1	CD47 immunoglobulin-like domain
isotig00931	PF08204.5	1.1e-11	44.3	7	1.9	8	0	10.8	12	3	0	12	12	0	0	CD47 immunoglobulin-like domain
isotig00931	PF08205.6	6e-14	51.4	2	0.2	11.3	0	11.3	13	0	0	13	13	1	1	CD80-like C2-set immunoglobulin domain
isotig00931	PF07654.9	1.1e-09	37.9	0	0.34	10.6	0	7	8	0	0	8	8	1	1	Immunoglobulin C1-set domain
isotig00931	PF07654.9	6e-43	144.4	0.1	0.00018	21.2	0	13.1	13	0	0	13	13	6	6	Immunoglobulin C1-set domain
isotig00931	PF00047.19	5.7e-34	115.7	1.4	0.00025	20.8	0	7.9	7	0	0	7	7	6	6	Immunoglobulin domain
isotig00931	PF00047.19	4.5e-56	186.5	10.1	2.3e-05	24.1	0	13.7	13	0	0	13	13	11	11	Immunoglobulin domain
isotig00931	PF07679.10	1.4e-112	367.5	0	1.7e-14	53.1	0	8.3	8	0	0	8	8	8	8	Immunoglobulin I-set domain
isotig00931	PF07679.10	1.2e-219	710.6	0	3.4e-19	68.2	0	13.2	13	0	0	13	13	13	13	Immunoglobulin I-set domain
isotig00931	PF07686.11	1.6e-30	105	4.5	0.00058	19.4	0	9	8	3	0	8	8	6	6	Immunoglobulin V-set domain
isotig00931	PF07686.11	1.7e-56	188.7	5.7	0.00019	21	0	16.3	13	6	0	13	13	10	10	Immunoglobulin V-set domain
isotig00931	PF11465.2	3.1e-07	30	1.2	2.8	7.6	0	6.6	7	0	0	7	7	0	0	Natural killer cell receptor 2B4
isotig00931	PF06832.6	2e-08	33.7	0	0.43	10.2	0	7.2	8	1	0	8	8	1	1	Penicillin-Binding Protein C-terminus Family
isotig00931	PF06832.6	2e-25	88.2	0.7	0.32	10.7	0	13.4	13	0	0	13	13	2	2	Penicillin-Binding Protein C-terminus Family
isotig00931	PF06582.6	5.4e-34	114.7	42.8	1.1e-08	34.1	2.5	7.3	7	0	0	7	7	6	6	Repeat of unknown function (DUF1136)
isotig00931	PF06582.6	2.2e-61	201.8	66	1.6e-11	43.2	0.1	9.6	9	0	0	9	9	9	9	Repeat of unknown function (DUF1136)
isotig00932	PF02480.10	3e-07	28.8	0.2	2.1	6.2	0	6	6	1	0	7	7	0	0	Alphaherpesvirus glycoprotein E
isotig00932	PF08204.5	1.1e-11	44.3	7	1.9	8	0	10.8	12	3	0	12	12	0	0	CD47 immunoglobulin-like domain
isotig00932	PF08204.5	1e-05	25	10.1	1	8.8	0.1	6.9	6	3	0	6	6	1	1	CD47 immunoglobulin-like domain
isotig00932	PF08205.6	6e-14	51.4	2	0.2	11.3	0	11.3	13	0	0	13	13	1	1	CD80-like C2-set immunoglobulin domain
isotig00932	PF07654.9	6e-43	144.4	0.1	0.00018	21.2	0	13.1	13	0	0	13	13	6	6	Immunoglobulin C1-set domain
isotig00932	PF07654.9	9.9e-10	38	0	0.33	10.7	0	7	8	0	0	8	8	1	1	Immunoglobulin C1-set domain
isotig00932	PF00047.19	4.5e-56	186.5	10.1	2.3e-05	24.1	0	13.7	13	0	0	13	13	11	11	Immunoglobulin domain
isotig00932	PF00047.19	5.1e-34	115.9	1.4	0.00025	20.8	0	7.9	7	0	0	7	7	6	6	Immunoglobulin domain
isotig00932	PF07679.10	1.2e-219	710.6	0	3.4e-19	68.2	0	13.2	13	0	0	13	13	13	13	Immunoglobulin I-set domain
isotig00932	PF07679.10	1.1e-112	367.9	0	1.7e-14	53.1	0	8.3	8	0	0	8	8	8	8	Immunoglobulin I-set domain
isotig00932	PF07686.11	1.7e-56	188.7	5.7	0.00019	21	0	16.3	13	6	0	13	13	10	10	Immunoglobulin V-set domain
isotig00932	PF07686.11	1.9e-30	104.8	4.8	0.00057	19.4	0	9	8	3	0	8	8	6	6	Immunoglobulin V-set domain
isotig00932	PF11465.2	2.8e-07	30.1	1.2	2.8	7.6	0	6.6	7	0	0	7	7	0	0	Natural killer cell receptor 2B4
isotig00932	PF06832.6	2e-25	88.2	0.7	0.32	10.7	0	13.4	13	0	0	13	13	2	2	Penicillin-Binding Protein C-terminus Family
isotig00932	PF06832.6	1.8e-08	33.9	0	0.43	10.2	0	7.2	8	1	0	8	8	1	1	Penicillin-Binding Protein C-terminus Family
isotig00932	PF06582.6	2.2e-61	201.8	66	1.6e-11	43.2	0.1	9.6	9	0	0	9	9	9	9	Repeat of unknown function (DUF1136)
isotig00932	PF06582.6	5e-34	114.8	42.8	1.1e-08	34.1	2.5	7.3	7	0	0	7	7	6	6	Repeat of unknown function (DUF1136)
isotig00933	PF00047.19	2.7e-08	33.5	0	1.2e-07	31.4	0	2.2	2	0	0	2	2	1	1	Immunoglobulin domain
isotig00933	PF07679.10	9.1e-25	86	1.4	2.9e-18	65.2	0.1	2.7	2	0	0	2	2	2	2	Immunoglobulin I-set domain
isotig00933	PF07679.10	2.6e-22	78.2	0	1.5e-21	75.7	0	2.5	1	0	0	1	1	1	1	Immunoglobulin I-set domain
isotig00933	PF07686.11	0.00028	20.4	0.7	0.77	9.4	0	3.3	3	0	0	3	3	2	2	Immunoglobulin V-set domain
isotig00933	PF07686.11	3.9e-06	26.4	0	3e-05	23.6	0	2.6	1	0	0	1	1	1	1	Immunoglobulin V-set domain
isotig00933	PF00018.22	2.1e-10	39.5	0.9	5e-10	38.3	0.1	2	2	0	0	2	2	1	1	SH3 domain
isotig00933	PF07653.11	2.2e-06	26.7	0	4.9e-06	25.6	0	1.5	1	0	0	1	1	1	1	Variant SH3 domain
isotig00934	PF08205.6	4.9e-06	26	0.4	0.059	13	0	4.1	3	0	0	3	3	2	2	CD80-like C2-set immunoglobulin domain
isotig00934	PF00047.19	2.8e-11	43.1	0.3	1.9e-05	24.4	0	3.6	3	0	0	3	3	2	2	Immunoglobulin domain
isotig00934	PF07679.10	6e-33	112.3	5.5	7.8e-17	60.6	0.2	4.4	4	0	0	4	4	2	2	Immunoglobulin I-set domain
isotig00934	PF07686.11	8.4e-05	22.1	10.7	0.00084	18.9	0	4.2	5	0	0	5	5	2	2	Immunoglobulin V-set domain
isotig00935	PF08205.6	1e-07	31.4	0.5	0.0011	18.5	0	2.7	2	0	0	2	2	2	2	CD80-like C2-set immunoglobulin domain
isotig00935	PF08205.6	9.1e-10	38	0	0.028	14	0	4.6	3	0	0	3	3	3	3	CD80-like C2-set immunoglobulin domain
isotig00935	PF00041.15	1e-63	211.1	14	6.5e-14	51.5	0.2	6	6	0	0	6	6	5	5	Fibronectin type III domain
isotig00935	PF00047.19	0.001	18.9	0	0.0021	17.8	0	1.6	1	0	0	1	1	1	1	Immunoglobulin domain
isotig00935	PF00047.19	4.3e-09	36	0.4	0.0027	17.5	0.2	3.8	3	2	0	3	3	1	1	Immunoglobulin domain
isotig00935	PF00047.19	3.8e-10	39.4	13.5	5.6e-06	26.1	0	5.3	5	0	0	5	5	2	2	Immunoglobulin domain
isotig00935	PF00047.19	8.4e-05	22.3	0.5	0.39	10.6	0	3.5	4	0	0	4	4	1	1	Immunoglobulin domain
isotig00935	PF00047.19	1.5e-22	79.2	0.2	7.2e-08	32.1	0	4.5	4	0	0	4	4	3	3	Immunoglobulin domain
isotig00935	PF07679.10	2.7e-09	36.5	0.1	4.3e-09	35.8	0	1.3	1	0	0	1	1	1	1	Immunoglobulin I-set domain
isotig00935	PF07679.10	8e-14	51	0.1	2.4e-13	49.4	0	1.6	2	0	0	2	2	1	1	Immunoglobulin I-set domain
isotig00935	PF07679.10	1.6e-27	94.9	3.3	2.1e-10	40	0.4	3	3	0	0	3	3	3	3	Immunoglobulin I-set domain
isotig00935	PF07679.10	3.2e-52	174	6	1.6e-17	62.8	0	5.5	6	0	0	6	6	3	3	Immunoglobulin I-set domain
isotig00935	PF07679.10	2.7e-28	97.4	4.4	7e-19	67.2	0.1	3.1	3	0	0	3	3	3	3	Immunoglobulin I-set domain
isotig00935	PF07679.10	1.9e-57	190.8	5.9	8.8e-22	76.5	0	4.6	6	0	0	6	6	3	3	Immunoglobulin I-set domain
isotig00935	PF07686.11	5.3e-06	26	0.1	1.9e-05	24.2	0.1	1.8	1	1	0	1	1	1	1	Immunoglobulin V-set domain
isotig00935	PF07686.11	1.9e-10	40.3	1.1	1.2e-05	24.9	0.5	4	3	2	0	3	3	1	1	Immunoglobulin V-set domain
isotig00935	PF07686.11	6.3e-11	41.9	2.9	0.0054	16.3	0	4.7	4	1	0	4	4	3	3	Immunoglobulin V-set domain
isotig00935	PF07686.11	2.5e-05	23.8	0.1	0.11	12.1	0	2.7	1	1	0	2	2	2	2	Immunoglobulin V-set domain
isotig00935	PF07686.11	2.1e-16	59.5	0.7	1.7e-05	24.4	0	4.6	5	0	0	5	5	3	3	Immunoglobulin V-set domain
isotig00935	PF11465.2	8e-06	25.4	1.9	1.5	8.5	0	4.5	4	0	0	4	4	1	1	Natural killer cell receptor 2B4
isotig00935	PF00018.22	1.6e-10	39.9	0.1	3.1e-10	39	0.1	1.5	1	0	0	1	1	1	1	SH3 domain
isotig00935	PF07653.11	1.4e-06	27.3	0	3e-06	26.3	0	1.5	1	0	0	1	1	1	1	Variant SH3 domain
isotig00936	PF00047.19	2.7e-08	33.5	0	1.2e-07	31.4	0	2.2	2	0	0	2	2	1	1	Immunoglobulin domain
isotig00936	PF07679.10	9.1e-25	86	1.4	2.9e-18	65.2	0.1	2.7	2	0	0	2	2	2	2	Immunoglobulin I-set domain
isotig00936	PF07679.10	2.6e-22	78.2	0	1.5e-21	75.7	0	2.5	1	0	0	1	1	1	1	Immunoglobulin I-set domain
isotig00936	PF07686.11	0.00028	20.4	0.7	0.77	9.4	0	3.3	3	0	0	3	3	2	2	Immunoglobulin V-set domain
isotig00936	PF07686.11	3.9e-06	26.4	0	3e-05	23.6	0	2.6	1	0	0	1	1	1	1	Immunoglobulin V-set domain
isotig00936	PF00018.22	2.1e-10	39.5	0.9	5e-10	38.3	0.1	2	2	0	0	2	2	1	1	SH3 domain
isotig00936	PF07653.11	2.2e-06	26.7	0	4.9e-06	25.6	0	1.5	1	0	0	1	1	1	1	Variant SH3 domain
isotig00937	PF08205.6	9.1e-10	38	0	0.028	14	0	4.6	3	0	0	3	3	3	3	CD80-like C2-set immunoglobulin domain
isotig00937	PF00047.19	1.5e-22	79.2	0.2	7.2e-08	32.1	0	4.5	4	0	0	4	4	3	3	Immunoglobulin domain
isotig00937	PF07679.10	9.1e-25	86	1.4	2.9e-18	65.2	0.1	2.7	2	0	0	2	2	2	2	Immunoglobulin I-set domain
isotig00937	PF07679.10	1.9e-57	190.8	5.9	8.8e-22	76.5	0	4.6	6	0	0	6	6	3	3	Immunoglobulin I-set domain
isotig00937	PF07686.11	0.00028	20.4	0.7	0.77	9.4	0	3.3	3	0	0	3	3	2	2	Immunoglobulin V-set domain
isotig00937	PF07686.11	2.1e-16	59.5	0.7	1.7e-05	24.4	0	4.6	5	0	0	5	5	3	3	Immunoglobulin V-set domain
isotig00937	PF00018.22	1.6e-10	39.9	0.1	3.1e-10	39	0.1	1.5	1	0	0	1	1	1	1	SH3 domain
isotig00937	PF07653.11	1.4e-06	27.3	0	3e-06	26.3	0	1.5	1	0	0	1	1	1	1	Variant SH3 domain
isotig00938	PF08205.6	9.1e-10	38	0	0.028	14	0	4.6	3	0	0	3	3	3	3	CD80-like C2-set immunoglobulin domain
isotig00938	PF00047.19	1.5e-22	79.2	0.2	7.2e-08	32.1	0	4.5	4	0	0	4	4	3	3	Immunoglobulin domain
isotig00938	PF07679.10	9.1e-25	86	1.4	2.9e-18	65.2	0.1	2.7	2	0	0	2	2	2	2	Immunoglobulin I-set domain
isotig00938	PF07679.10	1.9e-57	190.8	5.9	8.8e-22	76.5	0	4.6	6	0	0	6	6	3	3	Immunoglobulin I-set domain
isotig00938	PF07686.11	0.00028	20.4	0.7	0.77	9.4	0	3.3	3	0	0	3	3	2	2	Immunoglobulin V-set domain
isotig00938	PF07686.11	2.1e-16	59.5	0.7	1.7e-05	24.4	0	4.6	5	0	0	5	5	3	3	Immunoglobulin V-set domain
isotig00938	PF00018.22	1.6e-10	39.9	0.1	3.1e-10	39	0.1	1.5	1	0	0	1	1	1	1	SH3 domain
isotig00938	PF07653.11	1.4e-06	27.3	0	3e-06	26.3	0	1.5	1	0	0	1	1	1	1	Variant SH3 domain
isotig00939	PF02480.10	8.8e-05	20.6	0.1	2.8	5.8	0	4.6	3	2	1	5	5	0	0	Alphaherpesvirus glycoprotein E
isotig00939	PF08204.5	5.1e-05	22.7	7	0.55	9.7	0.2	5.3	4	3	0	4	4	1	1	CD47 immunoglobulin-like domain
isotig00939	PF07654.9	3.1e-06	26.8	0	0.17	11.6	0	4.6	4	1	1	5	5	1	1	Immunoglobulin C1-set domain
isotig00939	PF00047.19	6.6e-11	41.9	0.1	9.2e-05	22.2	0	2.8	3	0	0	3	3	2	2	Immunoglobulin domain
isotig00939	PF00047.19	1.3e-21	76.1	1.1	0.00013	21.7	0	5.9	6	0	0	6	6	3	3	Immunoglobulin domain
isotig00939	PF07679.10	1.7e-40	136.5	0	1e-14	53.9	0	4.1	4	0	0	4	4	3	3	Immunoglobulin I-set domain
isotig00939	PF07679.10	1.9e-66	219.6	0	8.2e-15	54.1	0	5.4	5	0	0	5	5	5	5	Immunoglobulin I-set domain
isotig00939	PF07686.11	3.1e-09	36.4	0.2	0.00016	21.2	0	3.8	3	2	0	3	3	2	2	Immunoglobulin V-set domain
isotig00939	PF07686.11	1.9e-20	72.6	1.6	0.0038	16.8	0.1	6.5	5	4	0	5	5	4	4	Immunoglobulin V-set domain
isotig00939	PF11465.2	0.00015	21.3	0.1	1.5	8.4	0	4	4	0	0	4	4	0	0	Natural killer cell receptor 2B4
isotig00939	PF06832.6	4.3e-06	26.2	0	0.22	11.2	0	4.6	4	1	0	4	4	1	1	Penicillin-Binding Protein C-terminus Family
isotig00939	PF06582.6	2e-25	87.4	24.9	3.8e-09	35.6	2.5	4.3	4	1	0	4	4	3	3	Repeat of unknown function (DUF1136)
isotig00939	PF06582.6	0.00011	21.5	3.2	0.00018	20.7	2.2	1.4	1	0	0	1	1	1	1	Repeat of unknown function (DUF1136)
isotig00939	PF06582.6	8e-12	44.2	8.7	0.0006	19.1	0.5	3.9	3	0	0	3	3	3	3	Repeat of unknown function (DUF1136)
isotig00940	PF02480.10	8.1e-05	20.7	0.1	2.7	5.8	0	4.6	3	2	1	5	5	0	0	Alphaherpesvirus glycoprotein E
isotig00940	PF08204.5	4.4e-05	22.9	6.9	0.54	9.7	0.2	5.3	4	3	0	4	4	1	1	CD47 immunoglobulin-like domain
isotig00940	PF07654.9	2.8e-06	26.9	0	0.17	11.6	0	4.6	4	1	1	5	5	1	1	Immunoglobulin C1-set domain
isotig00940	PF00047.19	6.6e-11	41.9	0.1	9.2e-05	22.2	0	2.8	3	0	0	3	3	2	2	Immunoglobulin domain
isotig00940	PF00047.19	1.2e-21	76.3	1.1	0.00013	21.7	0	5.9	6	0	0	6	6	3	3	Immunoglobulin domain
isotig00940	PF07679.10	1.7e-40	136.5	0	1e-14	53.9	0	4.1	4	0	0	4	4	3	3	Immunoglobulin I-set domain
isotig00940	PF07679.10	1.4e-66	220	0.1	8e-15	54.2	0	5.4	5	0	0	5	5	5	5	Immunoglobulin I-set domain
isotig00940	PF07686.11	3.1e-09	36.4	0.2	0.00016	21.2	0	3.8	3	2	0	3	3	2	2	Immunoglobulin V-set domain
isotig00940	PF07686.11	1.8e-20	72.6	1.8	0.0037	16.8	0.1	6.5	5	4	0	5	5	4	4	Immunoglobulin V-set domain
isotig00940	PF11465.2	0.00014	21.5	0.1	1.5	8.5	0	4.1	4	0	0	4	4	0	0	Natural killer cell receptor 2B4
isotig00940	PF06832.6	3.8e-06	26.4	0	0.21	11.2	0	4.6	4	1	0	4	4	1	1	Penicillin-Binding Protein C-terminus Family
isotig00940	PF06582.6	2e-25	87.4	24.9	3.8e-09	35.6	2.5	4.3	4	1	0	4	4	3	3	Repeat of unknown function (DUF1136)
isotig00940	PF06582.6	0.00011	21.5	3.2	0.00018	20.7	2.2	1.4	1	0	0	1	1	1	1	Repeat of unknown function (DUF1136)
isotig00940	PF06582.6	4.1e-11	41.9	11.1	0.00058	19.1	0.5	3.9	4	0	0	4	4	3	3	Repeat of unknown function (DUF1136)
isotig00941	PF02480.10	3.1e-07	28.7	0.2	2.1	6.2	0	6	6	1	0	7	7	0	0	Alphaherpesvirus glycoprotein E
isotig00941	PF08204.5	1.2e-05	24.8	10.2	1	8.8	0.1	6.9	6	3	0	6	6	1	1	CD47 immunoglobulin-like domain
isotig00941	PF07654.9	1.1e-09	37.9	0	0.34	10.6	0	7	8	0	0	8	8	1	1	Immunoglobulin C1-set domain
isotig00941	PF00047.19	5.7e-34	115.7	1.4	0.00025	20.8	0	7.9	7	0	0	7	7	6	6	Immunoglobulin domain
isotig00941	PF07679.10	1.4e-112	367.5	0	1.7e-14	53.1	0	8.3	8	0	0	8	8	8	8	Immunoglobulin I-set domain
isotig00941	PF07686.11	1.6e-30	105	4.5	0.00058	19.4	0	9	8	3	0	8	8	6	6	Immunoglobulin V-set domain
isotig00941	PF11465.2	3.1e-07	30	1.2	2.8	7.6	0	6.6	7	0	0	7	7	0	0	Natural killer cell receptor 2B4
isotig00941	PF06832.6	2e-08	33.7	0	0.43	10.2	0	7.2	8	1	0	8	8	1	1	Penicillin-Binding Protein C-terminus Family
isotig00941	PF06582.6	0.00011	21.5	3.2	0.00018	20.7	2.2	1.4	1	0	0	1	1	1	1	Repeat of unknown function (DUF1136)
isotig00941	PF06582.6	5.4e-34	114.7	42.8	1.1e-08	34.1	2.5	7.3	7	0	0	7	7	6	6	Repeat of unknown function (DUF1136)
isotig00942	PF02480.10	3e-07	28.8	0.2	2.1	6.2	0	6	6	1	0	7	7	0	0	Alphaherpesvirus glycoprotein E
isotig00942	PF08204.5	1e-05	25	10.1	1	8.8	0.1	6.9	6	3	0	6	6	1	1	CD47 immunoglobulin-like domain
isotig00942	PF07654.9	9.9e-10	38	0	0.33	10.7	0	7	8	0	0	8	8	1	1	Immunoglobulin C1-set domain
isotig00942	PF00047.19	5.1e-34	115.9	1.4	0.00025	20.8	0	7.9	7	0	0	7	7	6	6	Immunoglobulin domain
isotig00942	PF07679.10	1.1e-112	367.9	0	1.7e-14	53.1	0	8.3	8	0	0	8	8	8	8	Immunoglobulin I-set domain
isotig00942	PF07686.11	1.9e-30	104.8	4.8	0.00057	19.4	0	9	8	3	0	8	8	6	6	Immunoglobulin V-set domain
isotig00942	PF11465.2	2.8e-07	30.1	1.2	2.8	7.6	0	6.6	7	0	0	7	7	0	0	Natural killer cell receptor 2B4
isotig00942	PF06832.6	1.8e-08	33.9	0	0.43	10.2	0	7.2	8	1	0	8	8	1	1	Penicillin-Binding Protein C-terminus Family
isotig00942	PF06582.6	5e-34	114.8	42.8	1.1e-08	34.1	2.5	7.3	7	0	0	7	7	6	6	Repeat of unknown function (DUF1136)
isotig00942	PF06582.6	0.00011	21.5	3.2	0.00018	20.7	2.2	1.4	1	0	0	1	1	1	1	Repeat of unknown function (DUF1136)
isotig00943	PF01553.15	2e-07	30.3	0	3.7e-07	29.4	0	1.4	1	0	0	1	1	1	1	Acyltransferase
isotig00944	PF01553.15	2e-07	30.3	0	3.7e-07	29.4	0	1.4	1	0	0	1	1	1	1	Acyltransferase
isotig00945	PF00501.22	1.4e-46	158.4	0	1.9e-46	158	0	1.1	1	0	0	1	1	1	1	AMP-binding enzyme
isotig00945	PF00501.22	1.4e-26	92.6	0.1	1.7e-26	92.3	0.1	1.1	1	0	0	1	1	1	1	AMP-binding enzyme
isotig00945	PF08672.5	0.00025	20.9	0	0.0054	16.7	0	2.2	2	0	0	2	2	1	1	Anaphase promoting complex (APC) subunit 2
isotig00946	PF00501.22	1.4e-26	92.6	0.1	1.7e-26	92.3	0.1	1.1	1	0	0	1	1	1	1	AMP-binding enzyme
isotig00946	PF00501.22	1.4e-46	158.4	0	1.9e-46	158	0	1.1	1	0	0	1	1	1	1	AMP-binding enzyme
isotig00946	PF08672.5	0.00025	20.9	0	0.0054	16.7	0	2.2	2	0	0	2	2	1	1	Anaphase promoting complex (APC) subunit 2
isotig00947	PF00501.22	1.4e-46	158.4	0	1.9e-46	158	0	1.1	1	0	0	1	1	1	1	AMP-binding enzyme
isotig00947	PF00501.22	1.4e-26	92.6	0.1	1.7e-26	92.3	0.1	1.1	1	0	0	1	1	1	1	AMP-binding enzyme
isotig00947	PF08672.5	0.00025	20.9	0	0.0054	16.7	0	2.2	2	0	0	2	2	1	1	Anaphase promoting complex (APC) subunit 2
isotig00948	PF00501.22	1.4e-26	92.6	0.1	1.7e-26	92.3	0.1	1.1	1	0	0	1	1	1	1	AMP-binding enzyme
isotig00948	PF00501.22	1.4e-46	158.4	0	1.9e-46	158	0	1.1	1	0	0	1	1	1	1	AMP-binding enzyme
isotig00948	PF08672.5	0.00025	20.9	0	0.0054	16.7	0	2.2	2	0	0	2	2	1	1	Anaphase promoting complex (APC) subunit 2
isotig00949	PF00501.22	1.4e-26	92.6	0.1	1.7e-26	92.3	0.1	1.1	1	0	0	1	1	1	1	AMP-binding enzyme
isotig00949	PF00501.22	1.4e-46	158.4	0	1.9e-46	158	0	1.1	1	0	0	1	1	1	1	AMP-binding enzyme
isotig00949	PF08672.5	0.00025	20.9	0	0.0054	16.7	0	2.2	2	0	0	2	2	1	1	Anaphase promoting complex (APC) subunit 2
isotig00950	PF00501.22	1.4e-46	158.4	0	1.9e-46	158	0	1.1	1	0	0	1	1	1	1	AMP-binding enzyme
isotig00950	PF00501.22	1.4e-26	92.6	0.1	1.7e-26	92.3	0.1	1.1	1	0	0	1	1	1	1	AMP-binding enzyme
isotig00950	PF08672.5	0.00025	20.9	0	0.0054	16.7	0	2.2	2	0	0	2	2	1	1	Anaphase promoting complex (APC) subunit 2
isotig00951	PF00501.22	1.4e-26	92.6	0.1	1.7e-26	92.3	0.1	1.1	1	0	0	1	1	1	1	AMP-binding enzyme
isotig00951	PF00501.22	1.4e-46	158.4	0	1.9e-46	158	0	1.1	1	0	0	1	1	1	1	AMP-binding enzyme
isotig00951	PF08672.5	0.00025	20.9	0	0.0054	16.7	0	2.2	2	0	0	2	2	1	1	Anaphase promoting complex (APC) subunit 2
isotig00952	PF00501.22	1.4e-26	92.6	0.1	1.7e-26	92.3	0.1	1.1	1	0	0	1	1	1	1	AMP-binding enzyme
isotig00952	PF00501.22	1.4e-46	158.4	0	1.9e-46	158	0	1.1	1	0	0	1	1	1	1	AMP-binding enzyme
isotig00952	PF08672.5	0.00025	20.9	0	0.0054	16.7	0	2.2	2	0	0	2	2	1	1	Anaphase promoting complex (APC) subunit 2
isotig00953	PF00501.22	1.4e-46	158.4	0	1.9e-46	158	0	1.1	1	0	0	1	1	1	1	AMP-binding enzyme
isotig00953	PF00501.22	1.4e-26	92.6	0.1	1.7e-26	92.3	0.1	1.1	1	0	0	1	1	1	1	AMP-binding enzyme
isotig00953	PF08672.5	0.00025	20.9	0	0.0054	16.7	0	2.2	2	0	0	2	2	1	1	Anaphase promoting complex (APC) subunit 2
isotig00954	PF00501.22	1.4e-46	158.4	0	1.9e-46	158	0	1.1	1	0	0	1	1	1	1	AMP-binding enzyme
isotig00954	PF00501.22	1.4e-26	92.6	0.1	1.7e-26	92.3	0.1	1.1	1	0	0	1	1	1	1	AMP-binding enzyme
isotig00954	PF08672.5	0.00025	20.9	0	0.0054	16.7	0	2.2	2	0	0	2	2	1	1	Anaphase promoting complex (APC) subunit 2
isotig00955	PF00501.22	1.4e-46	158.4	0	1.9e-46	158	0	1.1	1	0	0	1	1	1	1	AMP-binding enzyme
isotig00955	PF00501.22	1.4e-26	92.6	0.1	1.7e-26	92.3	0.1	1.1	1	0	0	1	1	1	1	AMP-binding enzyme
isotig00955	PF08672.5	0.00025	20.9	0	0.0054	16.7	0	2.2	2	0	0	2	2	1	1	Anaphase promoting complex (APC) subunit 2
isotig00956	PF00501.22	1.4e-26	92.6	0.1	1.7e-26	92.3	0.1	1.1	1	0	0	1	1	1	1	AMP-binding enzyme
isotig00956	PF00501.22	1.4e-46	158.4	0	1.9e-46	158	0	1.1	1	0	0	1	1	1	1	AMP-binding enzyme
isotig00956	PF08672.5	0.00025	20.9	0	0.0054	16.7	0	2.2	2	0	0	2	2	1	1	Anaphase promoting complex (APC) subunit 2
isotig00957	PF00501.22	1.4e-26	92.6	0.1	1.7e-26	92.3	0.1	1.1	1	0	0	1	1	1	1	AMP-binding enzyme
isotig00957	PF00501.22	1.4e-46	158.4	0	1.9e-46	158	0	1.1	1	0	0	1	1	1	1	AMP-binding enzyme
isotig00957	PF08672.5	0.00025	20.9	0	0.0054	16.7	0	2.2	2	0	0	2	2	1	1	Anaphase promoting complex (APC) subunit 2
isotig00958	PF00501.22	1.4e-26	92.6	0.1	1.7e-26	92.3	0.1	1.1	1	0	0	1	1	1	1	AMP-binding enzyme
isotig00958	PF00501.22	1.4e-46	158.4	0	1.9e-46	158	0	1.1	1	0	0	1	1	1	1	AMP-binding enzyme
isotig00958	PF08672.5	0.00025	20.9	0	0.0054	16.7	0	2.2	2	0	0	2	2	1	1	Anaphase promoting complex (APC) subunit 2
isotig00959	PF00501.22	1.4e-46	158.4	0	1.9e-46	158	0	1.1	1	0	0	1	1	1	1	AMP-binding enzyme
isotig00959	PF00501.22	1.4e-26	92.6	0.1	1.7e-26	92.3	0.1	1.1	1	0	0	1	1	1	1	AMP-binding enzyme
isotig00959	PF08672.5	0.00025	20.9	0	0.0054	16.7	0	2.2	2	0	0	2	2	1	1	Anaphase promoting complex (APC) subunit 2
isotig00960	PF00501.22	1.4e-46	158.4	0	1.9e-46	158	0	1.1	1	0	0	1	1	1	1	AMP-binding enzyme
isotig00960	PF00501.22	1.4e-26	92.6	0.1	1.7e-26	92.3	0.1	1.1	1	0	0	1	1	1	1	AMP-binding enzyme
isotig00960	PF08672.5	0.00025	20.9	0	0.0054	16.7	0	2.2	2	0	0	2	2	1	1	Anaphase promoting complex (APC) subunit 2
isotig00961	PF00501.22	1.4e-26	92.6	0.1	1.7e-26	92.3	0.1	1.1	1	0	0	1	1	1	1	AMP-binding enzyme
isotig00961	PF00501.22	1.4e-46	158.4	0	1.9e-46	158	0	1.1	1	0	0	1	1	1	1	AMP-binding enzyme
isotig00961	PF08672.5	0.00025	20.9	0	0.0054	16.7	0	2.2	2	0	0	2	2	1	1	Anaphase promoting complex (APC) subunit 2
isotig00962	PF00501.22	1.4e-26	92.6	0.1	1.7e-26	92.3	0.1	1.1	1	0	0	1	1	1	1	AMP-binding enzyme
isotig00962	PF00501.22	1.4e-46	158.4	0	1.9e-46	158	0	1.1	1	0	0	1	1	1	1	AMP-binding enzyme
isotig00962	PF08672.5	0.00025	20.9	0	0.0054	16.7	0	2.2	2	0	0	2	2	1	1	Anaphase promoting complex (APC) subunit 2
isotig00963	PF00501.22	1.4e-26	92.6	0.1	1.7e-26	92.3	0.1	1.1	1	0	0	1	1	1	1	AMP-binding enzyme
isotig00963	PF00501.22	1.4e-46	158.4	0	1.9e-46	158	0	1.1	1	0	0	1	1	1	1	AMP-binding enzyme
isotig00963	PF08672.5	0.00025	20.9	0	0.0054	16.7	0	2.2	2	0	0	2	2	1	1	Anaphase promoting complex (APC) subunit 2
isotig00964	PF00501.22	1.4e-26	92.6	0.1	1.7e-26	92.3	0.1	1.1	1	0	0	1	1	1	1	AMP-binding enzyme
isotig00964	PF00501.22	1.4e-46	158.4	0	1.9e-46	158	0	1.1	1	0	0	1	1	1	1	AMP-binding enzyme
isotig00964	PF08672.5	0.00025	20.9	0	0.0054	16.7	0	2.2	2	0	0	2	2	1	1	Anaphase promoting complex (APC) subunit 2
isotig00965	PF00501.22	1.4e-26	92.6	0.1	1.7e-26	92.3	0.1	1.1	1	0	0	1	1	1	1	AMP-binding enzyme
isotig00965	PF00501.22	1.4e-46	158.4	0	1.9e-46	158	0	1.1	1	0	0	1	1	1	1	AMP-binding enzyme
isotig00965	PF08672.5	0.00025	20.9	0	0.0054	16.7	0	2.2	2	0	0	2	2	1	1	Anaphase promoting complex (APC) subunit 2
isotig00966	PF00501.22	1.4e-26	92.6	0.1	1.7e-26	92.3	0.1	1.1	1	0	0	1	1	1	1	AMP-binding enzyme
isotig00966	PF00501.22	1.4e-46	158.4	0	1.9e-46	158	0	1.1	1	0	0	1	1	1	1	AMP-binding enzyme
isotig00966	PF08672.5	0.00025	20.9	0	0.0054	16.7	0	2.2	2	0	0	2	2	1	1	Anaphase promoting complex (APC) subunit 2
isotig00967	PF00501.22	1.4e-46	158.4	0	1.9e-46	158	0	1.1	1	0	0	1	1	1	1	AMP-binding enzyme
isotig00967	PF00501.22	1.4e-26	92.6	0.1	1.7e-26	92.3	0.1	1.1	1	0	0	1	1	1	1	AMP-binding enzyme
isotig00967	PF08672.5	0.00025	20.9	0	0.0054	16.7	0	2.2	2	0	0	2	2	1	1	Anaphase promoting complex (APC) subunit 2
isotig00968	PF00501.22	1.4e-46	158.4	0	1.9e-46	158	0	1.1	1	0	0	1	1	1	1	AMP-binding enzyme
isotig00968	PF00501.22	1.4e-26	92.6	0.1	1.7e-26	92.3	0.1	1.1	1	0	0	1	1	1	1	AMP-binding enzyme
isotig00968	PF08672.5	0.00025	20.9	0	0.0054	16.7	0	2.2	2	0	0	2	2	1	1	Anaphase promoting complex (APC) subunit 2
isotig00973	PF00415.12	2.6e-09	36.8	4.8	0.0011	18.8	0.9	4.7	5	1	0	5	5	2	2	Regulator of chromosome condensation (RCC1) repeat
isotig00974	PF00665.20	7.4e-14	51.6	0	1.2e-13	50.9	0	1.3	1	0	0	1	1	1	1	Integrase core domain
isotig00974	PF00415.12	2.6e-09	36.8	4.8	0.0011	18.8	0.9	4.7	5	1	0	5	5	2	2	Regulator of chromosome condensation (RCC1) repeat
isotig00975	PF00665.20	7.4e-14	51.6	0	1.2e-13	50.9	0	1.3	1	0	0	1	1	1	1	Integrase core domain
isotig00975	PF00415.12	2.6e-09	36.8	4.8	0.0011	18.8	0.9	4.7	5	1	0	5	5	2	2	Regulator of chromosome condensation (RCC1) repeat
isotig00977	PF00665.20	7.4e-14	51.6	0	1.2e-13	50.9	0	1.3	1	0	0	1	1	1	1	Integrase core domain
isotig00978	PF00665.20	7.4e-14	51.6	0	1.2e-13	50.9	0	1.3	1	0	0	1	1	1	1	Integrase core domain
isotig00980	PF00415.12	2.6e-09	36.8	4.8	0.0011	18.8	0.9	4.7	5	1	0	5	5	2	2	Regulator of chromosome condensation (RCC1) repeat
isotig00981	PF00665.20	7.4e-14	51.6	0	1.2e-13	50.9	0	1.3	1	0	0	1	1	1	1	Integrase core domain
isotig00982	PF00665.20	7.4e-14	51.6	0	1.2e-13	50.9	0	1.3	1	0	0	1	1	1	1	Integrase core domain
isotig00983	PF00651.25	5.4e-11	42.2	0.8	2.8e-09	36.7	0.6	2.3	1	1	0	1	1	1	1	BTB/POZ domain
isotig00983	PF00415.12	2e-06	27.6	11.4	0.014	15.3	1.9	4.2	4	1	0	4	4	2	2	Regulator of chromosome condensation (RCC1) repeat
isotig00985	PF00651.25	5.4e-11	42.2	0.8	2.8e-09	36.7	0.6	2.3	1	1	0	1	1	1	1	BTB/POZ domain
isotig00985	PF00415.12	2e-06	27.6	11.4	0.014	15.3	1.9	4.2	4	1	0	4	4	2	2	Regulator of chromosome condensation (RCC1) repeat
isotig00987	PF00651.25	1.1e-09	38	0.4	4.1e-08	32.9	0.3	2.4	1	1	0	1	1	1	1	BTB/POZ domain
isotig00987	PF00415.12	1.6e-08	34.3	5.2	0.0014	18.5	0.1	4.2	4	0	0	4	4	2	2	Regulator of chromosome condensation (RCC1) repeat
isotig00988	PF00651.25	7.4e-12	44.9	0.8	7.1e-10	38.6	0.5	2.2	1	1	0	1	1	1	1	BTB/POZ domain
isotig00989	PF00665.20	7.4e-14	51.6	0	1.2e-13	50.9	0	1.3	1	0	0	1	1	1	1	Integrase core domain
isotig00990	PF00665.20	7.4e-14	51.6	0	1.2e-13	50.9	0	1.3	1	0	0	1	1	1	1	Integrase core domain
isotig00991	PF00651.25	7.4e-12	44.9	0.8	7.1e-10	38.6	0.5	2.2	1	1	0	1	1	1	1	BTB/POZ domain
isotig00993	PF00651.25	5e-11	42.3	0.4	5.9e-09	35.6	0	2.4	1	1	1	2	2	1	1	BTB/POZ domain
isotig00994	PF00665.20	1.6e-19	69.8	0	2.4e-19	69.3	0	1.3	1	0	0	1	1	1	1	Integrase core domain
isotig00995	PF00665.20	1.6e-19	69.8	0	2.4e-19	69.3	0	1.3	1	0	0	1	1	1	1	Integrase core domain
isotig00999	PF00335.14	2.9e-43	147.4	11.2	3.4e-43	147.2	7.8	1	1	0	0	1	1	1	1	Tetraspanin family
isotig01000	PF00335.14	2.9e-43	147.4	11.2	3.4e-43	147.2	7.8	1	1	0	0	1	1	1	1	Tetraspanin family
isotig01001	PF00335.14	2.9e-43	147.4	11.2	3.4e-43	147.2	7.8	1	1	0	0	1	1	1	1	Tetraspanin family
isotig01002	PF00335.14	2.9e-43	147.4	11.2	3.4e-43	147.2	7.8	1	1	0	0	1	1	1	1	Tetraspanin family
isotig01003	PF00335.14	2.9e-43	147.4	11.2	3.4e-43	147.2	7.8	1	1	0	0	1	1	1	1	Tetraspanin family
isotig01017	PF03171.14	1.6e-11	44.1	0	2.6e-11	43.4	0	1.4	1	0	0	1	1	1	1	2OG-Fe(II) oxygenase superfamily
isotig01017	PF08336.5	8.5e-41	138.6	2	8.5e-41	138.6	1.4	2.1	2	0	0	2	2	1	1	Prolyl 4-Hydroxylase alpha-subunit, N-terminal region
isotig01018	PF03171.14	1.6e-11	44.1	0	2.6e-11	43.4	0	1.4	1	0	0	1	1	1	1	2OG-Fe(II) oxygenase superfamily
isotig01018	PF08336.5	8.5e-41	138.6	2	8.5e-41	138.6	1.4	2.1	2	0	0	2	2	1	1	Prolyl 4-Hydroxylase alpha-subunit, N-terminal region
isotig01019	PF03171.14	1.6e-11	44.1	0	2.6e-11	43.4	0	1.4	1	0	0	1	1	1	1	2OG-Fe(II) oxygenase superfamily
isotig01019	PF08336.5	8.5e-41	138.6	2	8.5e-41	138.6	1.4	2.1	2	0	0	2	2	1	1	Prolyl 4-Hydroxylase alpha-subunit, N-terminal region
isotig01020	PF03171.14	1.6e-11	44.1	0	2.6e-11	43.4	0	1.4	1	0	0	1	1	1	1	2OG-Fe(II) oxygenase superfamily
isotig01020	PF08336.5	8.5e-41	138.6	2	8.5e-41	138.6	1.4	2.1	2	0	0	2	2	1	1	Prolyl 4-Hydroxylase alpha-subunit, N-terminal region
isotig01021	PF03171.14	1.6e-11	44.1	0	2.6e-11	43.4	0	1.4	1	0	0	1	1	1	1	2OG-Fe(II) oxygenase superfamily
isotig01021	PF08336.5	8.5e-41	138.6	2	8.5e-41	138.6	1.4	2.1	2	0	0	2	2	1	1	Prolyl 4-Hydroxylase alpha-subunit, N-terminal region
isotig01022	PF03171.14	1.6e-11	44.1	0	2.6e-11	43.4	0	1.4	1	0	0	1	1	1	1	2OG-Fe(II) oxygenase superfamily
isotig01022	PF08336.5	8.5e-41	138.6	2	8.5e-41	138.6	1.4	2.1	2	0	0	2	2	1	1	Prolyl 4-Hydroxylase alpha-subunit, N-terminal region
isotig01023	PF03171.14	1.6e-11	44.1	0	2.6e-11	43.4	0	1.4	1	0	0	1	1	1	1	2OG-Fe(II) oxygenase superfamily
isotig01023	PF08336.5	8.5e-41	138.6	2	8.5e-41	138.6	1.4	2.1	2	0	0	2	2	1	1	Prolyl 4-Hydroxylase alpha-subunit, N-terminal region
isotig01024	PF03171.14	1.6e-11	44.1	0	2.6e-11	43.4	0	1.4	1	0	0	1	1	1	1	2OG-Fe(II) oxygenase superfamily
isotig01024	PF08336.5	8.5e-41	138.6	2	8.5e-41	138.6	1.4	2.1	2	0	0	2	2	1	1	Prolyl 4-Hydroxylase alpha-subunit, N-terminal region
isotig01025	PF00109.20	2.4e-07	30.2	0.3	1.2e-06	28	0.1	2.1	2	0	0	2	2	1	1	Beta-ketoacyl synthase, N-terminal domain
isotig01025	PF02803.12	1.3e-43	147	0	2.3e-43	146.2	0	1.4	1	0	0	1	1	1	1	Thiolase, C-terminal domain
isotig01025	PF00108.1	3.7e-83	278.2	0	5.4e-83	277.7	0	1.2	1	0	0	1	1	1	1	Thiolase, N-terminal domain
isotig01028	PF00109.20	2.4e-07	30.2	0.3	1.2e-06	28	0.1	2.1	2	0	0	2	2	1	1	Beta-ketoacyl synthase, N-terminal domain
isotig01028	PF02803.12	1.3e-43	147	0	2.3e-43	146.2	0	1.4	1	0	0	1	1	1	1	Thiolase, C-terminal domain
isotig01028	PF00108.1	3.7e-83	278.2	0	5.4e-83	277.7	0	1.2	1	0	0	1	1	1	1	Thiolase, N-terminal domain
isotig01030	PF00109.20	2.4e-07	30.2	0.3	1.2e-06	28	0.1	2.1	2	0	0	2	2	1	1	Beta-ketoacyl synthase, N-terminal domain
isotig01030	PF02803.12	1.3e-43	147	0	2.3e-43	146.2	0	1.4	1	0	0	1	1	1	1	Thiolase, C-terminal domain
isotig01030	PF00108.1	3.7e-83	278.2	0	5.4e-83	277.7	0	1.2	1	0	0	1	1	1	1	Thiolase, N-terminal domain
isotig01031	PF03171.14	1.6e-11	44.1	0	2.6e-11	43.4	0	1.4	1	0	0	1	1	1	1	2OG-Fe(II) oxygenase superfamily
isotig01031	PF08336.5	8.5e-41	138.6	2	8.5e-41	138.6	1.4	2.1	2	0	0	2	2	1	1	Prolyl 4-Hydroxylase alpha-subunit, N-terminal region
isotig01034	PF06838.5	2.5e-06	25.8	0.1	4.2e-06	25	0.1	1.5	1	1	0	1	1	1	1	Aluminium resistance protein
isotig01034	PF00155.15	2.4e-05	23.1	0	3.8e-05	22.5	0	1.3	1	0	0	1	1	1	1	Aminotransferase class I and II
isotig01034	PF01053.14	2.4e-146	486.6	0	2.8e-146	486.5	0	1	1	0	0	1	1	1	1	Cys/Met metabolism PLP-dependent enzyme
isotig01035	PF06838.5	2.5e-06	25.8	0.1	4.2e-06	25	0.1	1.5	1	1	0	1	1	1	1	Aluminium resistance protein
isotig01035	PF00155.15	2.4e-05	23.1	0	3.8e-05	22.5	0	1.3	1	0	0	1	1	1	1	Aminotransferase class I and II
isotig01035	PF01053.14	2.4e-146	486.6	0	2.8e-146	486.5	0	1	1	0	0	1	1	1	1	Cys/Met metabolism PLP-dependent enzyme
isotig01036	PF06838.5	2.5e-06	25.8	0.1	4.2e-06	25	0.1	1.5	1	1	0	1	1	1	1	Aluminium resistance protein
isotig01036	PF00155.15	2.4e-05	23.1	0	3.8e-05	22.5	0	1.3	1	0	0	1	1	1	1	Aminotransferase class I and II
isotig01036	PF01053.14	2.4e-146	486.6	0	2.8e-146	486.5	0	1	1	0	0	1	1	1	1	Cys/Met metabolism PLP-dependent enzyme
isotig01037	PF06838.5	2.5e-06	25.8	0.1	4.2e-06	25	0.1	1.5	1	1	0	1	1	1	1	Aluminium resistance protein
isotig01037	PF00155.15	2.4e-05	23.1	0	3.8e-05	22.5	0	1.3	1	0	0	1	1	1	1	Aminotransferase class I and II
isotig01037	PF01053.14	2.4e-146	486.6	0	2.8e-146	486.5	0	1	1	0	0	1	1	1	1	Cys/Met metabolism PLP-dependent enzyme
isotig01038	PF06838.5	2.5e-06	25.8	0.1	4.2e-06	25	0.1	1.5	1	1	0	1	1	1	1	Aluminium resistance protein
isotig01038	PF00155.15	2.4e-05	23.1	0	3.8e-05	22.5	0	1.3	1	0	0	1	1	1	1	Aminotransferase class I and II
isotig01038	PF01053.14	2.4e-146	486.6	0	2.8e-146	486.5	0	1	1	0	0	1	1	1	1	Cys/Met metabolism PLP-dependent enzyme
isotig01039	PF06838.5	2.5e-06	25.8	0.1	4.2e-06	25	0.1	1.5	1	1	0	1	1	1	1	Aluminium resistance protein
isotig01039	PF00155.15	2.4e-05	23.1	0	3.8e-05	22.5	0	1.3	1	0	0	1	1	1	1	Aminotransferase class I and II
isotig01039	PF01053.14	2.4e-146	486.6	0	2.8e-146	486.5	0	1	1	0	0	1	1	1	1	Cys/Met metabolism PLP-dependent enzyme
isotig01040	PF06838.5	2.5e-06	25.8	0.1	4.2e-06	25	0.1	1.5	1	1	0	1	1	1	1	Aluminium resistance protein
isotig01040	PF00155.15	2.4e-05	23.1	0	3.8e-05	22.5	0	1.3	1	0	0	1	1	1	1	Aminotransferase class I and II
isotig01040	PF01053.14	2.4e-146	486.6	0	2.8e-146	486.5	0	1	1	0	0	1	1	1	1	Cys/Met metabolism PLP-dependent enzyme
isotig01041	PF06838.5	2.5e-06	25.8	0.1	4.2e-06	25	0.1	1.5	1	1	0	1	1	1	1	Aluminium resistance protein
isotig01041	PF00155.15	2.4e-05	23.1	0	3.8e-05	22.5	0	1.3	1	0	0	1	1	1	1	Aminotransferase class I and II
isotig01041	PF01053.14	2.4e-146	486.6	0	2.8e-146	486.5	0	1	1	0	0	1	1	1	1	Cys/Met metabolism PLP-dependent enzyme
isotig01042	PF06838.5	2.5e-06	25.8	0.1	4.2e-06	25	0.1	1.5	1	1	0	1	1	1	1	Aluminium resistance protein
isotig01042	PF00155.15	2.4e-05	23.1	0	3.8e-05	22.5	0	1.3	1	0	0	1	1	1	1	Aminotransferase class I and II
isotig01042	PF01053.14	2.4e-146	486.6	0	2.8e-146	486.5	0	1	1	0	0	1	1	1	1	Cys/Met metabolism PLP-dependent enzyme
isotig01043	PF06838.5	2.5e-06	25.8	0.1	4.2e-06	25	0.1	1.5	1	1	0	1	1	1	1	Aluminium resistance protein
isotig01043	PF00155.15	2.4e-05	23.1	0	3.8e-05	22.5	0	1.3	1	0	0	1	1	1	1	Aminotransferase class I and II
isotig01043	PF01053.14	2.4e-146	486.6	0	2.8e-146	486.5	0	1	1	0	0	1	1	1	1	Cys/Met metabolism PLP-dependent enzyme
isotig01044	PF06838.5	2.5e-06	25.8	0.1	4.2e-06	25	0.1	1.5	1	1	0	1	1	1	1	Aluminium resistance protein
isotig01044	PF00155.15	2.4e-05	23.1	0	3.8e-05	22.5	0	1.3	1	0	0	1	1	1	1	Aminotransferase class I and II
isotig01044	PF01053.14	2.4e-146	486.6	0	2.8e-146	486.5	0	1	1	0	0	1	1	1	1	Cys/Met metabolism PLP-dependent enzyme
isotig01045	PF06838.5	2.5e-06	25.8	0.1	4.2e-06	25	0.1	1.5	1	1	0	1	1	1	1	Aluminium resistance protein
isotig01045	PF00155.15	2.4e-05	23.1	0	3.8e-05	22.5	0	1.3	1	0	0	1	1	1	1	Aminotransferase class I and II
isotig01045	PF01053.14	2.4e-146	486.6	0	2.8e-146	486.5	0	1	1	0	0	1	1	1	1	Cys/Met metabolism PLP-dependent enzyme
isotig01046	PF06838.5	2.5e-06	25.8	0.1	4.2e-06	25	0.1	1.5	1	1	0	1	1	1	1	Aluminium resistance protein
isotig01046	PF00155.15	2.4e-05	23.1	0	3.8e-05	22.5	0	1.3	1	0	0	1	1	1	1	Aminotransferase class I and II
isotig01046	PF01053.14	2.4e-146	486.6	0	2.8e-146	486.5	0	1	1	0	0	1	1	1	1	Cys/Met metabolism PLP-dependent enzyme
isotig01047	PF06838.5	2.5e-06	25.8	0.1	4.2e-06	25	0.1	1.5	1	1	0	1	1	1	1	Aluminium resistance protein
isotig01047	PF00155.15	2.4e-05	23.1	0	3.8e-05	22.5	0	1.3	1	0	0	1	1	1	1	Aminotransferase class I and II
isotig01047	PF01053.14	2.4e-146	486.6	0	2.8e-146	486.5	0	1	1	0	0	1	1	1	1	Cys/Met metabolism PLP-dependent enzyme
isotig01048	PF06838.5	2.5e-06	25.8	0.1	4.2e-06	25	0.1	1.5	1	1	0	1	1	1	1	Aluminium resistance protein
isotig01048	PF00155.15	2.4e-05	23.1	0	3.8e-05	22.5	0	1.3	1	0	0	1	1	1	1	Aminotransferase class I and II
isotig01048	PF01053.14	2.4e-146	486.6	0	2.8e-146	486.5	0	1	1	0	0	1	1	1	1	Cys/Met metabolism PLP-dependent enzyme
isotig01049	PF06838.5	2.5e-06	25.8	0.1	4.2e-06	25	0.1	1.5	1	1	0	1	1	1	1	Aluminium resistance protein
isotig01049	PF00155.15	2.4e-05	23.1	0	3.8e-05	22.5	0	1.3	1	0	0	1	1	1	1	Aminotransferase class I and II
isotig01049	PF01053.14	2.4e-146	486.6	0	2.8e-146	486.5	0	1	1	0	0	1	1	1	1	Cys/Met metabolism PLP-dependent enzyme
isotig01050	PF06838.5	2.5e-06	25.8	0.1	4.2e-06	25	0.1	1.5	1	1	0	1	1	1	1	Aluminium resistance protein
isotig01050	PF00155.15	2.4e-05	23.1	0	3.8e-05	22.5	0	1.3	1	0	0	1	1	1	1	Aminotransferase class I and II
isotig01050	PF01053.14	2.4e-146	486.6	0	2.8e-146	486.5	0	1	1	0	0	1	1	1	1	Cys/Met metabolism PLP-dependent enzyme
isotig01051	PF06838.5	2.5e-06	25.8	0.1	4.2e-06	25	0.1	1.5	1	1	0	1	1	1	1	Aluminium resistance protein
isotig01051	PF00155.15	2.4e-05	23.1	0	3.8e-05	22.5	0	1.3	1	0	0	1	1	1	1	Aminotransferase class I and II
isotig01051	PF01053.14	2.4e-146	486.6	0	2.8e-146	486.5	0	1	1	0	0	1	1	1	1	Cys/Met metabolism PLP-dependent enzyme
isotig01052	PF06838.5	2.5e-06	25.8	0.1	4.2e-06	25	0.1	1.5	1	1	0	1	1	1	1	Aluminium resistance protein
isotig01052	PF00155.15	2.4e-05	23.1	0	3.8e-05	22.5	0	1.3	1	0	0	1	1	1	1	Aminotransferase class I and II
isotig01052	PF01053.14	2.4e-146	486.6	0	2.8e-146	486.5	0	1	1	0	0	1	1	1	1	Cys/Met metabolism PLP-dependent enzyme
isotig01053	PF06838.5	2.5e-06	25.8	0.1	4.2e-06	25	0.1	1.5	1	1	0	1	1	1	1	Aluminium resistance protein
isotig01053	PF00155.15	2.4e-05	23.1	0	3.8e-05	22.5	0	1.3	1	0	0	1	1	1	1	Aminotransferase class I and II
isotig01053	PF01053.14	2.4e-146	486.6	0	2.8e-146	486.5	0	1	1	0	0	1	1	1	1	Cys/Met metabolism PLP-dependent enzyme
isotig01054	PF06838.5	2.5e-06	25.8	0.1	4.2e-06	25	0.1	1.5	1	1	0	1	1	1	1	Aluminium resistance protein
isotig01054	PF00155.15	2.4e-05	23.1	0	3.8e-05	22.5	0	1.3	1	0	0	1	1	1	1	Aminotransferase class I and II
isotig01054	PF01053.14	2.4e-146	486.6	0	2.8e-146	486.5	0	1	1	0	0	1	1	1	1	Cys/Met metabolism PLP-dependent enzyme
isotig01055	PF06838.5	2.5e-06	25.8	0.1	4.2e-06	25	0.1	1.5	1	1	0	1	1	1	1	Aluminium resistance protein
isotig01055	PF00155.15	2.4e-05	23.1	0	3.8e-05	22.5	0	1.3	1	0	0	1	1	1	1	Aminotransferase class I and II
isotig01055	PF01053.14	2.4e-146	486.6	0	2.8e-146	486.5	0	1	1	0	0	1	1	1	1	Cys/Met metabolism PLP-dependent enzyme
isotig01056	PF06838.5	2.5e-06	25.8	0.1	4.2e-06	25	0.1	1.5	1	1	0	1	1	1	1	Aluminium resistance protein
isotig01056	PF00155.15	2.4e-05	23.1	0	3.8e-05	22.5	0	1.3	1	0	0	1	1	1	1	Aminotransferase class I and II
isotig01056	PF01053.14	2.4e-146	486.6	0	2.8e-146	486.5	0	1	1	0	0	1	1	1	1	Cys/Met metabolism PLP-dependent enzyme
isotig01057	PF06838.5	2.5e-06	25.8	0.1	4.2e-06	25	0.1	1.5	1	1	0	1	1	1	1	Aluminium resistance protein
isotig01057	PF00155.15	2.4e-05	23.1	0	3.8e-05	22.5	0	1.3	1	0	0	1	1	1	1	Aminotransferase class I and II
isotig01057	PF01053.14	2.4e-146	486.6	0	2.8e-146	486.5	0	1	1	0	0	1	1	1	1	Cys/Met metabolism PLP-dependent enzyme
isotig01058	PF12795.1	0.00061	18.9	0.3	0.00073	18.6	0.2	1.2	1	0	0	1	1	1	1	Mechanosensitive ion channel porin domain
isotig01059	PF12795.1	0.00061	18.9	0.3	0.00073	18.6	0.2	1.2	1	0	0	1	1	1	1	Mechanosensitive ion channel porin domain
isotig01060	PF12795.1	0.00061	18.9	0.3	0.00073	18.6	0.2	1.2	1	0	0	1	1	1	1	Mechanosensitive ion channel porin domain
isotig01061	PF12795.1	0.00061	18.9	0.3	0.00073	18.6	0.2	1.2	1	0	0	1	1	1	1	Mechanosensitive ion channel porin domain
isotig01062	PF12795.1	0.00061	18.9	0.3	0.00073	18.6	0.2	1.2	1	0	0	1	1	1	1	Mechanosensitive ion channel porin domain
isotig01063	PF12795.1	0.00061	18.9	0.3	0.00073	18.6	0.2	1.2	1	0	0	1	1	1	1	Mechanosensitive ion channel porin domain
isotig01064	PF12795.1	0.00061	18.9	0.3	0.00073	18.6	0.2	1.2	1	0	0	1	1	1	1	Mechanosensitive ion channel porin domain
isotig01065	PF12795.1	0.00061	18.9	0.3	0.00073	18.6	0.2	1.2	1	0	0	1	1	1	1	Mechanosensitive ion channel porin domain
isotig01066	PF12795.1	0.00061	18.9	0.3	0.00073	18.6	0.2	1.2	1	0	0	1	1	1	1	Mechanosensitive ion channel porin domain
isotig01067	PF12795.1	0.00061	18.9	0.3	0.00073	18.6	0.2	1.2	1	0	0	1	1	1	1	Mechanosensitive ion channel porin domain
isotig01068	PF12795.1	0.00061	18.9	0.3	0.00073	18.6	0.2	1.2	1	0	0	1	1	1	1	Mechanosensitive ion channel porin domain
isotig01069	PF12795.1	0.00061	18.9	0.3	0.00073	18.6	0.2	1.2	1	0	0	1	1	1	1	Mechanosensitive ion channel porin domain
isotig01070	PF12795.1	0.00061	18.9	0.3	0.00073	18.6	0.2	1.2	1	0	0	1	1	1	1	Mechanosensitive ion channel porin domain
isotig01071	PF12795.1	0.00061	18.9	0.3	0.00073	18.6	0.2	1.2	1	0	0	1	1	1	1	Mechanosensitive ion channel porin domain
isotig01072	PF12795.1	0.00061	18.9	0.3	0.00073	18.6	0.2	1.2	1	0	0	1	1	1	1	Mechanosensitive ion channel porin domain
isotig01073	PF12795.1	0.00061	18.9	0.3	0.00073	18.6	0.2	1.2	1	0	0	1	1	1	1	Mechanosensitive ion channel porin domain
isotig01074	PF12795.1	0.00061	18.9	0.3	0.00073	18.6	0.2	1.2	1	0	0	1	1	1	1	Mechanosensitive ion channel porin domain
isotig01075	PF12795.1	0.00061	18.9	0.3	0.00073	18.6	0.2	1.2	1	0	0	1	1	1	1	Mechanosensitive ion channel porin domain
isotig01076	PF12795.1	0.00061	18.9	0.3	0.00073	18.6	0.2	1.2	1	0	0	1	1	1	1	Mechanosensitive ion channel porin domain
isotig01077	PF12795.1	0.00061	18.9	0.3	0.00073	18.6	0.2	1.2	1	0	0	1	1	1	1	Mechanosensitive ion channel porin domain
isotig01078	PF12795.1	0.00061	18.9	0.3	0.00073	18.6	0.2	1.2	1	0	0	1	1	1	1	Mechanosensitive ion channel porin domain
isotig01079	PF12795.1	0.00061	18.9	0.3	0.00073	18.6	0.2	1.2	1	0	0	1	1	1	1	Mechanosensitive ion channel porin domain
isotig01080	PF12795.1	0.00061	18.9	0.3	0.00073	18.6	0.2	1.2	1	0	0	1	1	1	1	Mechanosensitive ion channel porin domain
isotig01081	PF12795.1	0.00061	18.9	0.3	0.00073	18.6	0.2	1.2	1	0	0	1	1	1	1	Mechanosensitive ion channel porin domain
isotig01082	PF12795.1	0.00061	18.9	0.3	0.00073	18.6	0.2	1.2	1	0	0	1	1	1	1	Mechanosensitive ion channel porin domain
isotig01083	PF12795.1	0.00061	18.9	0.3	0.00073	18.6	0.2	1.2	1	0	0	1	1	1	1	Mechanosensitive ion channel porin domain
isotig01084	PF12795.1	0.00061	18.9	0.3	0.00073	18.6	0.2	1.2	1	0	0	1	1	1	1	Mechanosensitive ion channel porin domain
isotig01085	PF12795.1	0.00061	18.9	0.3	0.00073	18.6	0.2	1.2	1	0	0	1	1	1	1	Mechanosensitive ion channel porin domain
isotig01086	PF12795.1	0.00061	18.9	0.3	0.00073	18.6	0.2	1.2	1	0	0	1	1	1	1	Mechanosensitive ion channel porin domain
isotig01087	PF12795.1	0.00061	18.9	0.3	0.00073	18.6	0.2	1.2	1	0	0	1	1	1	1	Mechanosensitive ion channel porin domain
isotig01088	PF12795.1	0.00061	18.9	0.3	0.00073	18.6	0.2	1.2	1	0	0	1	1	1	1	Mechanosensitive ion channel porin domain
isotig01089	PF12795.1	0.00061	18.9	0.3	0.00073	18.6	0.2	1.2	1	0	0	1	1	1	1	Mechanosensitive ion channel porin domain
isotig01090	PF12795.1	0.00061	18.9	0.3	0.00073	18.6	0.2	1.2	1	0	0	1	1	1	1	Mechanosensitive ion channel porin domain
isotig01091	PF12795.1	0.00061	18.9	0.3	0.00073	18.6	0.2	1.2	1	0	0	1	1	1	1	Mechanosensitive ion channel porin domain
isotig01092	PF12795.1	0.00061	18.9	0.3	0.00073	18.6	0.2	1.2	1	0	0	1	1	1	1	Mechanosensitive ion channel porin domain
isotig01093	PF12795.1	0.00061	18.9	0.3	0.00073	18.6	0.2	1.2	1	0	0	1	1	1	1	Mechanosensitive ion channel porin domain
isotig01094	PF12795.1	0.00061	18.9	0.3	0.00073	18.6	0.2	1.2	1	0	0	1	1	1	1	Mechanosensitive ion channel porin domain
isotig01095	PF12795.1	0.00061	18.9	0.3	0.00073	18.6	0.2	1.2	1	0	0	1	1	1	1	Mechanosensitive ion channel porin domain
isotig01096	PF12795.1	0.00061	18.9	0.3	0.00073	18.6	0.2	1.2	1	0	0	1	1	1	1	Mechanosensitive ion channel porin domain
isotig01097	PF12795.1	0.00061	18.9	0.3	0.00073	18.6	0.2	1.2	1	0	0	1	1	1	1	Mechanosensitive ion channel porin domain
isotig01098	PF06838.5	2.5e-06	25.8	0.1	4.2e-06	25	0.1	1.5	1	1	0	1	1	1	1	Aluminium resistance protein
isotig01098	PF00155.15	2.4e-05	23.1	0	3.8e-05	22.5	0	1.3	1	0	0	1	1	1	1	Aminotransferase class I and II
isotig01098	PF01053.14	2.4e-146	486.6	0	2.8e-146	486.5	0	1	1	0	0	1	1	1	1	Cys/Met metabolism PLP-dependent enzyme
isotig01099	PF12795.1	0.00061	18.9	0.3	0.00073	18.6	0.2	1.2	1	0	0	1	1	1	1	Mechanosensitive ion channel porin domain
isotig01100	PF12795.1	0.00061	18.9	0.3	0.00073	18.6	0.2	1.2	1	0	0	1	1	1	1	Mechanosensitive ion channel porin domain
isotig01101	PF12795.1	0.00061	18.9	0.3	0.00073	18.6	0.2	1.2	1	0	0	1	1	1	1	Mechanosensitive ion channel porin domain
isotig01102	PF12795.1	0.00061	18.9	0.3	0.00073	18.6	0.2	1.2	1	0	0	1	1	1	1	Mechanosensitive ion channel porin domain
isotig01103	PF12795.1	0.00061	18.9	0.3	0.00073	18.6	0.2	1.2	1	0	0	1	1	1	1	Mechanosensitive ion channel porin domain
isotig01104	PF12795.1	0.00061	18.9	0.3	0.00073	18.6	0.2	1.2	1	0	0	1	1	1	1	Mechanosensitive ion channel porin domain
isotig01105	PF12795.1	0.00061	18.9	0.3	0.00073	18.6	0.2	1.2	1	0	0	1	1	1	1	Mechanosensitive ion channel porin domain
isotig01106	PF12795.1	0.00061	18.9	0.3	0.00073	18.6	0.2	1.2	1	0	0	1	1	1	1	Mechanosensitive ion channel porin domain
isotig01107	PF12795.1	0.00061	18.9	0.3	0.00073	18.6	0.2	1.2	1	0	0	1	1	1	1	Mechanosensitive ion channel porin domain
isotig01108	PF12795.1	0.00061	18.9	0.3	0.00073	18.6	0.2	1.2	1	0	0	1	1	1	1	Mechanosensitive ion channel porin domain
isotig01112	PF00487.18	4.6e-06	25.9	6.8	4.6e-06	25.9	4.7	1.5	1	1	0	1	1	1	1	Fatty acid desaturase
isotig01113	PF00487.18	4.6e-06	25.9	6.8	4.6e-06	25.9	4.7	1.5	1	1	0	1	1	1	1	Fatty acid desaturase
isotig01114	PF00487.18	4.6e-06	25.9	6.8	4.6e-06	25.9	4.7	1.5	1	1	0	1	1	1	1	Fatty acid desaturase
isotig01115	PF00487.18	4.6e-06	25.9	6.8	4.6e-06	25.9	4.7	1.5	1	1	0	1	1	1	1	Fatty acid desaturase
isotig01116	PF00487.18	4.6e-06	25.9	6.8	4.6e-06	25.9	4.7	1.5	1	1	0	1	1	1	1	Fatty acid desaturase
isotig01117	PF00487.18	4.6e-06	25.9	6.8	4.6e-06	25.9	4.7	1.5	1	1	0	1	1	1	1	Fatty acid desaturase
isotig01118	PF00487.18	4.6e-06	25.9	6.8	4.6e-06	25.9	4.7	1.5	1	1	0	1	1	1	1	Fatty acid desaturase
isotig01119	PF00487.18	4.6e-06	25.9	6.8	4.6e-06	25.9	4.7	1.5	1	1	0	1	1	1	1	Fatty acid desaturase
isotig01120	PF00487.18	4.6e-06	25.9	6.8	4.6e-06	25.9	4.7	1.5	1	1	0	1	1	1	1	Fatty acid desaturase
isotig01121	PF00487.18	4.6e-06	25.9	6.8	4.6e-06	25.9	4.7	1.5	1	1	0	1	1	1	1	Fatty acid desaturase
isotig01122	PF00487.18	4.6e-06	25.9	6.8	4.6e-06	25.9	4.7	1.5	1	1	0	1	1	1	1	Fatty acid desaturase
isotig01123	PF00487.18	4.6e-06	25.9	6.8	4.6e-06	25.9	4.7	1.5	1	1	0	1	1	1	1	Fatty acid desaturase
isotig01124	PF00487.18	4.6e-06	25.9	6.8	4.6e-06	25.9	4.7	1.5	1	1	0	1	1	1	1	Fatty acid desaturase
isotig01125	PF00487.18	4.6e-06	25.9	6.8	4.6e-06	25.9	4.7	1.5	1	1	0	1	1	1	1	Fatty acid desaturase
isotig01126	PF00487.18	4.6e-06	25.9	6.8	4.6e-06	25.9	4.7	1.5	1	1	0	1	1	1	1	Fatty acid desaturase
isotig01127	PF00487.18	4.6e-06	25.9	6.8	4.6e-06	25.9	4.7	1.5	1	1	0	1	1	1	1	Fatty acid desaturase
isotig01128	PF00487.18	4.6e-06	25.9	6.8	4.6e-06	25.9	4.7	1.5	1	1	0	1	1	1	1	Fatty acid desaturase
isotig01129	PF00487.18	4.6e-06	25.9	6.8	4.6e-06	25.9	4.7	1.5	1	1	0	1	1	1	1	Fatty acid desaturase
isotig01130	PF00487.18	4.6e-06	25.9	6.8	4.6e-06	25.9	4.7	1.5	1	1	0	1	1	1	1	Fatty acid desaturase
isotig01131	PF00487.18	4.6e-06	25.9	6.8	4.6e-06	25.9	4.7	1.5	1	1	0	1	1	1	1	Fatty acid desaturase
isotig01132	PF00487.18	4.6e-06	25.9	6.8	4.6e-06	25.9	4.7	1.5	1	1	0	1	1	1	1	Fatty acid desaturase
isotig01133	PF00487.18	4.6e-06	25.9	6.8	4.6e-06	25.9	4.7	1.5	1	1	0	1	1	1	1	Fatty acid desaturase
isotig01134	PF00487.18	4.6e-06	25.9	6.8	4.6e-06	25.9	4.7	1.5	1	1	0	1	1	1	1	Fatty acid desaturase
isotig01135	PF00487.18	4.6e-06	25.9	6.8	4.6e-06	25.9	4.7	1.5	1	1	0	1	1	1	1	Fatty acid desaturase
isotig01136	PF00487.18	4.6e-06	25.9	6.8	4.6e-06	25.9	4.7	1.5	1	1	0	1	1	1	1	Fatty acid desaturase
isotig01137	PF00487.18	4.6e-06	25.9	6.8	4.6e-06	25.9	4.7	1.5	1	1	0	1	1	1	1	Fatty acid desaturase
isotig01138	PF00487.18	4.6e-06	25.9	6.8	4.6e-06	25.9	4.7	1.5	1	1	0	1	1	1	1	Fatty acid desaturase
isotig01139	PF00487.18	4.6e-06	25.9	6.8	4.6e-06	25.9	4.7	1.5	1	1	0	1	1	1	1	Fatty acid desaturase
isotig01140	PF00487.18	4.6e-06	25.9	6.8	4.6e-06	25.9	4.7	1.5	1	1	0	1	1	1	1	Fatty acid desaturase
isotig01141	PF00487.18	4.6e-06	25.9	6.8	4.6e-06	25.9	4.7	1.5	1	1	0	1	1	1	1	Fatty acid desaturase
isotig01142	PF00487.18	4.6e-06	25.9	6.8	4.6e-06	25.9	4.7	1.5	1	1	0	1	1	1	1	Fatty acid desaturase
isotig01143	PF00487.18	4.6e-06	25.9	6.8	4.6e-06	25.9	4.7	1.5	1	1	0	1	1	1	1	Fatty acid desaturase
isotig01144	PF00487.18	4.6e-06	25.9	6.8	4.6e-06	25.9	4.7	1.5	1	1	0	1	1	1	1	Fatty acid desaturase
isotig01145	PF00487.18	4.6e-06	25.9	6.8	4.6e-06	25.9	4.7	1.5	1	1	0	1	1	1	1	Fatty acid desaturase
isotig01146	PF00487.18	4.6e-06	25.9	6.8	4.6e-06	25.9	4.7	1.5	1	1	0	1	1	1	1	Fatty acid desaturase
isotig01147	PF00487.18	4.6e-06	25.9	6.8	4.6e-06	25.9	4.7	1.5	1	1	0	1	1	1	1	Fatty acid desaturase
isotig01148	PF00487.18	4.6e-06	25.9	6.8	4.6e-06	25.9	4.7	1.5	1	1	0	1	1	1	1	Fatty acid desaturase
isotig01149	PF00487.18	4.6e-06	25.9	6.8	4.6e-06	25.9	4.7	1.5	1	1	0	1	1	1	1	Fatty acid desaturase
isotig01150	PF00487.18	4.6e-06	25.9	6.8	4.6e-06	25.9	4.7	1.5	1	1	0	1	1	1	1	Fatty acid desaturase
isotig01151	PF00487.18	4.6e-06	25.9	6.8	4.6e-06	25.9	4.7	1.5	1	1	0	1	1	1	1	Fatty acid desaturase
isotig01152	PF00487.18	4.6e-06	25.9	6.8	4.6e-06	25.9	4.7	1.5	1	1	0	1	1	1	1	Fatty acid desaturase
isotig01153	PF00487.18	4.6e-06	25.9	6.8	4.6e-06	25.9	4.7	1.5	1	1	0	1	1	1	1	Fatty acid desaturase
isotig01154	PF00487.18	4.6e-06	25.9	6.8	4.6e-06	25.9	4.7	1.5	1	1	0	1	1	1	1	Fatty acid desaturase
isotig01155	PF00487.18	4.6e-06	25.9	6.8	4.6e-06	25.9	4.7	1.5	1	1	0	1	1	1	1	Fatty acid desaturase
isotig01156	PF00487.18	4.6e-06	25.9	6.8	4.6e-06	25.9	4.7	1.5	1	1	0	1	1	1	1	Fatty acid desaturase
isotig01157	PF00487.18	4.6e-06	25.9	6.8	4.6e-06	25.9	4.7	1.5	1	1	0	1	1	1	1	Fatty acid desaturase
isotig01158	PF00487.18	4.6e-06	25.9	6.8	4.6e-06	25.9	4.7	1.5	1	1	0	1	1	1	1	Fatty acid desaturase
isotig01159	PF00487.18	4.6e-06	25.9	6.8	4.6e-06	25.9	4.7	1.5	1	1	0	1	1	1	1	Fatty acid desaturase
isotig01160	PF00487.18	4.6e-06	25.9	6.8	4.6e-06	25.9	4.7	1.5	1	1	0	1	1	1	1	Fatty acid desaturase
isotig01161	PF00487.18	4.6e-06	25.9	6.8	4.6e-06	25.9	4.7	1.5	1	1	0	1	1	1	1	Fatty acid desaturase
isotig01162	PF00487.18	4.6e-06	25.9	6.8	4.6e-06	25.9	4.7	1.5	1	1	0	1	1	1	1	Fatty acid desaturase
isotig01163	PF00487.18	4.6e-06	25.9	6.8	4.6e-06	25.9	4.7	1.5	1	1	0	1	1	1	1	Fatty acid desaturase
isotig01164	PF00487.18	4.6e-06	25.9	6.8	4.6e-06	25.9	4.7	1.5	1	1	0	1	1	1	1	Fatty acid desaturase
isotig01165	PF00487.18	4.6e-06	25.9	6.8	4.6e-06	25.9	4.7	1.5	1	1	0	1	1	1	1	Fatty acid desaturase
isotig01166	PF00487.18	4.6e-06	25.9	6.8	4.6e-06	25.9	4.7	1.5	1	1	0	1	1	1	1	Fatty acid desaturase
isotig01167	PF00487.18	4.6e-06	25.9	6.8	4.6e-06	25.9	4.7	1.5	1	1	0	1	1	1	1	Fatty acid desaturase
isotig01168	PF00487.18	4.6e-06	25.9	6.8	4.6e-06	25.9	4.7	1.5	1	1	0	1	1	1	1	Fatty acid desaturase
isotig01169	PF00487.18	4.6e-06	25.9	6.8	4.6e-06	25.9	4.7	1.5	1	1	0	1	1	1	1	Fatty acid desaturase
isotig01170	PF00487.18	4.6e-06	25.9	6.8	4.6e-06	25.9	4.7	1.5	1	1	0	1	1	1	1	Fatty acid desaturase
isotig01171	PF00487.18	4.6e-06	25.9	6.8	4.6e-06	25.9	4.7	1.5	1	1	0	1	1	1	1	Fatty acid desaturase
isotig01172	PF00487.18	4.6e-06	25.9	6.8	4.6e-06	25.9	4.7	1.5	1	1	0	1	1	1	1	Fatty acid desaturase
isotig01173	PF00487.18	4.6e-06	25.9	6.8	4.6e-06	25.9	4.7	1.5	1	1	0	1	1	1	1	Fatty acid desaturase
isotig01174	PF00487.18	4.6e-06	25.9	6.8	4.6e-06	25.9	4.7	1.5	1	1	0	1	1	1	1	Fatty acid desaturase
isotig01266	PF07690.10	4.3e-16	58.3	17.5	6.4e-16	57.7	12.1	1.3	1	1	0	1	1	1	1	Major Facilitator Superfamily
isotig01266	PF07690.10	7.2e-09	34.5	14.4	9.5e-09	34.1	10	1.1	1	0	0	1	1	1	1	Major Facilitator Superfamily
isotig01266	PF00083.18	3.4e-47	160.7	12.3	4.6e-47	160.3	8.5	1.1	1	0	0	1	1	1	1	Sugar (and other) transporter
isotig01266	PF00083.18	6.7e-38	130.1	20.4	7.3e-38	130	14.1	1	1	0	0	1	1	1	1	Sugar (and other) transporter
isotig01267	PF07690.10	4.3e-16	58.3	17.5	6.4e-16	57.7	12.1	1.3	1	1	0	1	1	1	1	Major Facilitator Superfamily
isotig01267	PF07690.10	7.2e-09	34.5	14.4	9.5e-09	34.1	10	1.1	1	0	0	1	1	1	1	Major Facilitator Superfamily
isotig01267	PF00083.18	3.4e-47	160.7	12.3	4.6e-47	160.3	8.5	1.1	1	0	0	1	1	1	1	Sugar (and other) transporter
isotig01267	PF00083.18	6.7e-38	130.1	20.4	7.3e-38	130	14.1	1	1	0	0	1	1	1	1	Sugar (and other) transporter
isotig01268	PF07690.10	4.3e-16	58.3	17.5	6.4e-16	57.7	12.1	1.3	1	1	0	1	1	1	1	Major Facilitator Superfamily
isotig01268	PF07690.10	7.2e-09	34.5	14.4	9.5e-09	34.1	10	1.1	1	0	0	1	1	1	1	Major Facilitator Superfamily
isotig01268	PF00083.18	3.4e-47	160.7	12.3	4.6e-47	160.3	8.5	1.1	1	0	0	1	1	1	1	Sugar (and other) transporter
isotig01268	PF00083.18	6.7e-38	130.1	20.4	7.3e-38	130	14.1	1	1	0	0	1	1	1	1	Sugar (and other) transporter
isotig01269	PF07690.10	4.3e-16	58.3	17.5	6.4e-16	57.7	12.1	1.3	1	1	0	1	1	1	1	Major Facilitator Superfamily
isotig01269	PF07690.10	7.2e-09	34.5	14.4	9.5e-09	34.1	10	1.1	1	0	0	1	1	1	1	Major Facilitator Superfamily
isotig01269	PF00083.18	3.4e-47	160.7	12.3	4.6e-47	160.3	8.5	1.1	1	0	0	1	1	1	1	Sugar (and other) transporter
isotig01269	PF00083.18	6.7e-38	130.1	20.4	7.3e-38	130	14.1	1	1	0	0	1	1	1	1	Sugar (and other) transporter
isotig01270	PF07690.10	7.2e-09	34.5	14.4	9.5e-09	34.1	10	1.1	1	0	0	1	1	1	1	Major Facilitator Superfamily
isotig01270	PF07690.10	4.3e-16	58.3	17.5	6.4e-16	57.7	12.1	1.3	1	1	0	1	1	1	1	Major Facilitator Superfamily
isotig01270	PF00083.18	6.7e-38	130.1	20.4	7.3e-38	130	14.1	1	1	0	0	1	1	1	1	Sugar (and other) transporter
isotig01270	PF00083.18	3.4e-47	160.7	12.3	4.6e-47	160.3	8.5	1.1	1	0	0	1	1	1	1	Sugar (and other) transporter
isotig01271	PF07690.10	7.2e-09	34.5	14.4	9.5e-09	34.1	10	1.1	1	0	0	1	1	1	1	Major Facilitator Superfamily
isotig01271	PF07690.10	4.3e-16	58.3	17.5	6.4e-16	57.7	12.1	1.3	1	1	0	1	1	1	1	Major Facilitator Superfamily
isotig01271	PF00083.18	6.7e-38	130.1	20.4	7.3e-38	130	14.1	1	1	0	0	1	1	1	1	Sugar (and other) transporter
isotig01271	PF00083.18	3.4e-47	160.7	12.3	4.6e-47	160.3	8.5	1.1	1	0	0	1	1	1	1	Sugar (and other) transporter
isotig01272	PF07690.10	4.3e-16	58.3	17.5	6.4e-16	57.7	12.1	1.3	1	1	0	1	1	1	1	Major Facilitator Superfamily
isotig01272	PF07690.10	7.2e-09	34.5	14.4	9.5e-09	34.1	10	1.1	1	0	0	1	1	1	1	Major Facilitator Superfamily
isotig01272	PF00083.18	3.4e-47	160.7	12.3	4.6e-47	160.3	8.5	1.1	1	0	0	1	1	1	1	Sugar (and other) transporter
isotig01272	PF00083.18	6.7e-38	130.1	20.4	7.3e-38	130	14.1	1	1	0	0	1	1	1	1	Sugar (and other) transporter
isotig01273	PF07690.10	7.2e-09	34.5	14.4	9.5e-09	34.1	10	1.1	1	0	0	1	1	1	1	Major Facilitator Superfamily
isotig01273	PF07690.10	4.3e-16	58.3	17.5	6.4e-16	57.7	12.1	1.3	1	1	0	1	1	1	1	Major Facilitator Superfamily
isotig01273	PF00083.18	6.7e-38	130.1	20.4	7.3e-38	130	14.1	1	1	0	0	1	1	1	1	Sugar (and other) transporter
isotig01273	PF00083.18	3.4e-47	160.7	12.3	4.6e-47	160.3	8.5	1.1	1	0	0	1	1	1	1	Sugar (and other) transporter
isotig01274	PF07690.10	4.3e-16	58.3	17.5	6.4e-16	57.7	12.1	1.3	1	1	0	1	1	1	1	Major Facilitator Superfamily
isotig01274	PF07690.10	7.2e-09	34.5	14.4	9.5e-09	34.1	10	1.1	1	0	0	1	1	1	1	Major Facilitator Superfamily
isotig01274	PF00083.18	3.4e-47	160.7	12.3	4.6e-47	160.3	8.5	1.1	1	0	0	1	1	1	1	Sugar (and other) transporter
isotig01274	PF00083.18	6.7e-38	130.1	20.4	7.3e-38	130	14.1	1	1	0	0	1	1	1	1	Sugar (and other) transporter
isotig01275	PF07690.10	4.3e-16	58.3	17.5	6.4e-16	57.7	12.1	1.3	1	1	0	1	1	1	1	Major Facilitator Superfamily
isotig01275	PF07690.10	7.2e-09	34.5	14.4	9.5e-09	34.1	10	1.1	1	0	0	1	1	1	1	Major Facilitator Superfamily
isotig01275	PF00083.18	3.4e-47	160.7	12.3	4.6e-47	160.3	8.5	1.1	1	0	0	1	1	1	1	Sugar (and other) transporter
isotig01275	PF00083.18	6.7e-38	130.1	20.4	7.3e-38	130	14.1	1	1	0	0	1	1	1	1	Sugar (and other) transporter
isotig01276	PF07690.10	7.2e-09	34.5	14.4	9.5e-09	34.1	10	1.1	1	0	0	1	1	1	1	Major Facilitator Superfamily
isotig01276	PF07690.10	4.3e-16	58.3	17.5	6.4e-16	57.7	12.1	1.3	1	1	0	1	1	1	1	Major Facilitator Superfamily
isotig01276	PF00083.18	6.7e-38	130.1	20.4	7.3e-38	130	14.1	1	1	0	0	1	1	1	1	Sugar (and other) transporter
isotig01276	PF00083.18	3.4e-47	160.7	12.3	4.6e-47	160.3	8.5	1.1	1	0	0	1	1	1	1	Sugar (and other) transporter
isotig01277	PF07690.10	1.7e-09	36.6	17	2.4e-09	36.1	11.8	1.2	1	0	0	1	1	1	1	Major Facilitator Superfamily
isotig01277	PF07690.10	5.1e-17	61.4	16.3	8.6e-17	60.6	11.4	1.3	1	1	0	1	1	1	1	Major Facilitator Superfamily
isotig01277	PF00083.18	8.9e-40	136.3	20.7	9.9e-40	136.1	14.3	1	1	0	0	1	1	1	1	Sugar (and other) transporter
isotig01277	PF00083.18	2.4e-55	187.6	13.6	3.2e-55	187.2	9.5	1.1	1	0	0	1	1	1	1	Sugar (and other) transporter
isotig01278	PF07690.10	4.3e-16	58.3	17.5	6.4e-16	57.7	12.1	1.3	1	1	0	1	1	1	1	Major Facilitator Superfamily
isotig01278	PF07690.10	7.2e-09	34.5	14.4	9.5e-09	34.1	10	1.1	1	0	0	1	1	1	1	Major Facilitator Superfamily
isotig01278	PF00083.18	3.4e-47	160.7	12.3	4.6e-47	160.3	8.5	1.1	1	0	0	1	1	1	1	Sugar (and other) transporter
isotig01278	PF00083.18	6.7e-38	130.1	20.4	7.3e-38	130	14.1	1	1	0	0	1	1	1	1	Sugar (and other) transporter
isotig01279	PF07690.10	7.2e-09	34.5	14.4	9.5e-09	34.1	10	1.1	1	0	0	1	1	1	1	Major Facilitator Superfamily
isotig01279	PF07690.10	4.3e-16	58.3	17.5	6.4e-16	57.7	12.1	1.3	1	1	0	1	1	1	1	Major Facilitator Superfamily
isotig01279	PF00083.18	6.7e-38	130.1	20.4	7.3e-38	130	14.1	1	1	0	0	1	1	1	1	Sugar (and other) transporter
isotig01279	PF00083.18	3.4e-47	160.7	12.3	4.6e-47	160.3	8.5	1.1	1	0	0	1	1	1	1	Sugar (and other) transporter
isotig01280	PF07690.10	5.1e-17	61.4	16.3	8.6e-17	60.6	11.4	1.3	1	1	0	1	1	1	1	Major Facilitator Superfamily
isotig01280	PF07690.10	1.7e-09	36.6	17	2.4e-09	36.1	11.8	1.2	1	0	0	1	1	1	1	Major Facilitator Superfamily
isotig01280	PF00083.18	2.4e-55	187.6	13.6	3.2e-55	187.2	9.5	1.1	1	0	0	1	1	1	1	Sugar (and other) transporter
isotig01280	PF00083.18	8.9e-40	136.3	20.7	9.9e-40	136.1	14.3	1	1	0	0	1	1	1	1	Sugar (and other) transporter
isotig01281	PF07690.10	4.3e-16	58.3	17.5	6.4e-16	57.7	12.1	1.3	1	1	0	1	1	1	1	Major Facilitator Superfamily
isotig01281	PF07690.10	7.2e-09	34.5	14.4	9.5e-09	34.1	10	1.1	1	0	0	1	1	1	1	Major Facilitator Superfamily
isotig01281	PF00083.18	3.4e-47	160.7	12.3	4.6e-47	160.3	8.5	1.1	1	0	0	1	1	1	1	Sugar (and other) transporter
isotig01281	PF00083.18	6.7e-38	130.1	20.4	7.3e-38	130	14.1	1	1	0	0	1	1	1	1	Sugar (and other) transporter
isotig01282	PF07690.10	4.3e-16	58.3	17.5	6.4e-16	57.7	12.1	1.3	1	1	0	1	1	1	1	Major Facilitator Superfamily
isotig01282	PF07690.10	7.2e-09	34.5	14.4	9.5e-09	34.1	10	1.1	1	0	0	1	1	1	1	Major Facilitator Superfamily
isotig01282	PF00083.18	3.4e-47	160.7	12.3	4.6e-47	160.3	8.5	1.1	1	0	0	1	1	1	1	Sugar (and other) transporter
isotig01282	PF00083.18	6.7e-38	130.1	20.4	7.3e-38	130	14.1	1	1	0	0	1	1	1	1	Sugar (and other) transporter
isotig01283	PF07690.10	4.3e-16	58.3	17.5	6.4e-16	57.7	12.1	1.3	1	1	0	1	1	1	1	Major Facilitator Superfamily
isotig01283	PF07690.10	7.2e-09	34.5	14.4	9.5e-09	34.1	10	1.1	1	0	0	1	1	1	1	Major Facilitator Superfamily
isotig01283	PF00083.18	3.4e-47	160.7	12.3	4.6e-47	160.3	8.5	1.1	1	0	0	1	1	1	1	Sugar (and other) transporter
isotig01283	PF00083.18	6.7e-38	130.1	20.4	7.3e-38	130	14.1	1	1	0	0	1	1	1	1	Sugar (and other) transporter
isotig01284	PF07690.10	4.3e-16	58.3	17.5	6.4e-16	57.7	12.1	1.3	1	1	0	1	1	1	1	Major Facilitator Superfamily
isotig01284	PF07690.10	7.2e-09	34.5	14.4	9.5e-09	34.1	10	1.1	1	0	0	1	1	1	1	Major Facilitator Superfamily
isotig01284	PF00083.18	3.4e-47	160.7	12.3	4.6e-47	160.3	8.5	1.1	1	0	0	1	1	1	1	Sugar (and other) transporter
isotig01284	PF00083.18	6.7e-38	130.1	20.4	7.3e-38	130	14.1	1	1	0	0	1	1	1	1	Sugar (and other) transporter
isotig01285	PF07690.10	4.3e-16	58.3	17.5	6.4e-16	57.7	12.1	1.3	1	1	0	1	1	1	1	Major Facilitator Superfamily
isotig01285	PF07690.10	7.2e-09	34.5	14.4	9.5e-09	34.1	10	1.1	1	0	0	1	1	1	1	Major Facilitator Superfamily
isotig01285	PF00083.18	3.4e-47	160.7	12.3	4.6e-47	160.3	8.5	1.1	1	0	0	1	1	1	1	Sugar (and other) transporter
isotig01285	PF00083.18	6.7e-38	130.1	20.4	7.3e-38	130	14.1	1	1	0	0	1	1	1	1	Sugar (and other) transporter
isotig01286	PF07690.10	4.3e-16	58.3	17.5	6.4e-16	57.7	12.1	1.3	1	1	0	1	1	1	1	Major Facilitator Superfamily
isotig01286	PF07690.10	7.2e-09	34.5	14.4	9.5e-09	34.1	10	1.1	1	0	0	1	1	1	1	Major Facilitator Superfamily
isotig01286	PF00083.18	3.4e-47	160.7	12.3	4.6e-47	160.3	8.5	1.1	1	0	0	1	1	1	1	Sugar (and other) transporter
isotig01286	PF00083.18	6.7e-38	130.1	20.4	7.3e-38	130	14.1	1	1	0	0	1	1	1	1	Sugar (and other) transporter
isotig01287	PF07690.10	4.3e-16	58.3	17.5	6.4e-16	57.7	12.1	1.3	1	1	0	1	1	1	1	Major Facilitator Superfamily
isotig01287	PF07690.10	7.2e-09	34.5	14.4	9.5e-09	34.1	10	1.1	1	0	0	1	1	1	1	Major Facilitator Superfamily
isotig01287	PF00083.18	3.4e-47	160.7	12.3	4.6e-47	160.3	8.5	1.1	1	0	0	1	1	1	1	Sugar (and other) transporter
isotig01287	PF00083.18	6.7e-38	130.1	20.4	7.3e-38	130	14.1	1	1	0	0	1	1	1	1	Sugar (and other) transporter
isotig01288	PF07690.10	5.1e-17	61.4	16.3	8.6e-17	60.6	11.4	1.3	1	1	0	1	1	1	1	Major Facilitator Superfamily
isotig01288	PF07690.10	1.7e-09	36.6	17	2.4e-09	36.1	11.8	1.2	1	0	0	1	1	1	1	Major Facilitator Superfamily
isotig01288	PF00083.18	2.4e-55	187.6	13.6	3.2e-55	187.2	9.5	1.1	1	0	0	1	1	1	1	Sugar (and other) transporter
isotig01288	PF00083.18	8.9e-40	136.3	20.7	9.9e-40	136.1	14.3	1	1	0	0	1	1	1	1	Sugar (and other) transporter
isotig01289	PF07690.10	4.3e-16	58.3	17.5	6.4e-16	57.7	12.1	1.3	1	1	0	1	1	1	1	Major Facilitator Superfamily
isotig01289	PF07690.10	7.2e-09	34.5	14.4	9.5e-09	34.1	10	1.1	1	0	0	1	1	1	1	Major Facilitator Superfamily
isotig01289	PF00083.18	3.4e-47	160.7	12.3	4.6e-47	160.3	8.5	1.1	1	0	0	1	1	1	1	Sugar (and other) transporter
isotig01289	PF00083.18	6.7e-38	130.1	20.4	7.3e-38	130	14.1	1	1	0	0	1	1	1	1	Sugar (and other) transporter
isotig01290	PF07690.10	7.2e-09	34.5	14.4	9.5e-09	34.1	10	1.1	1	0	0	1	1	1	1	Major Facilitator Superfamily
isotig01290	PF07690.10	4.3e-16	58.3	17.5	6.4e-16	57.7	12.1	1.3	1	1	0	1	1	1	1	Major Facilitator Superfamily
isotig01290	PF00083.18	6.7e-38	130.1	20.4	7.3e-38	130	14.1	1	1	0	0	1	1	1	1	Sugar (and other) transporter
isotig01290	PF00083.18	3.4e-47	160.7	12.3	4.6e-47	160.3	8.5	1.1	1	0	0	1	1	1	1	Sugar (and other) transporter
isotig01291	PF07690.10	7.2e-09	34.5	14.4	9.5e-09	34.1	10	1.1	1	0	0	1	1	1	1	Major Facilitator Superfamily
isotig01291	PF07690.10	4.3e-16	58.3	17.5	6.4e-16	57.7	12.1	1.3	1	1	0	1	1	1	1	Major Facilitator Superfamily
isotig01291	PF00083.18	6.7e-38	130.1	20.4	7.3e-38	130	14.1	1	1	0	0	1	1	1	1	Sugar (and other) transporter
isotig01291	PF00083.18	3.4e-47	160.7	12.3	4.6e-47	160.3	8.5	1.1	1	0	0	1	1	1	1	Sugar (and other) transporter
isotig01292	PF07690.10	7.2e-09	34.5	14.4	9.5e-09	34.1	10	1.1	1	0	0	1	1	1	1	Major Facilitator Superfamily
isotig01292	PF07690.10	4.3e-16	58.3	17.5	6.4e-16	57.7	12.1	1.3	1	1	0	1	1	1	1	Major Facilitator Superfamily
isotig01292	PF00083.18	6.7e-38	130.1	20.4	7.3e-38	130	14.1	1	1	0	0	1	1	1	1	Sugar (and other) transporter
isotig01292	PF00083.18	3.4e-47	160.7	12.3	4.6e-47	160.3	8.5	1.1	1	0	0	1	1	1	1	Sugar (and other) transporter
isotig01293	PF07690.10	4.3e-16	58.3	17.5	6.4e-16	57.7	12.1	1.3	1	1	0	1	1	1	1	Major Facilitator Superfamily
isotig01293	PF07690.10	7.2e-09	34.5	14.4	9.5e-09	34.1	10	1.1	1	0	0	1	1	1	1	Major Facilitator Superfamily
isotig01293	PF00083.18	3.4e-47	160.7	12.3	4.6e-47	160.3	8.5	1.1	1	0	0	1	1	1	1	Sugar (and other) transporter
isotig01293	PF00083.18	6.7e-38	130.1	20.4	7.3e-38	130	14.1	1	1	0	0	1	1	1	1	Sugar (and other) transporter
isotig01294	PF07690.10	1.7e-09	36.6	17	2.4e-09	36.1	11.8	1.2	1	0	0	1	1	1	1	Major Facilitator Superfamily
isotig01294	PF07690.10	5.1e-17	61.4	16.3	8.6e-17	60.6	11.4	1.3	1	1	0	1	1	1	1	Major Facilitator Superfamily
isotig01294	PF00083.18	8.9e-40	136.3	20.7	9.9e-40	136.1	14.3	1	1	0	0	1	1	1	1	Sugar (and other) transporter
isotig01294	PF00083.18	2.4e-55	187.6	13.6	3.2e-55	187.2	9.5	1.1	1	0	0	1	1	1	1	Sugar (and other) transporter
isotig01295	PF07690.10	7.2e-09	34.5	14.4	9.5e-09	34.1	10	1.1	1	0	0	1	1	1	1	Major Facilitator Superfamily
isotig01295	PF07690.10	4.3e-16	58.3	17.5	6.4e-16	57.7	12.1	1.3	1	1	0	1	1	1	1	Major Facilitator Superfamily
isotig01295	PF00083.18	6.7e-38	130.1	20.4	7.3e-38	130	14.1	1	1	0	0	1	1	1	1	Sugar (and other) transporter
isotig01295	PF00083.18	3.4e-47	160.7	12.3	4.6e-47	160.3	8.5	1.1	1	0	0	1	1	1	1	Sugar (and other) transporter
isotig01296	PF07690.10	7.2e-09	34.5	14.4	9.5e-09	34.1	10	1.1	1	0	0	1	1	1	1	Major Facilitator Superfamily
isotig01296	PF07690.10	4.3e-16	58.3	17.5	6.4e-16	57.7	12.1	1.3	1	1	0	1	1	1	1	Major Facilitator Superfamily
isotig01296	PF00083.18	6.7e-38	130.1	20.4	7.3e-38	130	14.1	1	1	0	0	1	1	1	1	Sugar (and other) transporter
isotig01296	PF00083.18	3.4e-47	160.7	12.3	4.6e-47	160.3	8.5	1.1	1	0	0	1	1	1	1	Sugar (and other) transporter
isotig01297	PF07690.10	7.2e-09	34.5	14.4	9.5e-09	34.1	10	1.1	1	0	0	1	1	1	1	Major Facilitator Superfamily
isotig01297	PF07690.10	4.3e-16	58.3	17.5	6.4e-16	57.7	12.1	1.3	1	1	0	1	1	1	1	Major Facilitator Superfamily
isotig01297	PF00083.18	6.7e-38	130.1	20.4	7.3e-38	130	14.1	1	1	0	0	1	1	1	1	Sugar (and other) transporter
isotig01297	PF00083.18	3.4e-47	160.7	12.3	4.6e-47	160.3	8.5	1.1	1	0	0	1	1	1	1	Sugar (and other) transporter
isotig01298	PF07690.10	7.2e-09	34.5	14.4	9.5e-09	34.1	10	1.1	1	0	0	1	1	1	1	Major Facilitator Superfamily
isotig01298	PF07690.10	4.3e-16	58.3	17.5	6.4e-16	57.7	12.1	1.3	1	1	0	1	1	1	1	Major Facilitator Superfamily
isotig01298	PF00083.18	6.7e-38	130.1	20.4	7.3e-38	130	14.1	1	1	0	0	1	1	1	1	Sugar (and other) transporter
isotig01298	PF00083.18	3.4e-47	160.7	12.3	4.6e-47	160.3	8.5	1.1	1	0	0	1	1	1	1	Sugar (and other) transporter
isotig01299	PF07690.10	4.3e-16	58.3	17.5	6.4e-16	57.7	12.1	1.3	1	1	0	1	1	1	1	Major Facilitator Superfamily
isotig01299	PF07690.10	7.2e-09	34.5	14.4	9.5e-09	34.1	10	1.1	1	0	0	1	1	1	1	Major Facilitator Superfamily
isotig01299	PF00083.18	3.4e-47	160.7	12.3	4.6e-47	160.3	8.5	1.1	1	0	0	1	1	1	1	Sugar (and other) transporter
isotig01299	PF00083.18	6.7e-38	130.1	20.4	7.3e-38	130	14.1	1	1	0	0	1	1	1	1	Sugar (and other) transporter
isotig01300	PF07690.10	4.3e-16	58.3	17.5	6.4e-16	57.7	12.1	1.3	1	1	0	1	1	1	1	Major Facilitator Superfamily
isotig01300	PF07690.10	7.2e-09	34.5	14.4	9.5e-09	34.1	10	1.1	1	0	0	1	1	1	1	Major Facilitator Superfamily
isotig01300	PF00083.18	3.4e-47	160.7	12.3	4.6e-47	160.3	8.5	1.1	1	0	0	1	1	1	1	Sugar (and other) transporter
isotig01300	PF00083.18	6.7e-38	130.1	20.4	7.3e-38	130	14.1	1	1	0	0	1	1	1	1	Sugar (and other) transporter
isotig01301	PF07690.10	1.7e-09	36.6	17	2.4e-09	36.1	11.8	1.2	1	0	0	1	1	1	1	Major Facilitator Superfamily
isotig01301	PF07690.10	5.1e-17	61.4	16.3	8.6e-17	60.6	11.4	1.3	1	1	0	1	1	1	1	Major Facilitator Superfamily
isotig01301	PF00083.18	8.9e-40	136.3	20.7	9.9e-40	136.1	14.3	1	1	0	0	1	1	1	1	Sugar (and other) transporter
isotig01301	PF00083.18	2.4e-55	187.6	13.6	3.2e-55	187.2	9.5	1.1	1	0	0	1	1	1	1	Sugar (and other) transporter
isotig01302	PF07690.10	4.3e-16	58.3	17.5	6.4e-16	57.7	12.1	1.3	1	1	0	1	1	1	1	Major Facilitator Superfamily
isotig01302	PF07690.10	7.2e-09	34.5	14.4	9.5e-09	34.1	10	1.1	1	0	0	1	1	1	1	Major Facilitator Superfamily
isotig01302	PF00083.18	3.4e-47	160.7	12.3	4.6e-47	160.3	8.5	1.1	1	0	0	1	1	1	1	Sugar (and other) transporter
isotig01302	PF00083.18	6.7e-38	130.1	20.4	7.3e-38	130	14.1	1	1	0	0	1	1	1	1	Sugar (and other) transporter
isotig01303	PF07690.10	4.3e-16	58.3	17.5	6.4e-16	57.7	12.1	1.3	1	1	0	1	1	1	1	Major Facilitator Superfamily
isotig01303	PF07690.10	7.2e-09	34.5	14.4	9.5e-09	34.1	10	1.1	1	0	0	1	1	1	1	Major Facilitator Superfamily
isotig01303	PF00083.18	3.4e-47	160.7	12.3	4.6e-47	160.3	8.5	1.1	1	0	0	1	1	1	1	Sugar (and other) transporter
isotig01303	PF00083.18	6.7e-38	130.1	20.4	7.3e-38	130	14.1	1	1	0	0	1	1	1	1	Sugar (and other) transporter
isotig01304	PF07690.10	7.2e-09	34.5	14.4	9.5e-09	34.1	10	1.1	1	0	0	1	1	1	1	Major Facilitator Superfamily
isotig01304	PF07690.10	4.3e-16	58.3	17.5	6.4e-16	57.7	12.1	1.3	1	1	0	1	1	1	1	Major Facilitator Superfamily
isotig01304	PF00083.18	6.7e-38	130.1	20.4	7.3e-38	130	14.1	1	1	0	0	1	1	1	1	Sugar (and other) transporter
isotig01304	PF00083.18	3.4e-47	160.7	12.3	4.6e-47	160.3	8.5	1.1	1	0	0	1	1	1	1	Sugar (and other) transporter
isotig01305	PF07690.10	4.3e-16	58.3	17.5	6.4e-16	57.7	12.1	1.3	1	1	0	1	1	1	1	Major Facilitator Superfamily
isotig01305	PF07690.10	7.2e-09	34.5	14.4	9.5e-09	34.1	10	1.1	1	0	0	1	1	1	1	Major Facilitator Superfamily
isotig01305	PF00083.18	3.4e-47	160.7	12.3	4.6e-47	160.3	8.5	1.1	1	0	0	1	1	1	1	Sugar (and other) transporter
isotig01305	PF00083.18	6.7e-38	130.1	20.4	7.3e-38	130	14.1	1	1	0	0	1	1	1	1	Sugar (and other) transporter
isotig01306	PF07690.10	1.7e-09	36.6	17	2.4e-09	36.1	11.8	1.2	1	0	0	1	1	1	1	Major Facilitator Superfamily
isotig01306	PF07690.10	5.1e-17	61.4	16.3	8.6e-17	60.6	11.4	1.3	1	1	0	1	1	1	1	Major Facilitator Superfamily
isotig01306	PF00083.18	8.9e-40	136.3	20.7	9.9e-40	136.1	14.3	1	1	0	0	1	1	1	1	Sugar (and other) transporter
isotig01306	PF00083.18	2.4e-55	187.6	13.6	3.2e-55	187.2	9.5	1.1	1	0	0	1	1	1	1	Sugar (and other) transporter
isotig01307	PF07690.10	7.2e-09	34.5	14.4	9.5e-09	34.1	10	1.1	1	0	0	1	1	1	1	Major Facilitator Superfamily
isotig01307	PF07690.10	4.3e-16	58.3	17.5	6.4e-16	57.7	12.1	1.3	1	1	0	1	1	1	1	Major Facilitator Superfamily
isotig01307	PF00083.18	6.7e-38	130.1	20.4	7.3e-38	130	14.1	1	1	0	0	1	1	1	1	Sugar (and other) transporter
isotig01307	PF00083.18	3.4e-47	160.7	12.3	4.6e-47	160.3	8.5	1.1	1	0	0	1	1	1	1	Sugar (and other) transporter
isotig01308	PF07690.10	4.3e-16	58.3	17.5	6.4e-16	57.7	12.1	1.3	1	1	0	1	1	1	1	Major Facilitator Superfamily
isotig01308	PF07690.10	7.2e-09	34.5	14.4	9.5e-09	34.1	10	1.1	1	0	0	1	1	1	1	Major Facilitator Superfamily
isotig01308	PF00083.18	3.4e-47	160.7	12.3	4.6e-47	160.3	8.5	1.1	1	0	0	1	1	1	1	Sugar (and other) transporter
isotig01308	PF00083.18	6.7e-38	130.1	20.4	7.3e-38	130	14.1	1	1	0	0	1	1	1	1	Sugar (and other) transporter
isotig01309	PF07690.10	5.1e-17	61.4	16.3	8.6e-17	60.6	11.4	1.3	1	1	0	1	1	1	1	Major Facilitator Superfamily
isotig01309	PF07690.10	1.7e-09	36.6	17	2.4e-09	36.1	11.8	1.2	1	0	0	1	1	1	1	Major Facilitator Superfamily
isotig01309	PF00083.18	2.4e-55	187.6	13.6	3.2e-55	187.2	9.5	1.1	1	0	0	1	1	1	1	Sugar (and other) transporter
isotig01309	PF00083.18	8.9e-40	136.3	20.7	9.9e-40	136.1	14.3	1	1	0	0	1	1	1	1	Sugar (and other) transporter
isotig01310	PF07690.10	1.7e-09	36.6	17	2.4e-09	36.1	11.8	1.2	1	0	0	1	1	1	1	Major Facilitator Superfamily
isotig01310	PF07690.10	5.1e-17	61.4	16.3	8.6e-17	60.6	11.4	1.3	1	1	0	1	1	1	1	Major Facilitator Superfamily
isotig01310	PF00083.18	8.9e-40	136.3	20.7	9.9e-40	136.1	14.3	1	1	0	0	1	1	1	1	Sugar (and other) transporter
isotig01310	PF00083.18	2.4e-55	187.6	13.6	3.2e-55	187.2	9.5	1.1	1	0	0	1	1	1	1	Sugar (and other) transporter
isotig01311	PF07690.10	7.2e-09	34.5	14.4	9.5e-09	34.1	10	1.1	1	0	0	1	1	1	1	Major Facilitator Superfamily
isotig01311	PF07690.10	4.3e-16	58.3	17.5	6.4e-16	57.7	12.1	1.3	1	1	0	1	1	1	1	Major Facilitator Superfamily
isotig01311	PF00083.18	6.7e-38	130.1	20.4	7.3e-38	130	14.1	1	1	0	0	1	1	1	1	Sugar (and other) transporter
isotig01311	PF00083.18	3.4e-47	160.7	12.3	4.6e-47	160.3	8.5	1.1	1	0	0	1	1	1	1	Sugar (and other) transporter
isotig01312	PF07690.10	4.3e-16	58.3	17.5	6.4e-16	57.7	12.1	1.3	1	1	0	1	1	1	1	Major Facilitator Superfamily
isotig01312	PF07690.10	7.2e-09	34.5	14.4	9.5e-09	34.1	10	1.1	1	0	0	1	1	1	1	Major Facilitator Superfamily
isotig01312	PF00083.18	3.4e-47	160.7	12.3	4.6e-47	160.3	8.5	1.1	1	0	0	1	1	1	1	Sugar (and other) transporter
isotig01312	PF00083.18	6.7e-38	130.1	20.4	7.3e-38	130	14.1	1	1	0	0	1	1	1	1	Sugar (and other) transporter
isotig01313	PF07690.10	1.7e-09	36.6	17	2.4e-09	36.1	11.8	1.2	1	0	0	1	1	1	1	Major Facilitator Superfamily
isotig01313	PF07690.10	5.1e-17	61.4	16.3	8.6e-17	60.6	11.4	1.3	1	1	0	1	1	1	1	Major Facilitator Superfamily
isotig01313	PF00083.18	8.9e-40	136.3	20.7	9.9e-40	136.1	14.3	1	1	0	0	1	1	1	1	Sugar (and other) transporter
isotig01313	PF00083.18	2.4e-55	187.6	13.6	3.2e-55	187.2	9.5	1.1	1	0	0	1	1	1	1	Sugar (and other) transporter
isotig01314	PF07690.10	4.3e-16	58.3	17.5	6.4e-16	57.7	12.1	1.3	1	1	0	1	1	1	1	Major Facilitator Superfamily
isotig01314	PF07690.10	7.2e-09	34.5	14.4	9.5e-09	34.1	10	1.1	1	0	0	1	1	1	1	Major Facilitator Superfamily
isotig01314	PF00083.18	3.4e-47	160.7	12.3	4.6e-47	160.3	8.5	1.1	1	0	0	1	1	1	1	Sugar (and other) transporter
isotig01314	PF00083.18	6.7e-38	130.1	20.4	7.3e-38	130	14.1	1	1	0	0	1	1	1	1	Sugar (and other) transporter
isotig01315	PF07690.10	5.1e-17	61.4	16.3	8.6e-17	60.6	11.4	1.3	1	1	0	1	1	1	1	Major Facilitator Superfamily
isotig01315	PF07690.10	1.7e-09	36.6	17	2.4e-09	36.1	11.8	1.2	1	0	0	1	1	1	1	Major Facilitator Superfamily
isotig01315	PF00083.18	2.4e-55	187.6	13.6	3.2e-55	187.2	9.5	1.1	1	0	0	1	1	1	1	Sugar (and other) transporter
isotig01315	PF00083.18	8.9e-40	136.3	20.7	9.9e-40	136.1	14.3	1	1	0	0	1	1	1	1	Sugar (and other) transporter
isotig01316	PF07690.10	7.2e-09	34.5	14.4	9.5e-09	34.1	10	1.1	1	0	0	1	1	1	1	Major Facilitator Superfamily
isotig01316	PF07690.10	4.3e-16	58.3	17.5	6.4e-16	57.7	12.1	1.3	1	1	0	1	1	1	1	Major Facilitator Superfamily
isotig01316	PF00083.18	6.7e-38	130.1	20.4	7.3e-38	130	14.1	1	1	0	0	1	1	1	1	Sugar (and other) transporter
isotig01316	PF00083.18	3.4e-47	160.7	12.3	4.6e-47	160.3	8.5	1.1	1	0	0	1	1	1	1	Sugar (and other) transporter
isotig01317	PF07690.10	4.3e-16	58.3	17.5	6.4e-16	57.7	12.1	1.3	1	1	0	1	1	1	1	Major Facilitator Superfamily
isotig01317	PF07690.10	7.2e-09	34.5	14.4	9.5e-09	34.1	10	1.1	1	0	0	1	1	1	1	Major Facilitator Superfamily
isotig01317	PF00083.18	3.4e-47	160.7	12.3	4.6e-47	160.3	8.5	1.1	1	0	0	1	1	1	1	Sugar (and other) transporter
isotig01317	PF00083.18	6.7e-38	130.1	20.4	7.3e-38	130	14.1	1	1	0	0	1	1	1	1	Sugar (and other) transporter
isotig01318	PF07690.10	7.2e-09	34.5	14.4	9.5e-09	34.1	10	1.1	1	0	0	1	1	1	1	Major Facilitator Superfamily
isotig01318	PF07690.10	4.3e-16	58.3	17.5	6.4e-16	57.7	12.1	1.3	1	1	0	1	1	1	1	Major Facilitator Superfamily
isotig01318	PF00083.18	6.7e-38	130.1	20.4	7.3e-38	130	14.1	1	1	0	0	1	1	1	1	Sugar (and other) transporter
isotig01318	PF00083.18	3.4e-47	160.7	12.3	4.6e-47	160.3	8.5	1.1	1	0	0	1	1	1	1	Sugar (and other) transporter
isotig01319	PF07690.10	7.2e-09	34.5	14.4	9.5e-09	34.1	10	1.1	1	0	0	1	1	1	1	Major Facilitator Superfamily
isotig01319	PF07690.10	4.3e-16	58.3	17.5	6.4e-16	57.7	12.1	1.3	1	1	0	1	1	1	1	Major Facilitator Superfamily
isotig01319	PF00083.18	6.7e-38	130.1	20.4	7.3e-38	130	14.1	1	1	0	0	1	1	1	1	Sugar (and other) transporter
isotig01319	PF00083.18	3.4e-47	160.7	12.3	4.6e-47	160.3	8.5	1.1	1	0	0	1	1	1	1	Sugar (and other) transporter
isotig01320	PF07690.10	5.1e-17	61.4	16.3	8.6e-17	60.6	11.4	1.3	1	1	0	1	1	1	1	Major Facilitator Superfamily
isotig01320	PF07690.10	1.7e-09	36.6	17	2.4e-09	36.1	11.8	1.2	1	0	0	1	1	1	1	Major Facilitator Superfamily
isotig01320	PF00083.18	2.4e-55	187.6	13.6	3.2e-55	187.2	9.5	1.1	1	0	0	1	1	1	1	Sugar (and other) transporter
isotig01320	PF00083.18	8.9e-40	136.3	20.7	9.9e-40	136.1	14.3	1	1	0	0	1	1	1	1	Sugar (and other) transporter
isotig01321	PF07690.10	7.2e-09	34.5	14.4	9.5e-09	34.1	10	1.1	1	0	0	1	1	1	1	Major Facilitator Superfamily
isotig01321	PF07690.10	4.3e-16	58.3	17.5	6.4e-16	57.7	12.1	1.3	1	1	0	1	1	1	1	Major Facilitator Superfamily
isotig01321	PF00083.18	6.7e-38	130.1	20.4	7.3e-38	130	14.1	1	1	0	0	1	1	1	1	Sugar (and other) transporter
isotig01321	PF00083.18	3.4e-47	160.7	12.3	4.6e-47	160.3	8.5	1.1	1	0	0	1	1	1	1	Sugar (and other) transporter
isotig01322	PF07690.10	5.1e-17	61.4	16.3	8.6e-17	60.6	11.4	1.3	1	1	0	1	1	1	1	Major Facilitator Superfamily
isotig01322	PF07690.10	1.7e-09	36.6	17	2.4e-09	36.1	11.8	1.2	1	0	0	1	1	1	1	Major Facilitator Superfamily
isotig01322	PF00083.18	2.4e-55	187.6	13.6	3.2e-55	187.2	9.5	1.1	1	0	0	1	1	1	1	Sugar (and other) transporter
isotig01322	PF00083.18	8.9e-40	136.3	20.7	9.9e-40	136.1	14.3	1	1	0	0	1	1	1	1	Sugar (and other) transporter
isotig01323	PF07690.10	5.1e-17	61.4	16.3	8.6e-17	60.6	11.4	1.3	1	1	0	1	1	1	1	Major Facilitator Superfamily
isotig01323	PF07690.10	1.7e-09	36.6	17	2.4e-09	36.1	11.8	1.2	1	0	0	1	1	1	1	Major Facilitator Superfamily
isotig01323	PF00083.18	2.4e-55	187.6	13.6	3.2e-55	187.2	9.5	1.1	1	0	0	1	1	1	1	Sugar (and other) transporter
isotig01323	PF00083.18	8.9e-40	136.3	20.7	9.9e-40	136.1	14.3	1	1	0	0	1	1	1	1	Sugar (and other) transporter
isotig01324	PF07690.10	4.3e-16	58.3	17.5	6.4e-16	57.7	12.1	1.3	1	1	0	1	1	1	1	Major Facilitator Superfamily
isotig01324	PF07690.10	7.2e-09	34.5	14.4	9.5e-09	34.1	10	1.1	1	0	0	1	1	1	1	Major Facilitator Superfamily
isotig01324	PF00083.18	3.4e-47	160.7	12.3	4.6e-47	160.3	8.5	1.1	1	0	0	1	1	1	1	Sugar (and other) transporter
isotig01324	PF00083.18	6.7e-38	130.1	20.4	7.3e-38	130	14.1	1	1	0	0	1	1	1	1	Sugar (and other) transporter
isotig01325	PF07690.10	4.3e-16	58.3	17.5	6.4e-16	57.7	12.1	1.3	1	1	0	1	1	1	1	Major Facilitator Superfamily
isotig01325	PF07690.10	7.2e-09	34.5	14.4	9.5e-09	34.1	10	1.1	1	0	0	1	1	1	1	Major Facilitator Superfamily
isotig01325	PF00083.18	3.4e-47	160.7	12.3	4.6e-47	160.3	8.5	1.1	1	0	0	1	1	1	1	Sugar (and other) transporter
isotig01325	PF00083.18	6.7e-38	130.1	20.4	7.3e-38	130	14.1	1	1	0	0	1	1	1	1	Sugar (and other) transporter
isotig01326	PF07690.10	1.7e-09	36.6	17	2.4e-09	36.1	11.8	1.2	1	0	0	1	1	1	1	Major Facilitator Superfamily
isotig01326	PF07690.10	5.1e-17	61.4	16.3	8.6e-17	60.6	11.4	1.3	1	1	0	1	1	1	1	Major Facilitator Superfamily
isotig01326	PF00083.18	8.9e-40	136.3	20.7	9.9e-40	136.1	14.3	1	1	0	0	1	1	1	1	Sugar (and other) transporter
isotig01326	PF00083.18	2.4e-55	187.6	13.6	3.2e-55	187.2	9.5	1.1	1	0	0	1	1	1	1	Sugar (and other) transporter
isotig01327	PF07690.10	7.2e-09	34.5	14.4	9.5e-09	34.1	10	1.1	1	0	0	1	1	1	1	Major Facilitator Superfamily
isotig01327	PF07690.10	4.3e-16	58.3	17.5	6.4e-16	57.7	12.1	1.3	1	1	0	1	1	1	1	Major Facilitator Superfamily
isotig01327	PF00083.18	6.7e-38	130.1	20.4	7.3e-38	130	14.1	1	1	0	0	1	1	1	1	Sugar (and other) transporter
isotig01327	PF00083.18	3.4e-47	160.7	12.3	4.6e-47	160.3	8.5	1.1	1	0	0	1	1	1	1	Sugar (and other) transporter
isotig01328	PF07690.10	7.2e-09	34.5	14.4	9.5e-09	34.1	10	1.1	1	0	0	1	1	1	1	Major Facilitator Superfamily
isotig01328	PF07690.10	4.3e-16	58.3	17.5	6.4e-16	57.7	12.1	1.3	1	1	0	1	1	1	1	Major Facilitator Superfamily
isotig01328	PF00083.18	6.7e-38	130.1	20.4	7.3e-38	130	14.1	1	1	0	0	1	1	1	1	Sugar (and other) transporter
isotig01328	PF00083.18	3.4e-47	160.7	12.3	4.6e-47	160.3	8.5	1.1	1	0	0	1	1	1	1	Sugar (and other) transporter
isotig01329	PF07690.10	7.2e-09	34.5	14.4	9.5e-09	34.1	10	1.1	1	0	0	1	1	1	1	Major Facilitator Superfamily
isotig01329	PF07690.10	4.3e-16	58.3	17.5	6.4e-16	57.7	12.1	1.3	1	1	0	1	1	1	1	Major Facilitator Superfamily
isotig01329	PF00083.18	6.7e-38	130.1	20.4	7.3e-38	130	14.1	1	1	0	0	1	1	1	1	Sugar (and other) transporter
isotig01329	PF00083.18	3.4e-47	160.7	12.3	4.6e-47	160.3	8.5	1.1	1	0	0	1	1	1	1	Sugar (and other) transporter
isotig01330	PF07690.10	4.3e-16	58.3	17.5	6.4e-16	57.7	12.1	1.3	1	1	0	1	1	1	1	Major Facilitator Superfamily
isotig01330	PF07690.10	7.2e-09	34.5	14.4	9.5e-09	34.1	10	1.1	1	0	0	1	1	1	1	Major Facilitator Superfamily
isotig01330	PF00083.18	3.4e-47	160.7	12.3	4.6e-47	160.3	8.5	1.1	1	0	0	1	1	1	1	Sugar (and other) transporter
isotig01330	PF00083.18	6.7e-38	130.1	20.4	7.3e-38	130	14.1	1	1	0	0	1	1	1	1	Sugar (and other) transporter
isotig01331	PF07690.10	4.3e-16	58.3	17.5	6.4e-16	57.7	12.1	1.3	1	1	0	1	1	1	1	Major Facilitator Superfamily
isotig01331	PF07690.10	7.2e-09	34.5	14.4	9.5e-09	34.1	10	1.1	1	0	0	1	1	1	1	Major Facilitator Superfamily
isotig01331	PF00083.18	3.4e-47	160.7	12.3	4.6e-47	160.3	8.5	1.1	1	0	0	1	1	1	1	Sugar (and other) transporter
isotig01331	PF00083.18	6.7e-38	130.1	20.4	7.3e-38	130	14.1	1	1	0	0	1	1	1	1	Sugar (and other) transporter
isotig01332	PF07690.10	1.7e-09	36.6	17	2.4e-09	36.1	11.8	1.2	1	0	0	1	1	1	1	Major Facilitator Superfamily
isotig01332	PF07690.10	5.1e-17	61.4	16.3	8.6e-17	60.6	11.4	1.3	1	1	0	1	1	1	1	Major Facilitator Superfamily
isotig01332	PF00083.18	8.9e-40	136.3	20.7	9.9e-40	136.1	14.3	1	1	0	0	1	1	1	1	Sugar (and other) transporter
isotig01332	PF00083.18	2.4e-55	187.6	13.6	3.2e-55	187.2	9.5	1.1	1	0	0	1	1	1	1	Sugar (and other) transporter
isotig01333	PF07690.10	5.1e-17	61.4	16.3	8.6e-17	60.6	11.4	1.3	1	1	0	1	1	1	1	Major Facilitator Superfamily
isotig01333	PF07690.10	1.7e-09	36.6	17	2.4e-09	36.1	11.8	1.2	1	0	0	1	1	1	1	Major Facilitator Superfamily
isotig01333	PF00083.18	2.4e-55	187.6	13.6	3.2e-55	187.2	9.5	1.1	1	0	0	1	1	1	1	Sugar (and other) transporter
isotig01333	PF00083.18	8.9e-40	136.3	20.7	9.9e-40	136.1	14.3	1	1	0	0	1	1	1	1	Sugar (and other) transporter
isotig01334	PF07690.10	7.2e-09	34.5	14.4	9.5e-09	34.1	10	1.1	1	0	0	1	1	1	1	Major Facilitator Superfamily
isotig01334	PF07690.10	4.3e-16	58.3	17.5	6.4e-16	57.7	12.1	1.3	1	1	0	1	1	1	1	Major Facilitator Superfamily
isotig01334	PF00083.18	6.7e-38	130.1	20.4	7.3e-38	130	14.1	1	1	0	0	1	1	1	1	Sugar (and other) transporter
isotig01334	PF00083.18	3.4e-47	160.7	12.3	4.6e-47	160.3	8.5	1.1	1	0	0	1	1	1	1	Sugar (and other) transporter
isotig01335	PF07690.10	5.1e-17	61.4	16.3	8.6e-17	60.6	11.4	1.3	1	1	0	1	1	1	1	Major Facilitator Superfamily
isotig01335	PF07690.10	1.7e-09	36.6	17	2.4e-09	36.1	11.8	1.2	1	0	0	1	1	1	1	Major Facilitator Superfamily
isotig01335	PF00083.18	2.4e-55	187.6	13.6	3.2e-55	187.2	9.5	1.1	1	0	0	1	1	1	1	Sugar (and other) transporter
isotig01335	PF00083.18	8.9e-40	136.3	20.7	9.9e-40	136.1	14.3	1	1	0	0	1	1	1	1	Sugar (and other) transporter
isotig01336	PF07690.10	7.2e-09	34.5	14.4	9.5e-09	34.1	10	1.1	1	0	0	1	1	1	1	Major Facilitator Superfamily
isotig01336	PF07690.10	4.3e-16	58.3	17.5	6.4e-16	57.7	12.1	1.3	1	1	0	1	1	1	1	Major Facilitator Superfamily
isotig01336	PF00083.18	6.7e-38	130.1	20.4	7.3e-38	130	14.1	1	1	0	0	1	1	1	1	Sugar (and other) transporter
isotig01336	PF00083.18	3.4e-47	160.7	12.3	4.6e-47	160.3	8.5	1.1	1	0	0	1	1	1	1	Sugar (and other) transporter
isotig01337	PF07690.10	5.1e-17	61.4	16.3	8.6e-17	60.6	11.4	1.3	1	1	0	1	1	1	1	Major Facilitator Superfamily
isotig01337	PF07690.10	1.7e-09	36.6	17	2.4e-09	36.1	11.8	1.2	1	0	0	1	1	1	1	Major Facilitator Superfamily
isotig01337	PF00083.18	2.4e-55	187.6	13.6	3.2e-55	187.2	9.5	1.1	1	0	0	1	1	1	1	Sugar (and other) transporter
isotig01337	PF00083.18	8.9e-40	136.3	20.7	9.9e-40	136.1	14.3	1	1	0	0	1	1	1	1	Sugar (and other) transporter
isotig01338	PF07690.10	5.1e-17	61.4	16.3	8.6e-17	60.6	11.4	1.3	1	1	0	1	1	1	1	Major Facilitator Superfamily
isotig01338	PF07690.10	1.7e-09	36.6	17	2.4e-09	36.1	11.8	1.2	1	0	0	1	1	1	1	Major Facilitator Superfamily
isotig01338	PF00083.18	2.4e-55	187.6	13.6	3.2e-55	187.2	9.5	1.1	1	0	0	1	1	1	1	Sugar (and other) transporter
isotig01338	PF00083.18	8.9e-40	136.3	20.7	9.9e-40	136.1	14.3	1	1	0	0	1	1	1	1	Sugar (and other) transporter
isotig01339	PF07690.10	1.7e-09	36.6	17	2.4e-09	36.1	11.8	1.2	1	0	0	1	1	1	1	Major Facilitator Superfamily
isotig01339	PF07690.10	5.1e-17	61.4	16.3	8.6e-17	60.6	11.4	1.3	1	1	0	1	1	1	1	Major Facilitator Superfamily
isotig01339	PF00083.18	8.9e-40	136.3	20.7	9.9e-40	136.1	14.3	1	1	0	0	1	1	1	1	Sugar (and other) transporter
isotig01339	PF00083.18	2.4e-55	187.6	13.6	3.2e-55	187.2	9.5	1.1	1	0	0	1	1	1	1	Sugar (and other) transporter
isotig01340	PF07690.10	4.3e-16	58.3	17.5	6.4e-16	57.7	12.1	1.3	1	1	0	1	1	1	1	Major Facilitator Superfamily
isotig01340	PF07690.10	7.2e-09	34.5	14.4	9.5e-09	34.1	10	1.1	1	0	0	1	1	1	1	Major Facilitator Superfamily
isotig01340	PF00083.18	3.4e-47	160.7	12.3	4.6e-47	160.3	8.5	1.1	1	0	0	1	1	1	1	Sugar (and other) transporter
isotig01340	PF00083.18	6.7e-38	130.1	20.4	7.3e-38	130	14.1	1	1	0	0	1	1	1	1	Sugar (and other) transporter
isotig01341	PF07690.10	5.1e-17	61.4	16.3	8.6e-17	60.6	11.4	1.3	1	1	0	1	1	1	1	Major Facilitator Superfamily
isotig01341	PF07690.10	1.7e-09	36.6	17	2.4e-09	36.1	11.8	1.2	1	0	0	1	1	1	1	Major Facilitator Superfamily
isotig01341	PF00083.18	2.4e-55	187.6	13.6	3.2e-55	187.2	9.5	1.1	1	0	0	1	1	1	1	Sugar (and other) transporter
isotig01341	PF00083.18	8.9e-40	136.3	20.7	9.9e-40	136.1	14.3	1	1	0	0	1	1	1	1	Sugar (and other) transporter
isotig01342	PF07690.10	5.1e-17	61.4	16.3	8.6e-17	60.6	11.4	1.3	1	1	0	1	1	1	1	Major Facilitator Superfamily
isotig01342	PF07690.10	1.7e-09	36.6	17	2.4e-09	36.1	11.8	1.2	1	0	0	1	1	1	1	Major Facilitator Superfamily
isotig01342	PF00083.18	2.4e-55	187.6	13.6	3.2e-55	187.2	9.5	1.1	1	0	0	1	1	1	1	Sugar (and other) transporter
isotig01342	PF00083.18	8.9e-40	136.3	20.7	9.9e-40	136.1	14.3	1	1	0	0	1	1	1	1	Sugar (and other) transporter
isotig01343	PF07690.10	7.2e-09	34.5	14.4	9.5e-09	34.1	10	1.1	1	0	0	1	1	1	1	Major Facilitator Superfamily
isotig01343	PF07690.10	4.3e-16	58.3	17.5	6.4e-16	57.7	12.1	1.3	1	1	0	1	1	1	1	Major Facilitator Superfamily
isotig01343	PF00083.18	6.7e-38	130.1	20.4	7.3e-38	130	14.1	1	1	0	0	1	1	1	1	Sugar (and other) transporter
isotig01343	PF00083.18	3.4e-47	160.7	12.3	4.6e-47	160.3	8.5	1.1	1	0	0	1	1	1	1	Sugar (and other) transporter
isotig01344	PF07690.10	1.7e-09	36.6	17	2.4e-09	36.1	11.8	1.2	1	0	0	1	1	1	1	Major Facilitator Superfamily
isotig01344	PF07690.10	5.1e-17	61.4	16.3	8.6e-17	60.6	11.4	1.3	1	1	0	1	1	1	1	Major Facilitator Superfamily
isotig01344	PF00083.18	8.9e-40	136.3	20.7	9.9e-40	136.1	14.3	1	1	0	0	1	1	1	1	Sugar (and other) transporter
isotig01344	PF00083.18	2.4e-55	187.6	13.6	3.2e-55	187.2	9.5	1.1	1	0	0	1	1	1	1	Sugar (and other) transporter
isotig01345	PF07690.10	5.1e-17	61.4	16.3	8.6e-17	60.6	11.4	1.3	1	1	0	1	1	1	1	Major Facilitator Superfamily
isotig01345	PF07690.10	1.7e-09	36.6	17	2.4e-09	36.1	11.8	1.2	1	0	0	1	1	1	1	Major Facilitator Superfamily
isotig01345	PF00083.18	2.4e-55	187.6	13.6	3.2e-55	187.2	9.5	1.1	1	0	0	1	1	1	1	Sugar (and other) transporter
isotig01345	PF00083.18	8.9e-40	136.3	20.7	9.9e-40	136.1	14.3	1	1	0	0	1	1	1	1	Sugar (and other) transporter
isotig01346	PF07690.10	1.7e-23	82.6	19.5	2.7e-23	82	13.5	1.2	1	0	0	1	1	1	1	Major Facilitator Superfamily
isotig01346	PF00083.18	9.9e-48	162.5	24.9	1.2e-47	162.2	17.2	1.1	1	0	0	1	1	1	1	Sugar (and other) transporter
isotig01347	PF07690.10	1.7e-23	82.6	19.5	2.7e-23	82	13.5	1.2	1	0	0	1	1	1	1	Major Facilitator Superfamily
isotig01347	PF00083.18	9.9e-48	162.5	24.9	1.2e-47	162.2	17.2	1.1	1	0	0	1	1	1	1	Sugar (and other) transporter
isotig01348	PF07690.10	1.7e-23	82.6	19.5	2.7e-23	82	13.5	1.2	1	0	0	1	1	1	1	Major Facilitator Superfamily
isotig01348	PF00083.18	9.9e-48	162.5	24.9	1.2e-47	162.2	17.2	1.1	1	0	0	1	1	1	1	Sugar (and other) transporter
isotig01349	PF07690.10	1.7e-23	82.6	19.5	2.7e-23	82	13.5	1.2	1	0	0	1	1	1	1	Major Facilitator Superfamily
isotig01349	PF00083.18	9.9e-48	162.5	24.9	1.2e-47	162.2	17.2	1.1	1	0	0	1	1	1	1	Sugar (and other) transporter
isotig01350	PF07690.10	1.7e-23	82.6	19.5	2.7e-23	82	13.5	1.2	1	0	0	1	1	1	1	Major Facilitator Superfamily
isotig01350	PF00083.18	9.9e-48	162.5	24.9	1.2e-47	162.2	17.2	1.1	1	0	0	1	1	1	1	Sugar (and other) transporter
isotig01351	PF07690.10	1.7e-23	82.6	19.5	2.7e-23	82	13.5	1.2	1	0	0	1	1	1	1	Major Facilitator Superfamily
isotig01351	PF00083.18	9.9e-48	162.5	24.9	1.2e-47	162.2	17.2	1.1	1	0	0	1	1	1	1	Sugar (and other) transporter
isotig01352	PF07690.10	1.7e-23	82.6	19.5	2.7e-23	82	13.5	1.2	1	0	0	1	1	1	1	Major Facilitator Superfamily
isotig01352	PF00083.18	9.9e-48	162.5	24.9	1.2e-47	162.2	17.2	1.1	1	0	0	1	1	1	1	Sugar (and other) transporter
isotig01353	PF07690.10	1.7e-23	82.6	19.5	2.7e-23	82	13.5	1.2	1	0	0	1	1	1	1	Major Facilitator Superfamily
isotig01353	PF00083.18	9.9e-48	162.5	24.9	1.2e-47	162.2	17.2	1.1	1	0	0	1	1	1	1	Sugar (and other) transporter
isotig01354	PF07690.10	1.7e-23	82.6	19.5	2.7e-23	82	13.5	1.2	1	0	0	1	1	1	1	Major Facilitator Superfamily
isotig01354	PF00083.18	9.9e-48	162.5	24.9	1.2e-47	162.2	17.2	1.1	1	0	0	1	1	1	1	Sugar (and other) transporter
isotig01355	PF07690.10	1.7e-23	82.6	19.5	2.7e-23	82	13.5	1.2	1	0	0	1	1	1	1	Major Facilitator Superfamily
isotig01355	PF00083.18	9.9e-48	162.5	24.9	1.2e-47	162.2	17.2	1.1	1	0	0	1	1	1	1	Sugar (and other) transporter
isotig01356	PF07690.10	1.7e-23	82.6	19.5	2.7e-23	82	13.5	1.2	1	0	0	1	1	1	1	Major Facilitator Superfamily
isotig01356	PF00083.18	9.9e-48	162.5	24.9	1.2e-47	162.2	17.2	1.1	1	0	0	1	1	1	1	Sugar (and other) transporter
isotig01357	PF07690.10	1.7e-23	82.6	19.5	2.7e-23	82	13.5	1.2	1	0	0	1	1	1	1	Major Facilitator Superfamily
isotig01357	PF00083.18	9.9e-48	162.5	24.9	1.2e-47	162.2	17.2	1.1	1	0	0	1	1	1	1	Sugar (and other) transporter
isotig01358	PF07690.10	1.7e-23	82.6	19.5	2.7e-23	82	13.5	1.2	1	0	0	1	1	1	1	Major Facilitator Superfamily
isotig01358	PF00083.18	9.9e-48	162.5	24.9	1.2e-47	162.2	17.2	1.1	1	0	0	1	1	1	1	Sugar (and other) transporter
isotig01359	PF07690.10	1.7e-23	82.6	19.5	2.7e-23	82	13.5	1.2	1	0	0	1	1	1	1	Major Facilitator Superfamily
isotig01359	PF00083.18	9.9e-48	162.5	24.9	1.2e-47	162.2	17.2	1.1	1	0	0	1	1	1	1	Sugar (and other) transporter
isotig01360	PF07690.10	1.7e-23	82.6	19.5	2.7e-23	82	13.5	1.2	1	0	0	1	1	1	1	Major Facilitator Superfamily
isotig01360	PF00083.18	9.9e-48	162.5	24.9	1.2e-47	162.2	17.2	1.1	1	0	0	1	1	1	1	Sugar (and other) transporter
isotig01361	PF07690.10	1.7e-23	82.6	19.5	2.7e-23	82	13.5	1.2	1	0	0	1	1	1	1	Major Facilitator Superfamily
isotig01361	PF00083.18	9.9e-48	162.5	24.9	1.2e-47	162.2	17.2	1.1	1	0	0	1	1	1	1	Sugar (and other) transporter
isotig01362	PF07690.10	1.7e-23	82.6	19.5	2.7e-23	82	13.5	1.2	1	0	0	1	1	1	1	Major Facilitator Superfamily
isotig01362	PF00083.18	9.9e-48	162.5	24.9	1.2e-47	162.2	17.2	1.1	1	0	0	1	1	1	1	Sugar (and other) transporter
isotig01363	PF07690.10	1.7e-23	82.6	19.5	2.7e-23	82	13.5	1.2	1	0	0	1	1	1	1	Major Facilitator Superfamily
isotig01363	PF00083.18	9.9e-48	162.5	24.9	1.2e-47	162.2	17.2	1.1	1	0	0	1	1	1	1	Sugar (and other) transporter
isotig01364	PF07690.10	1.7e-23	82.6	19.5	2.7e-23	82	13.5	1.2	1	0	0	1	1	1	1	Major Facilitator Superfamily
isotig01364	PF00083.18	9.9e-48	162.5	24.9	1.2e-47	162.2	17.2	1.1	1	0	0	1	1	1	1	Sugar (and other) transporter
isotig01365	PF07690.10	1.7e-23	82.6	19.5	2.7e-23	82	13.5	1.2	1	0	0	1	1	1	1	Major Facilitator Superfamily
isotig01365	PF00083.18	9.9e-48	162.5	24.9	1.2e-47	162.2	17.2	1.1	1	0	0	1	1	1	1	Sugar (and other) transporter
isotig01366	PF07690.10	1.7e-23	82.6	19.5	2.7e-23	82	13.5	1.2	1	0	0	1	1	1	1	Major Facilitator Superfamily
isotig01366	PF00083.18	9.9e-48	162.5	24.9	1.2e-47	162.2	17.2	1.1	1	0	0	1	1	1	1	Sugar (and other) transporter
isotig01367	PF07690.10	1.7e-23	82.6	19.5	2.7e-23	82	13.5	1.2	1	0	0	1	1	1	1	Major Facilitator Superfamily
isotig01367	PF00083.18	9.9e-48	162.5	24.9	1.2e-47	162.2	17.2	1.1	1	0	0	1	1	1	1	Sugar (and other) transporter
isotig01368	PF07690.10	1.7e-23	82.6	19.5	2.7e-23	82	13.5	1.2	1	0	0	1	1	1	1	Major Facilitator Superfamily
isotig01368	PF00083.18	9.9e-48	162.5	24.9	1.2e-47	162.2	17.2	1.1	1	0	0	1	1	1	1	Sugar (and other) transporter
isotig01369	PF07690.10	1.7e-23	82.6	19.5	2.7e-23	82	13.5	1.2	1	0	0	1	1	1	1	Major Facilitator Superfamily
isotig01369	PF00083.18	9.9e-48	162.5	24.9	1.2e-47	162.2	17.2	1.1	1	0	0	1	1	1	1	Sugar (and other) transporter
isotig01370	PF07690.10	1.7e-23	82.6	19.5	2.7e-23	82	13.5	1.2	1	0	0	1	1	1	1	Major Facilitator Superfamily
isotig01370	PF00083.18	9.9e-48	162.5	24.9	1.2e-47	162.2	17.2	1.1	1	0	0	1	1	1	1	Sugar (and other) transporter
isotig01371	PF07690.10	1.7e-23	82.6	19.5	2.7e-23	82	13.5	1.2	1	0	0	1	1	1	1	Major Facilitator Superfamily
isotig01371	PF00083.18	9.9e-48	162.5	24.9	1.2e-47	162.2	17.2	1.1	1	0	0	1	1	1	1	Sugar (and other) transporter
isotig01372	PF07690.10	1.7e-23	82.6	19.5	2.7e-23	82	13.5	1.2	1	0	0	1	1	1	1	Major Facilitator Superfamily
isotig01372	PF00083.18	9.9e-48	162.5	24.9	1.2e-47	162.2	17.2	1.1	1	0	0	1	1	1	1	Sugar (and other) transporter
isotig01373	PF07690.10	1.7e-23	82.6	19.5	2.7e-23	82	13.5	1.2	1	0	0	1	1	1	1	Major Facilitator Superfamily
isotig01373	PF00083.18	9.9e-48	162.5	24.9	1.2e-47	162.2	17.2	1.1	1	0	0	1	1	1	1	Sugar (and other) transporter
isotig01374	PF07690.10	1.7e-23	82.6	19.5	2.7e-23	82	13.5	1.2	1	0	0	1	1	1	1	Major Facilitator Superfamily
isotig01374	PF00083.18	9.9e-48	162.5	24.9	1.2e-47	162.2	17.2	1.1	1	0	0	1	1	1	1	Sugar (and other) transporter
isotig01375	PF07690.10	1.7e-23	82.6	19.5	2.7e-23	82	13.5	1.2	1	0	0	1	1	1	1	Major Facilitator Superfamily
isotig01375	PF00083.18	9.9e-48	162.5	24.9	1.2e-47	162.2	17.2	1.1	1	0	0	1	1	1	1	Sugar (and other) transporter
isotig01376	PF07690.10	1.7e-23	82.6	19.5	2.7e-23	82	13.5	1.2	1	0	0	1	1	1	1	Major Facilitator Superfamily
isotig01376	PF00083.18	9.9e-48	162.5	24.9	1.2e-47	162.2	17.2	1.1	1	0	0	1	1	1	1	Sugar (and other) transporter
isotig01377	PF07690.10	1.7e-23	82.6	19.5	2.7e-23	82	13.5	1.2	1	0	0	1	1	1	1	Major Facilitator Superfamily
isotig01377	PF00083.18	9.9e-48	162.5	24.9	1.2e-47	162.2	17.2	1.1	1	0	0	1	1	1	1	Sugar (and other) transporter
isotig01378	PF07690.10	1.7e-23	82.6	19.5	2.7e-23	82	13.5	1.2	1	0	0	1	1	1	1	Major Facilitator Superfamily
isotig01378	PF00083.18	9.9e-48	162.5	24.9	1.2e-47	162.2	17.2	1.1	1	0	0	1	1	1	1	Sugar (and other) transporter
isotig01379	PF07690.10	1.7e-23	82.6	19.5	2.7e-23	82	13.5	1.2	1	0	0	1	1	1	1	Major Facilitator Superfamily
isotig01379	PF00083.18	9.9e-48	162.5	24.9	1.2e-47	162.2	17.2	1.1	1	0	0	1	1	1	1	Sugar (and other) transporter
isotig01380	PF07690.10	1.7e-23	82.6	19.5	2.7e-23	82	13.5	1.2	1	0	0	1	1	1	1	Major Facilitator Superfamily
isotig01380	PF00083.18	9.9e-48	162.5	24.9	1.2e-47	162.2	17.2	1.1	1	0	0	1	1	1	1	Sugar (and other) transporter
isotig01381	PF07690.10	1.7e-23	82.6	19.5	2.7e-23	82	13.5	1.2	1	0	0	1	1	1	1	Major Facilitator Superfamily
isotig01381	PF00083.18	9.9e-48	162.5	24.9	1.2e-47	162.2	17.2	1.1	1	0	0	1	1	1	1	Sugar (and other) transporter
isotig01382	PF07690.10	1.7e-23	82.6	19.5	2.7e-23	82	13.5	1.2	1	0	0	1	1	1	1	Major Facilitator Superfamily
isotig01382	PF00083.18	9.9e-48	162.5	24.9	1.2e-47	162.2	17.2	1.1	1	0	0	1	1	1	1	Sugar (and other) transporter
isotig01383	PF07690.10	1.7e-23	82.6	19.5	2.7e-23	82	13.5	1.2	1	0	0	1	1	1	1	Major Facilitator Superfamily
isotig01383	PF00083.18	9.9e-48	162.5	24.9	1.2e-47	162.2	17.2	1.1	1	0	0	1	1	1	1	Sugar (and other) transporter
isotig01384	PF07690.10	2.2e-23	82.3	19.5	3.6e-23	81.6	13.5	1.3	1	0	0	1	1	1	1	Major Facilitator Superfamily
isotig01384	PF00083.18	2.6e-47	161.1	24.4	3.3e-47	160.8	16.9	1.1	1	0	0	1	1	1	1	Sugar (and other) transporter
isotig01445	PF00665.20	3.2e-22	78.6	0	2.1e-21	75.9	0	2.3	2	0	0	2	2	1	1	Integrase core domain
isotig01445	PF03732.11	9e-05	22.2	0	0.4	10.5	0	2.5	2	0	0	2	2	2	2	Retrotransposon gag protein
isotig01445	PF00077.1	3.2e-09	36.3	0.1	6.3e-09	35.4	0	1.4	1	0	0	1	1	1	1	Retroviral aspartyl protease
isotig01445	PF00078.21	8e-12	44.7	0	1.5e-11	43.8	0	1.5	1	0	0	1	1	1	1	Reverse transcriptase (RNA-dependent DNA polymerase)
isotig01445	PF00078.21	1.5e-05	24.2	0	2.2e-05	23.6	0	1.2	1	0	0	1	1	1	1	Reverse transcriptase (RNA-dependent DNA polymerase)
isotig01445	PF00098.17	2.9e-10	39.2	8.2	3.5e-05	23.2	1	2.6	2	0	0	2	2	2	2	Zinc knuckle
isotig01446	PF09972.3	0.00036	18.9	0	0.00037	18.9	0	1.1	1	0	0	1	1	1	1	Predicted membrane protein (DUF2207)
isotig01446	PF07423.5	0.001	18.2	7.1	0.002	17.2	4.9	1.5	1	0	0	1	1	1	1	Protein of unknown function (DUF1510)
isotig01453	PF06024.6	0.0005	19.8	0	0.0014	18.3	0	1.8	1	0	0	1	1	1	1	Nucleopolyhedrovirus protein of unknown function (DUF912)
isotig01458	PF06024.6	0.00072	19.2	0.9	0.00098	18.8	0.6	1.5	1	1	0	1	1	1	1	Nucleopolyhedrovirus protein of unknown function (DUF912)
isotig01459	PF12685.1	0.00017	20.8	4.7	0.00058	19.1	3.3	1.8	1	1	0	1	1	1	1	SpoIIIAH-like protein
isotig01460	PF12685.1	7.1e-05	22.1	0.1	8.9e-05	21.7	0.1	1.2	1	0	0	1	1	1	1	SpoIIIAH-like protein
isotig01463	PF10351.3	0.00033	19.3	0.1	0.00038	19.1	0.1	1.1	1	0	0	1	1	1	1	Golgi-body localisation protein domain
isotig01463	PF06024.6	0.00071	19.3	0.4	0.00071	19.3	0.3	2.4	1	1	0	2	2	1	1	Nucleopolyhedrovirus protein of unknown function (DUF912)
isotig01463	PF08496.4	0.00051	19.5	6.5	0.00051	19.5	4.5	2.4	1	1	1	2	2	1	1	Peptidase family S49 N-terminal
isotig01463	PF00335.14	0.00073	18.5	1.9	0.2	10.6	0	2.2	2	0	0	2	2	1	1	Tetraspanin family
isotig01465	PF00342.1	2.4e-224	744.9	0.5	2.8e-224	744.7	0.4	1	1	0	0	1	1	1	1	Phosphoglucose isomerase
isotig01466	PF00342.1	2.4e-224	744.9	0.5	2.8e-224	744.7	0.4	1	1	0	0	1	1	1	1	Phosphoglucose isomerase
isotig01467	PF00342.1	2.4e-224	744.9	0.5	2.8e-224	744.7	0.4	1	1	0	0	1	1	1	1	Phosphoglucose isomerase
isotig01468	PF00342.1	2.4e-224	744.9	0.5	2.8e-224	744.7	0.4	1	1	0	0	1	1	1	1	Phosphoglucose isomerase
isotig01469	PF00342.1	2.4e-224	744.9	0.5	2.8e-224	744.7	0.4	1	1	0	0	1	1	1	1	Phosphoglucose isomerase
isotig01470	PF00342.1	2.4e-224	744.9	0.5	2.8e-224	744.7	0.4	1	1	0	0	1	1	1	1	Phosphoglucose isomerase
isotig01471	PF00342.1	1.2e-41	142.3	0	1.4e-41	142.2	0	1	1	0	0	1	1	1	1	Phosphoglucose isomerase
isotig01472	PF00342.1	1.2e-41	142.3	0	1.4e-41	142.2	0	1	1	0	0	1	1	1	1	Phosphoglucose isomerase
isotig01473	PF00342.1	2.4e-224	744.9	0.5	2.8e-224	744.7	0.4	1	1	0	0	1	1	1	1	Phosphoglucose isomerase
isotig01483	PF00310.1	2.5e-23	82.1	0	1.4e-14	53.3	0	2.4	1	1	1	2	2	2	2	Glutamine amidotransferases class-II
isotig01483	PF01380.16	1.3e-24	86	0	1.6e-24	85.7	0	1.1	1	0	0	1	1	1	1	SIS domain
isotig01483	PF01380.16	3.7e-12	45.7	0	3.9e-12	45.6	0	1	1	0	0	1	1	1	1	SIS domain
isotig01483	PF01380.16	1e-09	37.8	0	2.2e-09	36.7	0	1.5	1	0	0	1	1	1	1	SIS domain
isotig01484	PF00310.1	2.4e-23	82.1	0	1.4e-14	53.2	0	2.4	1	1	0	2	2	2	2	Glutamine amidotransferases class-II
isotig01484	PF01380.16	1e-09	37.8	0	2.2e-09	36.7	0	1.5	1	0	0	1	1	1	1	SIS domain
isotig01484	PF01380.16	1.3e-24	86	0	1.6e-24	85.7	0	1.1	1	0	0	1	1	1	1	SIS domain
isotig01484	PF01380.16	3.7e-12	45.7	0	3.9e-12	45.6	0	1	1	0	0	1	1	1	1	SIS domain
isotig01485	PF00310.1	2.5e-23	82.1	0	1.4e-14	53.3	0	2.4	1	1	1	2	2	2	2	Glutamine amidotransferases class-II
isotig01485	PF01380.16	1e-09	37.8	0	2.2e-09	36.7	0	1.5	1	0	0	1	1	1	1	SIS domain
isotig01485	PF01380.16	1.3e-24	86	0	1.6e-24	85.7	0	1.1	1	0	0	1	1	1	1	SIS domain
isotig01485	PF01380.16	3.7e-12	45.7	0	3.9e-12	45.6	0	1	1	0	0	1	1	1	1	SIS domain
isotig01486	PF00310.1	2.4e-23	82.1	0	1.4e-14	53.2	0	2.4	1	1	0	2	2	2	2	Glutamine amidotransferases class-II
isotig01486	PF01380.16	1.3e-24	86	0	1.6e-24	85.7	0	1.1	1	0	0	1	1	1	1	SIS domain
isotig01486	PF01380.16	1e-09	37.8	0	2.2e-09	36.7	0	1.5	1	0	0	1	1	1	1	SIS domain
isotig01486	PF01380.16	3.7e-12	45.7	0	3.9e-12	45.6	0	1	1	0	0	1	1	1	1	SIS domain
isotig01487	PF00310.1	2.5e-23	82.1	0	1.4e-14	53.3	0	2.4	1	1	1	2	2	2	2	Glutamine amidotransferases class-II
isotig01487	PF01380.16	1.3e-24	86	0	1.6e-24	85.7	0	1.1	1	0	0	1	1	1	1	SIS domain
isotig01487	PF01380.16	3.7e-12	45.7	0	3.9e-12	45.6	0	1	1	0	0	1	1	1	1	SIS domain
isotig01487	PF01380.16	1e-09	37.8	0	2.2e-09	36.7	0	1.5	1	0	0	1	1	1	1	SIS domain
isotig01488	PF00310.1	2.4e-23	82.1	0	1.4e-14	53.2	0	2.4	1	1	0	2	2	2	2	Glutamine amidotransferases class-II
isotig01488	PF01380.16	1.3e-24	86	0	1.6e-24	85.7	0	1.1	1	0	0	1	1	1	1	SIS domain
isotig01488	PF01380.16	3.7e-12	45.7	0	3.9e-12	45.6	0	1	1	0	0	1	1	1	1	SIS domain
isotig01488	PF01380.16	1e-09	37.8	0	2.2e-09	36.7	0	1.5	1	0	0	1	1	1	1	SIS domain
isotig01489	PF00310.1	2.5e-23	82.1	0	1.4e-14	53.3	0	2.4	1	1	1	2	2	2	2	Glutamine amidotransferases class-II
isotig01489	PF01380.16	1e-09	37.8	0	2.2e-09	36.7	0	1.5	1	0	0	1	1	1	1	SIS domain
isotig01489	PF01380.16	1.3e-24	86	0	1.6e-24	85.7	0	1.1	1	0	0	1	1	1	1	SIS domain
isotig01489	PF01380.16	3.7e-12	45.7	0	3.9e-12	45.6	0	1	1	0	0	1	1	1	1	SIS domain
isotig01490	PF00310.1	2.4e-23	82.1	0	1.4e-14	53.2	0	2.4	1	1	0	2	2	2	2	Glutamine amidotransferases class-II
isotig01490	PF01380.16	3.7e-12	45.7	0	3.9e-12	45.6	0	1	1	0	0	1	1	1	1	SIS domain
isotig01490	PF01380.16	1e-09	37.8	0	2.2e-09	36.7	0	1.5	1	0	0	1	1	1	1	SIS domain
isotig01490	PF01380.16	1.3e-24	86	0	1.6e-24	85.7	0	1.1	1	0	0	1	1	1	1	SIS domain
isotig01491	PF00310.1	2.5e-23	82.1	0	1.4e-14	53.3	0	2.4	1	1	1	2	2	2	2	Glutamine amidotransferases class-II
isotig01491	PF01380.16	3.7e-12	45.7	0	3.9e-12	45.6	0	1	1	0	0	1	1	1	1	SIS domain
isotig01491	PF01380.16	1.3e-24	86	0	1.6e-24	85.7	0	1.1	1	0	0	1	1	1	1	SIS domain
isotig01491	PF01380.16	1e-09	37.8	0	2.2e-09	36.7	0	1.5	1	0	0	1	1	1	1	SIS domain
isotig01492	PF00310.1	2.4e-23	82.1	0	1.4e-14	53.2	0	2.4	1	1	0	2	2	2	2	Glutamine amidotransferases class-II
isotig01492	PF01380.16	3.7e-12	45.7	0	3.9e-12	45.6	0	1	1	0	0	1	1	1	1	SIS domain
isotig01492	PF01380.16	1e-09	37.8	0	2.2e-09	36.7	0	1.5	1	0	0	1	1	1	1	SIS domain
isotig01492	PF01380.16	1.3e-24	86	0	1.6e-24	85.7	0	1.1	1	0	0	1	1	1	1	SIS domain
isotig01493	PF00310.1	2.5e-23	82.1	0	1.4e-14	53.3	0	2.4	1	1	1	2	2	2	2	Glutamine amidotransferases class-II
isotig01493	PF01380.16	1e-09	37.8	0	2.2e-09	36.7	0	1.5	1	0	0	1	1	1	1	SIS domain
isotig01493	PF01380.16	3.7e-12	45.7	0	3.9e-12	45.6	0	1	1	0	0	1	1	1	1	SIS domain
isotig01493	PF01380.16	1.3e-24	86	0	1.6e-24	85.7	0	1.1	1	0	0	1	1	1	1	SIS domain
isotig01494	PF00310.1	2.4e-23	82.1	0	1.4e-14	53.2	0	2.4	1	1	0	2	2	2	2	Glutamine amidotransferases class-II
isotig01494	PF01380.16	1.3e-24	86	0	1.6e-24	85.7	0	1.1	1	0	0	1	1	1	1	SIS domain
isotig01494	PF01380.16	1e-09	37.8	0	2.2e-09	36.7	0	1.5	1	0	0	1	1	1	1	SIS domain
isotig01494	PF01380.16	3.7e-12	45.7	0	3.9e-12	45.6	0	1	1	0	0	1	1	1	1	SIS domain
isotig01495	PF00310.1	2.5e-23	82.1	0	1.4e-14	53.3	0	2.4	1	1	1	2	2	2	2	Glutamine amidotransferases class-II
isotig01495	PF01380.16	3.7e-12	45.7	0	3.9e-12	45.6	0	1	1	0	0	1	1	1	1	SIS domain
isotig01495	PF01380.16	1e-09	37.8	0	2.2e-09	36.7	0	1.5	1	0	0	1	1	1	1	SIS domain
isotig01495	PF01380.16	1.3e-24	86	0	1.6e-24	85.7	0	1.1	1	0	0	1	1	1	1	SIS domain
isotig01496	PF00310.1	2.4e-23	82.1	0	1.4e-14	53.2	0	2.4	1	1	0	2	2	2	2	Glutamine amidotransferases class-II
isotig01496	PF01380.16	3.7e-12	45.7	0	3.9e-12	45.6	0	1	1	0	0	1	1	1	1	SIS domain
isotig01496	PF01380.16	1.3e-24	86	0	1.6e-24	85.7	0	1.1	1	0	0	1	1	1	1	SIS domain
isotig01496	PF01380.16	1e-09	37.8	0	2.2e-09	36.7	0	1.5	1	0	0	1	1	1	1	SIS domain
isotig01497	PF00310.1	2.5e-23	82.1	0	1.4e-14	53.3	0	2.4	1	1	1	2	2	2	2	Glutamine amidotransferases class-II
isotig01497	PF01380.16	3.7e-12	45.7	0	3.9e-12	45.6	0	1	1	0	0	1	1	1	1	SIS domain
isotig01497	PF01380.16	1.3e-24	86	0	1.6e-24	85.7	0	1.1	1	0	0	1	1	1	1	SIS domain
isotig01497	PF01380.16	1e-09	37.8	0	2.2e-09	36.7	0	1.5	1	0	0	1	1	1	1	SIS domain
isotig01498	PF00310.1	2.4e-23	82.1	0	1.4e-14	53.2	0	2.4	1	1	0	2	2	2	2	Glutamine amidotransferases class-II
isotig01498	PF01380.16	1e-09	37.8	0	2.2e-09	36.7	0	1.5	1	0	0	1	1	1	1	SIS domain
isotig01498	PF01380.16	3.7e-12	45.7	0	3.9e-12	45.6	0	1	1	0	0	1	1	1	1	SIS domain
isotig01498	PF01380.16	1.3e-24	86	0	1.6e-24	85.7	0	1.1	1	0	0	1	1	1	1	SIS domain
isotig01499	PF00310.1	2.5e-23	82.1	0	1.4e-14	53.3	0	2.4	1	1	1	2	2	2	2	Glutamine amidotransferases class-II
isotig01499	PF01380.16	1.3e-24	86	0	1.6e-24	85.7	0	1.1	1	0	0	1	1	1	1	SIS domain
isotig01499	PF01380.16	1e-09	37.8	0	2.2e-09	36.7	0	1.5	1	0	0	1	1	1	1	SIS domain
isotig01499	PF01380.16	3.7e-12	45.7	0	3.9e-12	45.6	0	1	1	0	0	1	1	1	1	SIS domain
isotig01500	PF00310.1	2.4e-23	82.1	0	1.4e-14	53.2	0	2.4	1	1	0	2	2	2	2	Glutamine amidotransferases class-II
isotig01500	PF01380.16	1.3e-24	86	0	1.6e-24	85.7	0	1.1	1	0	0	1	1	1	1	SIS domain
isotig01500	PF01380.16	3.7e-12	45.7	0	3.9e-12	45.6	0	1	1	0	0	1	1	1	1	SIS domain
isotig01500	PF01380.16	1e-09	37.8	0	2.2e-09	36.7	0	1.5	1	0	0	1	1	1	1	SIS domain
isotig01501	PF01380.16	1.2e-10	40.8	0	1.7e-10	40.3	0	1.2	1	0	0	1	1	1	1	SIS domain
isotig01501	PF01380.16	1.3e-24	86	0	1.6e-24	85.7	0	1.1	1	0	0	1	1	1	1	SIS domain
isotig01501	PF01380.16	3.7e-12	45.7	0	3.9e-12	45.6	0	1	1	0	0	1	1	1	1	SIS domain
isotig01502	PF01380.16	1.2e-10	40.8	0	1.7e-10	40.3	0	1.2	1	0	0	1	1	1	1	SIS domain
isotig01502	PF01380.16	3.7e-12	45.7	0	3.9e-12	45.6	0	1	1	0	0	1	1	1	1	SIS domain
isotig01502	PF01380.16	1.3e-24	86	0	1.6e-24	85.7	0	1.1	1	0	0	1	1	1	1	SIS domain
isotig01503	PF01380.16	1.3e-24	86	0	1.6e-24	85.7	0	1.1	1	0	0	1	1	1	1	SIS domain
isotig01503	PF01380.16	1.2e-10	40.8	0	1.7e-10	40.3	0	1.2	1	0	0	1	1	1	1	SIS domain
isotig01503	PF01380.16	3.7e-12	45.7	0	3.9e-12	45.6	0	1	1	0	0	1	1	1	1	SIS domain
isotig01504	PF01380.16	3.7e-12	45.7	0	3.9e-12	45.6	0	1	1	0	0	1	1	1	1	SIS domain
isotig01504	PF01380.16	1.2e-10	40.8	0	1.7e-10	40.3	0	1.2	1	0	0	1	1	1	1	SIS domain
isotig01504	PF01380.16	1.3e-24	86	0	1.6e-24	85.7	0	1.1	1	0	0	1	1	1	1	SIS domain
isotig01505	PF01380.16	3.7e-12	45.7	0	3.9e-12	45.6	0	1	1	0	0	1	1	1	1	SIS domain
isotig01505	PF01380.16	1.3e-24	86	0	1.6e-24	85.7	0	1.1	1	0	0	1	1	1	1	SIS domain
isotig01505	PF01380.16	1.2e-10	40.8	0	1.7e-10	40.3	0	1.2	1	0	0	1	1	1	1	SIS domain
isotig01506	PF01380.16	1.3e-24	86	0	1.6e-24	85.7	0	1.1	1	0	0	1	1	1	1	SIS domain
isotig01506	PF01380.16	3.7e-12	45.7	0	3.9e-12	45.6	0	1	1	0	0	1	1	1	1	SIS domain
isotig01506	PF01380.16	1.2e-10	40.8	0	1.7e-10	40.3	0	1.2	1	0	0	1	1	1	1	SIS domain
isotig01507	PF01380.16	1.3e-24	86	0	1.6e-24	85.7	0	1.1	1	0	0	1	1	1	1	SIS domain
isotig01507	PF01380.16	3.7e-12	45.7	0	3.9e-12	45.6	0	1	1	0	0	1	1	1	1	SIS domain
isotig01507	PF01380.16	1.2e-10	40.8	0	1.7e-10	40.3	0	1.2	1	0	0	1	1	1	1	SIS domain
isotig01508	PF01380.16	1.3e-24	86	0	1.6e-24	85.7	0	1.1	1	0	0	1	1	1	1	SIS domain
isotig01508	PF01380.16	3.7e-12	45.7	0	3.9e-12	45.6	0	1	1	0	0	1	1	1	1	SIS domain
isotig01508	PF01380.16	1.2e-10	40.8	0	1.7e-10	40.3	0	1.2	1	0	0	1	1	1	1	SIS domain
isotig01509	PF01380.16	1.2e-10	40.8	0	1.7e-10	40.3	0	1.2	1	0	0	1	1	1	1	SIS domain
isotig01509	PF01380.16	3.7e-12	45.7	0	3.9e-12	45.6	0	1	1	0	0	1	1	1	1	SIS domain
isotig01509	PF01380.16	1.3e-24	86	0	1.6e-24	85.7	0	1.1	1	0	0	1	1	1	1	SIS domain
isotig01510	PF01380.16	1.3e-24	86	0	1.6e-24	85.7	0	1.1	1	0	0	1	1	1	1	SIS domain
isotig01510	PF01380.16	1.2e-10	40.8	0	1.7e-10	40.3	0	1.2	1	0	0	1	1	1	1	SIS domain
isotig01510	PF01380.16	3.7e-12	45.7	0	3.9e-12	45.6	0	1	1	0	0	1	1	1	1	SIS domain
isotig01511	PF01380.16	3.7e-12	45.7	0	3.9e-12	45.6	0	1	1	0	0	1	1	1	1	SIS domain
isotig01511	PF01380.16	1.3e-24	86	0	1.6e-24	85.7	0	1.1	1	0	0	1	1	1	1	SIS domain
isotig01511	PF01380.16	1.2e-10	40.8	0	1.7e-10	40.3	0	1.2	1	0	0	1	1	1	1	SIS domain
isotig01512	PF01380.16	1.3e-24	86	0	1.6e-24	85.7	0	1.1	1	0	0	1	1	1	1	SIS domain
isotig01512	PF01380.16	1.2e-10	40.8	0	1.7e-10	40.3	0	1.2	1	0	0	1	1	1	1	SIS domain
isotig01512	PF01380.16	3.7e-12	45.7	0	3.9e-12	45.6	0	1	1	0	0	1	1	1	1	SIS domain
isotig01513	PF01380.16	3.7e-12	45.7	0	3.9e-12	45.6	0	1	1	0	0	1	1	1	1	SIS domain
isotig01513	PF01380.16	1.2e-10	40.8	0	1.7e-10	40.3	0	1.2	1	0	0	1	1	1	1	SIS domain
isotig01513	PF01380.16	1.3e-24	86	0	1.6e-24	85.7	0	1.1	1	0	0	1	1	1	1	SIS domain
isotig01514	PF01380.16	1.3e-24	86	0	1.6e-24	85.7	0	1.1	1	0	0	1	1	1	1	SIS domain
isotig01514	PF01380.16	1.2e-10	40.8	0	1.7e-10	40.3	0	1.2	1	0	0	1	1	1	1	SIS domain
isotig01514	PF01380.16	3.7e-12	45.7	0	3.9e-12	45.6	0	1	1	0	0	1	1	1	1	SIS domain
isotig01515	PF01380.16	1.3e-24	86	0	1.6e-24	85.7	0	1.1	1	0	0	1	1	1	1	SIS domain
isotig01515	PF01380.16	1.2e-10	40.8	0	1.7e-10	40.3	0	1.2	1	0	0	1	1	1	1	SIS domain
isotig01515	PF01380.16	3.7e-12	45.7	0	3.9e-12	45.6	0	1	1	0	0	1	1	1	1	SIS domain
isotig01516	PF01380.16	1.2e-10	40.8	0	1.7e-10	40.3	0	1.2	1	0	0	1	1	1	1	SIS domain
isotig01516	PF01380.16	3.7e-12	45.7	0	3.9e-12	45.6	0	1	1	0	0	1	1	1	1	SIS domain
isotig01516	PF01380.16	1.3e-24	86	0	1.6e-24	85.7	0	1.1	1	0	0	1	1	1	1	SIS domain
isotig01517	PF01380.16	1.3e-24	86	0	1.6e-24	85.7	0	1.1	1	0	0	1	1	1	1	SIS domain
isotig01517	PF01380.16	1.2e-10	40.8	0	1.7e-10	40.3	0	1.2	1	0	0	1	1	1	1	SIS domain
isotig01517	PF01380.16	3.7e-12	45.7	0	3.9e-12	45.6	0	1	1	0	0	1	1	1	1	SIS domain
isotig01518	PF01380.16	1.3e-24	86	0	1.6e-24	85.7	0	1.1	1	0	0	1	1	1	1	SIS domain
isotig01518	PF01380.16	3.7e-12	45.7	0	3.9e-12	45.6	0	1	1	0	0	1	1	1	1	SIS domain
isotig01518	PF01380.16	1.2e-10	40.8	0	1.7e-10	40.3	0	1.2	1	0	0	1	1	1	1	SIS domain
isotig01519	PF00310.1	2.5e-23	82.1	0	1.4e-14	53.3	0	2.4	1	1	1	2	2	2	2	Glutamine amidotransferases class-II
isotig01519	PF01380.16	3.7e-12	45.7	0	3.9e-12	45.6	0	1	1	0	0	1	1	1	1	SIS domain
isotig01519	PF01380.16	1e-09	37.8	0	2.2e-09	36.7	0	1.5	1	0	0	1	1	1	1	SIS domain
isotig01519	PF01380.16	1.3e-24	86	0	1.6e-24	85.7	0	1.1	1	0	0	1	1	1	1	SIS domain
isotig01520	PF00310.1	2.4e-23	82.1	0	1.4e-14	53.2	0	2.4	1	1	0	2	2	2	2	Glutamine amidotransferases class-II
isotig01520	PF01380.16	1e-09	37.8	0	2.2e-09	36.7	0	1.5	1	0	0	1	1	1	1	SIS domain
[truncated: 30,038 more rows]

## Sheet: sorted by description
description of target	# hits
Grand Total	32036
Major Facilitator Superfamily	529
Sugar (and other) transporter	388
Cytochrome P450	385
Carboxylesterase family	305
Trypsin	298
Protein kinase domain	288
Protein tyrosine kinase	277
Tetratricopeptide repeat	261
Alpha/beta hydrolase family	223
WD domain, G-beta repeat	214
EF hand	212
alpha/beta hydrolase fold	208
Immunoglobulin I-set domain	201
RNA recognition motif	180
Immunoglobulin domain	175
Immunoglobulin V-set domain	169
SIS domain	165
Miro-like protein	161
Short chain dehydrogenase	156
BTB/POZ domain	153
Leucine Rich repeats (2 copies)	140
Domain of unknown function (DUF227)	133
Juvenile hormone binding protein (JHBP)	133
Mitochondrial carrier protein	133
AMP-binding enzyme	132
KR domain	132
Ras family	132
haloacid dehalogenase-like hydrolase	128
Zinc finger, C2H2 type	125
Aminotransferase class I and II	124
ADP-ribosylation factor family	123
Ankyrin repeat	121
Ankyrin repeats (3 copies)	121
Phosphotransferase enzyme family	121
Reverse transcriptase (RNA-dependent DNA polymerase)	120
Lipase	115
Leucine Rich Repeat	112
Chitin binding Peritrophin-A domain	111
Elongation factor Tu GTP binding domain	110
Eukaryotic aspartyl protease	109
UDP-glucoronosyl and UDP-glucosyl transferase	106
Fatty acid desaturase	104
ABC transporter	103
CD80-like C2-set immunoglobulin domain	103
Thioredoxin	103
Protein of unknown function (DUF1679)	102
FAD dependent oxidoreductase	99
ATPase family associated with various cellular activities (AAA)	97
Hexokinase	96
Pyridine nucleotide-disulphide oxidoreductase	96
Helicase conserved C-terminal domain	95
Low-density lipoprotein receptor domain class A	91
Methyltransferase domain	88
Gtr1/RagA G protein conserved region	85
DEAD/DEAH box helicase	83
Lectin C-type domain	83
Zinc finger, C3HC4 type (RING finger)	83
Integrase core domain	81
Cytidylyltransferase	80
Regulator of chromosome condensation (RCC1) repeat	79
Papain family cysteine protease	78
NAD dependent epimerase/dehydratase family	77
FAD binding domain	76
Lipoprotein amino terminal region	76
Male sterility protein	76
Serine carboxypeptidase	76
RecF/RecN/SMC N terminal domain	73
Serine hydroxymethyltransferase	73
HEAT repeat	72
SH3 domain	72
Glutathione S-transferase, C-terminal domain	71
Aminotransferase class-V	70
Variant SH3 domain	70
Glycosyl hydrolases family 2, sugar binding domain	68
Kelch motif	66
Prolyl oligopeptidase family	66
CHCH domain	64
Tumour protein D52 family	64
Glutathione S-transferase, N-terminal domain	63
Cysteine-rich secretory protein family	62
Mechanosensitive ion channel porin domain	62
Anaphase-promoting complex, cyclosome, subunit 3	61
DnaJ domain	61
GNS1/SUR4 family	61
Immunoglobulin C1-set domain	61
PDZ domain (Also known as DHR or GLGF)	61
Signal recognition particle receptor beta subunit	61
TspO/MBR family	61
Zinc-finger double-stranded RNA-binding	60
Glycosyl hydrolases family 28	59
Beta-eliminating lyase	58
PH domain	58
LIM domain	56
PHD-finger	56
AAA domain (dynein-related subfamily)	55
Lipopolysaccharide kinase (Kdo/WaaP) family	55
SMP-30/Gluconolaconase/LRE-like region	55
Tetraspanin family	55
Transmembrane amino acid transporter protein	55
Glycosyl hydrolases family 31	54
Kazal-type serine protease inhibitor domain	54
Myelodysplasia-myeloid leukemia factor 1-interacting protein	53
RING-H2 zinc finger	53
Serine carboxypeptidase S28	53
Zinc-finger of C2H2 type	53
Cys/Met metabolism PLP-dependent enzyme	52
domain	52
SH2 domain	52
Dynamin family	51
Glycosyl hydrolases family 2, TIM barrel domain	51
Transforming growth factor beta like domain	51
Aldo/keto reductase family	50
CRAL/TRIO domain	50
Cytoskeletal-regulatory complex EF hand	50
GTPase of unknown function	50
KH domain	50
Protein of unknown function, DUF258	50
Ubiquitin carboxyl-terminal hydrolase	50
Armadillo/beta-catenin-like repeat	49
Insect cuticle protein	49
Palmitoyl protein thioesterase	49
THAP domain	49
ABC-2 type transporter	48
Adenylate kinase	48
Calcineurin-like phosphoesterase	48
Repeat of unknown function (DUF1136)	48
ABC-2 family transporter protein	47
Choline/Carnitine o-acyltransferase	47
Fibronectin type III domain	47
Ubiquitin family	47
ABC transporter transmembrane region	46
Calponin homology (CH) domain	46
Flavin-binding monooxygenase-like	46
Pacifastin inhibitor (LCMII)	46
Spectrin repeat	46
Cytochrome oxidase c subunit VIb	45
Alphaherpesvirus glycoprotein E	44
MIF4G domain	44
ATP-grasp domain	43
EGF-like domain	43
F-box-like	43
PBP/GOBP family	43
Acyltransferase	42
Natural killer cell receptor 2B4	42
Phosphoenolpyruvate carboxykinase	42
3-beta hydroxysteroid dehydrogenase/isomerase family	41
HI0933-like protein	41
Penicillin-Binding Protein C-terminus Family	41
AhpC/TSA family	40
Annexin	40
bZIP transcription factor	40
Cathepsin propeptide inhibitor domain (I29)	40
Glycosyltransferase family 28 C-terminal domain	40
Serpin (serine protease inhibitor)	40
Ubiquitin-conjugating enzyme	40
Beta-lactamase superfamily domain	39
Ca2+ insensitive EF hand	39
Holliday junction DNA helicase ruvB N-terminus	39
Metallo-beta-lactamase superfamily	39
Mitochondrial inner membrane protein	39
Redoxin	39
Secreted protein acidic and rich in cysteine Ca binding region	39
Type III restriction enzyme, res subunit	39
Methyltransferase small domain	38
Basic region leucine zipper	37
F-box domain	37
Gamma interferon inducible lysosomal thiol reductase (GILT)	37
SAM domain (Sterile alpha motif)	37
Thi4 family	37
Cyclic nucleotide-binding domain	36
EGF domain	36
Eukaryotic translation initiation factor eIF2A	36
Tubulin/FtsZ family, GTPase domain	36
Alpha-L-fucosidase	35
Aluminium resistance protein	35
Polysaccharide biosynthesis protein	35
RhoGEF domain	35
Acetyltransferase (GNAT) family	34
Acyl-CoA dehydrogenase, C-terminal domain	34
GMC oxidoreductase	34
Haemolysin-III related	34
Histidine phosphatase superfamily (branch 2)	34
Inhibitor of apoptosis-promoting Bax1	34
Adenylate kinase, active site lid	33
Alcohol dehydrogenase transcription factor Myb/SANT-like	33
Aldehyde dehydrogenase family	33
Autophagy protein 16 (ATG16)	33
CD36 family	33
CD47 immunoglobulin-like domain	33
Complement Clr-like EGF-like	33
DegT/DnrJ/EryC1/StrS aminotransferase family	33
E1-E2 ATPase	33
Low-density lipoprotein receptor repeat class B	33
Peptidase family M1	33
Zinc-binding dehydrogenase	33
Cytosol aminopeptidase family, catalytic domain	32
PLAT/LH2 domain	32
5' nucleotidase family	31
Nuclear envelope localisation domain	31
Ubiquitin-2 like Rad60 SUMO-like	31
Anaphase-promoting complex subunit 11 RING-H2 finger	30
C2H2 type zinc-finger	30
Dual specificity phosphatase, catalytic domain	30
Helix-loop-helix DNA-binding domain	30
HMG (high mobility group) box	30
Myosin head (motor domain)	30
NAD-dependent glycerol-3-phosphate dehydrogenase N-terminus	30
Peptidase C1-like family	30
S1 RNA binding domain	30
Sulfotransferase domain	30
Ataxin-2 C-terminal region	29
BTB And C-terminal Kelch	29
eIF4-gamma/eIF5/eIF2-epsilon	29
Glutamine amidotransferases class-II	29
IQ calmodulin-binding motif	29
Pyruvate kinase, barrel domain	29
TBC domain	29
Tubulin C-terminal domain	29
ZIP Zinc transporter	29
Activin types I and II receptor domain	28
Double-stranded RNA binding motif	28
Enoyl-CoA hydratase/isomerase family	28
FERM central domain	28
Ferrous iron transport protein B	28
Laminin Domain I	28
NADP oxidoreductase coenzyme F420-dependent	28
Nucleoporin Nup120/160	28
Phorbol esters/diacylglycerol binding domain (C1 domain)	28
Phospholipase D/viral envelope	28
Pyridoxal-dependent decarboxylase, C-terminal sheet domain	28
Pyridoxal-dependent decarboxylase, pyridoxal binding domain	28
Touch receptor neuron protein Mec-17	28
Zinc carboxypeptidase	28
A1 Propeptide	27
Alpha amylase, catalytic domain	27
Calsequestrin	27
CAMSAP CH domain	27
emp24/gp25L/p24 family/GOLD	27
Endonuclease/Exonuclease/phosphatase family	27
Fungal family of unknown function (DUF1776)	27
Glycosyl hydrolase family 1	27
Glycosyl hydrolases family 18	27
Golgi 4-transmembrane spanning transporter	27
G-protein alpha subunit	27
non-SMC mitotic condensation complex subunit 1	27
BESS motif	26
Domain of unknown function	26
FERM N-terminal domain	26
HCO3- transporter family	26
HECT-domain (ubiquitin-transferase)	26
Phytanoyl-CoA dioxygenase (PhyH)	26
Protein-tyrosine phosphatase	26
3-oxo-5-alpha-steroid 4-dehydrogenase	25
Anaphase promoting complex (APC) subunit 2	25
Biotin-requiring enzyme	25
Choline/ethanolamine kinase	25
Eukaryotic-type carbonic anhydrase	25
Formylglycine-generating sulfatase enzyme	25
Glucose inhibited division protein A	25
Kinesin motor domain	25
Ligand-binding domain of nuclear hormone receptor	25
Magnesium chelatase, subunit ChlI	25
N-acetylmuramoyl-L-alanine amidase	25
PAS fold	25
RhoGAP domain	25
Tudor domain	25
7tm Chemosensory receptor	24
Acyl CoA binding protein	24
Adaptin N terminal region	24
BMP and activin membrane-bound inhibitor (BAMBI) N-terminal domain	24
CoA-ligase	24
Cyclin, N-terminal domain	24
FKBP-type peptidyl-prolyl cis-trans isomerase	24
Glutaredoxin	24
Glycosyl transferases group 1	24
LSM domain	24
Mannosyltransferase (PIG-M)	24
MATH domain	24
Protein phosphatase 2C	24
TCP-1/cpn60 chaperonin family	24
Zeta toxin	24
Zinc knuckle	24
Baculovirus polyhedron envelope protein, PEP, C terminus	23
FAR-17a/AIG1-like protein	23
Fumarylacetoacetate (FAA) hydrolase family	23
Galactose binding lectin domain	23
Hsp70 protein	23
IncA protein	23
Ion transport protein	23
IstB-like ATP binding protein	23
RNase H	23
SNF2 family N-terminal domain	23
Bromodomain	22
C2 domain	22
Copper/zinc superoxide dismutase (SODC)	22
Domain of unknown function (DUF1943)	22
Flavin containing amine oxidoreductase	22
Isocitrate/isopropylmalate dehydrogenase	22
Laminin G domain	22
Liver-expressed antimicrobial peptide 2 precursor (LEAP-2)	22
Myosin tail	22
Patatin-like phospholipase	22
Phospholipase/Carboxylesterase	22
Protein of unknown function (DUF1602)	22
Retroviral aspartyl protease	22
Vacuolar 14 Fab1-binding region	22
Calcium-binding EGF domain	21
Collagen triple helix repeat (20 copies)	21
Cyclophilin type peptidyl-prolyl cis-trans isomerase/CLD	21
Elongation factor Tu domain 2	21
Major intrinsic protein	21
MtN3/saliva family	21
SNARE domain	21
Tubulin-tyrosine ligase family	21
Acyl-CoA dehydrogenase, middle domain	20
Band 3 cytoplasmic domain	20
Cytosol aminopeptidase family, N-terminal domain	20
FERM C-terminal PH-like domain	20
Hydrogenase-1 expression protein HyaE	20
Hypoxia induced protein conserved region	20
Organic Anion Transporter Polypeptide (OATP) family	20
Peptidase family M20/M25/M40	20
Peptidase M16 inactive domain	20
Perilipin family	20
Putative methyltransferase	20
PX domain	20
Pyridoxal-dependent decarboxylase conserved domain	20
Reovirus sigma C capsid protein	20
RING-variant domain	20
RNA binding motif	20
AAA domain (Cdc48 subfamily)	19
A-macroglobulin complement component	19
Amino acid permease	19
Carbamoyl-phosphate synthase L chain, ATP binding domain	19
'Cold-shock' DNA-binding domain	19
Cullin family	19
Domain of unknown function (DUF543)	19
Helix-hairpin-helix motif	19
Insect pheromone-binding family, A10/OS-D	19
MA3 domain	19
Nucleosome assembly protein (NAP)	19
PA domain	19
PAN domain	19
PCI domain	19
Peptidase C13 family	19
Peptidase family M13	19
Phosphotyrosine interaction domain (PTB/PID)	19
Proteasome subunit	19
Protein of unknown function (DUF3421)	19
Ribosomal protein L11 methyltransferase (PrmA)	19
Sulfatase	19
WW domain	19
Amino acid kinase family	18
Aspartyl/Asparaginyl beta-hydroxylase	18
BAR domain	18
Cation transporter/ATPase, N-terminus	18
CLASP N terminal	18
Dehydrogenase E1 component	18
Domain of unknown function (DUF1981)	18
MreB/Mbl protein	18
NUDIX domain	18
PAZ domain	18
Protein of unknown function (DUF1295)	18
RIO1 family	18
RNA helicase	18
TIP49 C-terminus	18
von Willebrand factor type D domain	18
Alanine dehydrogenase/PNT, C-terminal domain	17
Cation transporting ATPase, C-terminus	17
Core histone H2A/H2B/H3/H4	17
Domain of unknown function (DUF3448)	17
FG-GAP repeat	17
FYVE zinc finger	17
G-patch domain	17
HhH-GPD superfamily base excision DNA repair protein	17
Laminin EGF-like (Domains III and V)	17
Metallopeptidase family M24	17
Mitochondrial ATP synthase coupling factor 6	17
Partial alpha/beta-hydrolase lipase region	17
Rer1 family	17
RWD domain	17
SET domain	17
Synaptobrevin	17
Tricarboxylate carrier	17
UBA/TS-N domain	17
7 transmembrane receptor (rhodopsin family)	16
Adenovirus E3 region protein CR2	16
Apolipoprotein A1/A4/E domain	16
ATP synthase subunit C	16
Calpain family cysteine protease	16
CUB domain	16
DAD family	16
Dynein heavy chain and region D6 of dynein motor	16
Eukaryotic cytochrome b561	16
Galactosyltransferase	16
Histone-like transcription factor (CBF/NF-Y) and archaeal histone	16
HpcH/HpaI aldolase/citrate lyase family	16
Major royal jelly protein	16
Melibiase	16
Phospholipase D Active site motif	16
Pyruvate kinase, alpha/beta domain	16
Ribonuclease T2 family	16
RmlD substrate binding domain	16
rRNA processing/ribosome biogenesis	16
SecA DEAD-like domain	16
Snf7	16
SPFH domain / Band 7 family	16
Transmembrane alpha-helix domain	16
tRNA synthetase class II core domain (G, H, P, S and T)	16
Acyl-CoA dehydrogenase, N-terminal domain	15
Aldose 1-epimerase	15
Alpha-2-macroglobulin family N-terminal region	15
Amidase	15
ATP synthase subunit H	15
Biotin carboxylase C-terminal domain	15
Carbamoyl-phosphate synthase L chain, N-terminal domain	15
Cell division protein FtsA	15
Complex 1 protein (LYR family)	15
D-ala D-ala ligase C-terminus	15
ENTH domain	15
Erv1 / Alr family	15
Human growth factor-like EGF	15
Insulinase (Peptidase family M16)	15
Intermediate filament protein	15
Kringle domain	15
Kunitz/Bovine pancreatic trypsin inhibitor domain	15
Lecithin:cholesterol acyltransferase	15
MAP7 (E-MAP-115) family	15
Microtubule associated	15
Mpv17 / PMP22 family	15
Peptidase family M28	15
Peptidase family M48	15
Phosphotyrosine-binding domain	15
PRELI-like family	15
Ras association (RalGDS/AF-6) domain	15
Sec7 domain	15
Spc7 kinetochore protein	15
SPRY domain	15
Thiolase, N-terminal domain	15
Troponin	15
UBX domain	15
2OG-Fe(II) oxygenase superfamily	14
Actin	14
ANTH domain	14
Bacterial protein of unknown function (DUF879)	14
Bacterial protein of unknown function (DUF948)	14
BRCA1 C Terminus (BRCT) domain	14
Calcineurin-like phosphoesterase superfamily domain	14
Carbon-nitrogen hydrolase	14
Class II Aldolase and Adducin N-terminal domain	14
Coenzyme A transferase	14
DSBA-like thioredoxin domain	14
EamA-like transporter family	14
EF-1 guanine nucleotide exchange domain	14
Eukaryotic elongation factor 1 beta central acidic region	14
Ezrin/radixin/moesin family	14
Flavinator of succinate dehydrogenase	14
FR47-like protein	14
Gelsolin repeat	14
Glutamine synthetase, beta-Grasp domain	14
Glutamine synthetase, catalytic domain	14
Glycosyl hydrolase family 79, N-terminal domain	14
Guanylate-binding protein, N-terminal domain	14
Histone deacetylase domain	14
HIT domain	14
Late nodulin protein	14
NAD binding domain of 6-phosphogluconate dehydrogenase	14
NHL repeat	14
Nup133 N terminal like	14
PAP2 superfamily	14
Peptidase dimerisation domain	14
Peroxisomal membrane anchor protein (Pex14p) conserved region	14
PhoD-like phosphatase	14
Phosphatidylinositol 3- and 4-kinase	14
Phosphoglucose isomerase	14
Phosphoribosyl transferase domain	14
Polycystin cation channel	14
Protein of unknown function (DUF1664)	14
Rad17 cell cycle checkpoint protein	14
Renin receptor-like protein	14
Scramblase	14
Sulfate transporter family	14
Suppressor of forked protein (Suf)	14
TATA element modulatory factor 1 DNA binding	14
Tim10/DDP family zinc finger	14
Trehalase	14
Triose-phosphate Transporter family	14
Type-F conjugative transfer system pilin assembly protein	14
Zinc-finger associated domain (zf-AD)	14
Alcohol dehydrogenase GroES-like domain	13
Animal haem peroxidase	13
Bacterial transferase hexapeptide (six repeats)	13
CAF1 family ribonuclease	13
Calpain large subunit, domain III	13
Clathrin adaptor complex small chain	13
DExH-box splicing factor binding site	13
Eukaryotic protein of unknown function (DUF953)	13
GAD domain	13
Glycosyl transferase family 8	13
GPI transamidase subunit PIG-U	13
IBR domain	13
IMP dehydrogenase / GMP reductase domain	13
Initiation factor 2 subunit family	13
Kinesin-associated protein (KAP)	13
MFS_1 like family	13
p25-alpha	13
Phosphatidylinositol-specific phospholipase C, X domain	13
Protein of unknown function (DUF2029)	13
Protein of unknown function (DUF634)	13
Protein of unknown function (DUF815)	13
Region in Clathrin and VPS	13
Ribosomal protein L1p/L10e family	13
Ricin-type beta-trefoil lectin domain	13
Scavenger mRNA decapping enzyme C-term binding	13
Septum formation initiator	13
Sodium:solute symporter family	13
Tex-like protein N-terminal domain	13
Thymidylate kinase	13
TLC domain	13
Transketolase, pyrimidine binding domain	13
tRNA synthetases class II (D, K and N)	13
Ubiquitin interaction motif	13
Vacuole effluxer Atg22 like	13
V-ATPase subunit H	13
AAA-like domain	12
Aminotransferase class-III	12
Anticodon binding domain	12
Antifungal peptide	12
Apyrase	12
Beta-ketoacyl synthase, N-terminal domain	12
BNIP3	12
Cadherin domain	12
Calponin family repeat	12
Cleft lip and palate transmembrane protein 1 (CLPTM1)	12
Coatomer WD associated region	12
COP9 signalosome, subunit CSN8	12
CS domain	12
C-type lysozyme/alpha-lactalbumin family	12
Cyclin, C-terminal domain	12
Cytochrome b5-like Heme/Steroid binding domain	12
DHHC zinc finger domain	12
Domain of unknown function (DUF316)	12
Dynein heavy chain, N-terminal region 1	12
Ethanolamine utilisation - propanediol utilisation	12
Exonuclease	12
Filamin/ABP280 repeat	12
Glycosyl transferase family 2	12
Glyoxalase-like domain	12
GNT-I family	12
Group XII secretory phospholipase A2 precursor (PLA2G12)	12
homogentisate 1,2-dioxygenase	12
Importin-beta N-terminal domain	12
Integrin, beta chain	12
LITAF-like zinc ribbon domain	12
MbeD/MobD like	12
Molybdopterin guanine dinucleotide synthesis protein B	12
Myb-like DNA-binding domain	12
NACHT domain	12
Peptidase S24-like	12
Piwi domain	12
Plant protein of unknown function (DUF869)	12
PPR repeat	12
Protein of unknown function (DUF1386)	12
Protein of unknown function, DUF654	12
Pyrimidine 5'-nucleotidase (UMPH-1)	12
Ribosomal protein L7Ae/L30e/S12e/Gadd45 family	12
SAC3/GANP/Nin1/mts3/eIF-3 p25 family	12
Scavenger receptor cysteine-rich domain	12
SelR domain	12
SHNi-TPR	12
Sodium/hydrogen exchanger family	12
Sushi domain (SCR repeat)	12
TIM21	12
TLD	12
Tom37 C-terminal domain	12
Transposase	12
tRNA synthetases class I (I, L, M and V)	12
tRNA synthetases class I (M)	12
UAA transporter family	12
Zinc finger C-x8-C-x5-C-x3-H type (and similar)	12
Zinc-finger of the MIZ type in Nse subunit	12
3'5'-cyclic nucleotide phosphodiesterase	11
3-hydroxyacyl-CoA dehydrogenase, NAD binding domain	11
A-kinase anchoring protein 95 (AKAP95)	11
Alg9-like mannosyltransferase family	11
Alpha-2-macroglobulin family	11
A-macroglobulin receptor	11
Aminomethyltransferase folate-binding domain	11
B-box zinc finger	11
CAP-Gly domain	11
Caspase domain	11
CBS domain	11
Chromodomain	11
Conserved hypothetical ATP binding protein	11
Cystatin domain	11
Elongation factor Tu C-terminal domain	11
Endomembrane protein 70	11
EXS family	11
FGGY family of carbohydrate kinases, C-terminal domain	11
FHA domain	11
FIP domain	11
Glycosyl hydrolase family 47	11
Glycosyl hydrolases family 38 N-terminal domain	11
HCaRG protein	11
Inhibitor of growth proteins N-terminal histone-binding	11
Membrane-associating domain	11
Methyl-CpG binding domain	11
MIT (microtubule interacting and transport) domain	11
Mov34/MPN/PAD-1 family	11
NAD-specific glutamate dehydrogenase	11
Oligonucleotide/oligosaccharide-binding (OB)-fold	11
Peptidase S26	11
pfkB family carbohydrate kinase	11
Phosphatidylethanolamine-binding protein	11
Phosphoglucomutase/phosphomannomutase, alpha/beta/alpha domain I	11
Phosphoglucomutase/phosphomannomutase, alpha/beta/alpha domain II	11
Plexin repeat	11
Poly-adenylate binding protein, unique domain	11
PPPDE putative peptidase domain	11
Prefoldin subunit	11
Protein of unknown function (DUF3584)	11
RNA binding domain	11
Serine hydrolase (FSH1)	11
Serpentine type 7TM GPCR chemoreceptor Srsx	11
Tat binding protein 1(TBP-1)-interacting protein (TBPIP)	11
Tropomyosin	11
V-type ATPase 116kDa subunit family	11
3' exoribonuclease family, domain 1	10
3-hydroxyacyl-CoA dehydrogenase, C-terminal domain	10
Adenosine-deaminase (editase) domain	10
AICARFT/IMPCHase bienzyme	10
AIR synthase related protein, C-terminal domain	10
Alpha amylase, C-terminal all-beta domain	10
Alpha-macro-globulin thiol-ester bond-forming region	10
BED zinc finger	10
Cellulase (glycosyl hydrolase family 5)	10
Cofilin/tropomyosin-type actin-binding protein	10
Cullin protein neddylation domain	10
Dienelactone hydrolase family	10
DnaJ C terminal domain	10
Fes/CIP4, and EFC/F-BAR homology domain	10
FGGY family of carbohydrate kinases, N-terminal domain	10
Glycosyl hydrolases family 38 C-terminal domain	10
GrpE	10
Guanine nucleotide exchange factor in Golgi transport N-terminal	10
hAT family dimerisation domain	10
Histidine kinase-, DNA gyrase B-, and HSP90-like ATPase	10
Homeobox associated leucine zipper	10
Homeobox domain	10
Inositol monophosphatase family	10
JNK_SAPK-associated protein-1	10
lactate/malate dehydrogenase, alpha/beta C-terminal domain	10
MAPEG family	10
MobA-like NTP transferase domain	10
Nuclear RNA-splicing-associated protein	10
Nucleotidyl transferase	10
Osteopetrosis-associated transmembrane protein 1 precursor	10
OTU-like cysteine protease	10
Outer mitochondrial membrane transport complex protein	10
Oxysterol-binding protein	10
Plasma-membrane choline transporter	10
POT family	10
Protein of unknown function (DUF1698)	10
Putative GTPase activating protein for Arf	10
Putative RNA methylase family UPF0020	10
Pyridoxamine 5'-phosphate oxidase	10
Ribosomal protein S10p/S20e	10
Sec23/Sec24 zinc finger	10
Septation ring formation regulator, EzrA	10
Sigma-54 interaction domain	10
SOCS box	10
SRP54-type protein, GTPase domain	10
Tektin family	10
ThiF family	10
Thiolase, C-terminal domain	10
Thrombospondin type 1 domain	10
TPR/MLP1/MLP2-like protein	10
Tropomyosin like	10
twin BRCT domain	10
Two component regulator propeller	10
Type I phosphodiesterase / nucleotide pyrophosphatase	10
U-box domain	10
UDP-glucose/GDP-mannose dehydrogenase family, NAD binding domain	10
Uricase	10
Zn-finger in Ran binding protein and others	10
Zona pellucida-like domain	10
Adenylate and Guanylate cyclase catalytic domain	9
Alpha mannosidase, middle domain	9
Amylo-alpha-1,6-glucosidase	9
Anticodon-binding domain of tRNA	9
ATP-binding dynein motor region D5	9
BSD domain	9
Casein kinase substrate phosphoprotein PP28	9
CobQ/CobB/MinD/ParA nucleotide binding domain	9
C-terminal domain of 1-Cys peroxiredoxin	9
Cytochrome c oxidase subunit VIc	9
D-isomer specific 2-hydroxyacid dehydrogenase, NAD binding domain	9
DNA/RNA non-specific endonuclease	9
Dynein heavy chain, N-terminal region 2	9
Fructose-bisphosphate aldolase class-I	9
Fungal trichothecene efflux pump (TRI12)	9
GLTT repeat (6 copies)	9
Glycosyltransferase sugar-binding region containing DXD motif	9
Guanylate-kinase-associated protein (GKAP) protein	9
Helicase associated domain (HA2)	9
Hemopexin	9
Histidine phosphatase superfamily (branch 1)	9
HIT zinc finger	9
Innexin	9
Integrin alpha	9
Ion channel regulatory protein UNC-93	9
Laminin Domain II	9
Lycopene cyclase protein	9
Microtubule-binding stalk of dynein motor	9
MSP (Major sperm protein) domain	9
MYND finger	9
OST-HTH/LOTUS domain	9
Oxidoreductase NAD-binding domain	9
Pao retrotransposon peptidase	9
Peptidase family M41	9
Phosphofructokinase	9
PQ loop repeat	9
Prenyltransferase and squalene oxidase repeat	9
Prolyl 4-Hydroxylase alpha-subunit, N-terminal region	9
Protein of unknown function (DUF1397)	9
Protein-L-isoaspartate(D-aspartate) O-methyltransferase (PCMT)	9
Rap/ran-GAP	9
Reduced folate carrier	9
Sec23/Sec24 beta-sandwich domain	9
Sec23/Sec24 helical domain	9
Sec23/Sec24 trunk domain	9
Sel1 repeat	9
Septin	9
SMC proteins Flexible Hinge Domain	9
Sodium / potassium ATPase beta chain	9
Sodium:neurotransmitter symporter family	9
Sphingolipid Delta4-desaturase (DES)	9
STAS domain	9
Tropomodulin	9
UV radiation resistance protein and autophagy-related subunit 14	9
Vinculin family	9
Vps4 C terminal oligomerisation domain	9
WH1 domain	9
2Fe-2S iron-sulfur cluster binding domain	8
2-oxoacid dehydrogenases acyltransferase (catalytic domain)	8
4Fe-4S binding domain	8
Adenylylsulphate kinase	8
AIR synthase related protein, N-terminal domain	8
Alpha/beta hydrolase of unknown function (DUF900)	8
Alphaherpesvirus glycoprotein I	8
Amidohydrolase family	8
Archaeal ATPase	8
ArgK protein	8
ATP synthase alpha/beta family, nucleotide-binding domain	8
ATP-sulfurylase	8
Calcipressin	8
CoA binding domain	8
Conserved hypothetical protein 95	8
CRAL/TRIO, N-terminal domain	8
Cystine-knot domain	8
DAN domain	8
Deoxyribonuclease II	8
Diacylglycerol acyltransferase	8
DM4/DM12 family	8
Elongation factor G C-terminus	8
Enolase, C-terminal TIM barrel domain	8
Enolase, N-terminal domain	8
Ets-domain	8
Eukaryotic initiation factor 4E	8
Exportin 1-like protein	8
FNIP Repeat	8
Fork head domain	8
Formate--tetrahydrofolate ligase	8
Fringe-like	8
Glycine cleavage T-protein C-terminal barrel domain	8
GTP cyclohydrolase I feedback regulatory protein (GFRP)	8
Guanylate kinase	8
helix-turn-helix, Psq domain	8
Hydrolytic ATP binding site of dynein motor region D1	8
Inosine-uridine preferring nucleoside hydrolase	8
Inositol polyphosphate kinase	8
JmjC domain	8
KOW motif	8
Malic enzyme, NAD binding domain	8
Malic enzyme, N-terminal domain	8
MCM2/3/5 family	8
Membrane dipeptidase (Peptidase family M19)	8
Memo-like protein	8
MG2 domain	8
MIZ/SP-RING zinc finger	8
ML domain	8
MORN repeat	8
NAD-dependent glycerol-3-phosphate dehydrogenase C-terminus	8
Neurotransmitter-gated ion-channel ligand binding domain	8
OB-fold nucleic acid binding domain	8
Peptide methionine sulfoxide reductase	8
PhoH-like protein	8
Phosducin	8
Phosphatidylinositol-4-phosphate 5-Kinase	8
Phospholipase A2	8
Phosphomethylpyrimidine kinase	8
Phosphopantetheine attachment site	8
Proteasome non-ATPase 26S subunit	8
Proteasome subunit A N-terminal signature	8
Protein of unknown function (DUF1309)	8
Protein of unknown function (DUF229)	8
Protein of unknown function (DUF2730)	8
Protein of unknown function (DUF727)	8
Putative lysophospholipase	8
Putative peptidase (DUF1758)	8
Putative zinc finger in N-recognin (UBR box)	8
Radical SAM superfamily	8
RanBP1 domain	8
Reeler domain	8
Retinal pigment epithelial membrane protein	8
Roadblock/LC7 domain	8
Sad1 / UNC-like C-terminal	8
SAP domain	8
Sec1 family	8
Sec8 exocyst complex component specific domain	8
Sir2 family	8
Snare region anchored in the vesicle membrane C-terminus	8
Spc97 / Spc98 family	8
Spermine/spermidine synthase	8
Sulfotransferase family	8
Sybindin-like family	8
Syntaxin	8
Thaumatin family	8
Thymidine kinase	8
Tim17/Tim22/Tim23/Pmp24 family	8
TM2 domain	8
Transcription elongation factor Elf1 like	8
tRNA synthetases class I (C) catalytic domain	8
Ty3 transposon peptidase	8
Type II/IV secretion system protein	8
ubiE/COQ5 methyltransferase family	8
Ulp1 protease family, C-terminal catalytic domain	8
Uncharacterised protein family (UPF0160)	8
Uncharacterized conserved protein (DUF2075)	8
Vacuolar sorting protein 9 (VPS9) domain	8
von Willebrand factor type C domain	8
WSC domain	8
Ydr279p protein family (RNase H2 complex component)	8
Zinc finger, C4 type (two domains)	8
Zinc finger, ZZ type	8
Zn-finger in ubiquitin-hydrolases and other protein	8
Arrestin (or S-antigen), C-terminal domain	7
Arthropod defensin	7
Asparaginase	7
ATP synthase alpha/beta family, beta-barrel domain	7
Autophagy protein Atg8 ubiquitin like	7
Axonemal dynein light chain	7
Bacterial type II secretion system protein G	7
BAH domain	7
Calcium binding and coiled-coil domain (CALCOCO1) like	7
Carboxyl transferase domain	7
C-terminal tandem repeated domain in type 4 procollagen	7
Cytochrome c oxidase subunit IV	7
Death domain	7
Dopey, N-terminal	7
EB module	7
Elongation factor G, domain IV	7
Exo70 exocyst complex subunit	7
Flavodoxin	7
Formin Homology 2 Domain	7
Frag1/DRAM/Sfk1 family	7
Fumble	7
Glutaminase	7
Glutamine amidotransferase class-I	7
Golgi transport complex subunit 5	7
Helix-turn-helix	7
Hemocyanin, copper containing domain	7
Hsp20/alpha crystallin family	7
Hydantoinase/oxoprolinase	7
Ion channel	7
K+ channel tetramerisation domain	7
lactate/malate dehydrogenase, NAD binding domain	7
LacY proton/sugar symporter	7
Ligand-gated ion channel	7
Limkain b1	7
Lipase (class 3)	7
Met-10+ like-protein	7
Mitochondrial 28S ribosomal protein S30 (PDCD9)	7
Mono-functional DNA-alkylating methyl methanesulfonate N-term	7
MOZ/SAS family	7
MutS domain V	7
Ndr family	7
NLI interacting factor-like phosphatase	7
NLS-binding and DNA-binding and dimerisation domains of Nrf1	7
NOSIC (NUC001) domain	7
Nuclear transport factor 2 (NTF2) domain	7
Nucleotide-sugar transporter	7
Phosphatidylinositol transfer protein	7
Phosphoglucomutase/phosphomannomutase, alpha/beta/alpha domain III	7
P-loop containing dynein motor region D3	7
Polyprenyl synthetase	7
Protein kinase C terminal domain	7
Protein of unknown function (DUF1740)	7
Protein of unknown function (DUF3456)	7
Protein of unknown function (DUF3808)	7
Protein of unknown function DUF89	7
Protein of unknown function, DUF255	7
Putative snoRNA binding domain	7
R3H domain	7
Regulator of G protein signaling domain	7
RF-1 domain	7
Ribosomal protein L4/L1 family	7
RNA dependent RNA polymerase	7
RNA polymerase Rpb3/Rpb11 dimerisation domain	7
RUN domain	7
Saposin-like type B, region 1	7
Sedlin, N-terminal conserved region	7
SNARE associated Golgi protein	7
Taurine catabolism dioxygenase TauD, TfdA family	7
Tctex-1 family	7
TraB family	7
Transferrin	7
Ubiquitin-like autophagy protein Apg12	7
Uncharacterised protein family (UPF0041)	7
Uncharacterised protein family (UPF0154)	7
Voltage gated chloride channel	7
Vps5 C terminal like	7
WHEP-TRS domain	7
WWE domain	7
[2Fe-2S] binding domain	6
3' exoribonuclease family, domain 2	6
7tm Odorant receptor	6
Acetyl-CoA carboxylase, central region	6
Acetyl-CoA hydrolase/transferase N-terminal domain	6
Acyl-CoA oxidase	6
Alanine racemase, N-terminal domain	6
Anaphase-promoting complex subunit 4 WD40 domain	6
Angiotensin-converting enzyme	6
ARID/BRIGHT DNA binding domain	6
Arrestin (or S-antigen), N-terminal domain	6
Bacterial Ig-like domain (group 2)	6
Bacterial RNA polymerase, alpha chain C terminal domain	6
Brix domain	6
Carboxypeptidase activation peptide	6
Cation efflux family	6
CDP-alcohol phosphatidyltransferase	6
Chlorophyllase enzyme	6
Ctr copper transporter family	6
DDE superfamily endonuclease	6
DDHD domain	6
DENN (AEX-3) domain	6
Dihydrodipicolinate synthetase family	6
Dihydrouridine synthase (Dus)	6
D-isomer specific 2-hydroxyacid dehydrogenase, catalytic domain	6
Domain of unknown function (DUF1903)	6
Domain of unknown function (DUF3342)	6
Double zinc ribbon	6
EF hand associated	6
ER lumen protein retaining receptor	6
Ferritin-like domain	6
Flagella accessory protein C (FlaC)	6
Fructose-1-6-bisphosphatase	6
FtsJ-like methyltransferase	6
Glucosidase II beta subunit-like	6
GLUT4 regulating protein TUG	6
Glutathione peroxidase	6
GRAM domain	6
HAP1 N-terminal conserved region	6
Heavy-metal-associated domain	6
Hemocyanin, all-alpha domain	6
Hemocyanin, ig-like domain	6
HlyD family secretion protein	6
Integrin beta cytoplasmic domain	6
Integrin beta tail domain	6
jmjN domain	6
KaiC	6
La domain	6
linker histone H1 and H5 family	6
Microtubule associated protein (MAP65/ASE1 family)	6
Mlp lipoprotein family	6
Mob1/phocein family	6
Mycolic acid cyclopropane synthetase	6
NADH-ubiquinone oxidoreductase B15 subunit (NDUFB4)	6
Neurochondrin	6
Neutral/alkaline non-lysosomal ceramidase	6
Nicastrin	6
NOP5NT (NUC127) domain	6
Nucleoside H+ symporter	6
Nucleotidyltransferase domain	6
Oxidative-stress-responsive kinase 1 C terminal	6
Pam16	6
Peptidase C26	6
Phosphoribosylglycinamide synthetase, ATP-grasp (A) domain	6
P-loop containing dynein motor region D4	6
PP-loop family	6
Prominin	6
Protein of unknown function (DUF1682)	6
Protein of unknown function (DUF3585)	6
Protein of unknown function (DUF3595)	6
Protein of unknown function, DUF481	6
Protein prenyltransferase alpha subunit repeat	6
PT repeat	6
Putative mitochondrial precursor protein	6
PWI domain	6
Pyridine nucleotide-disulphide oxidoreductase, dimerisation domain	6
Receptor family ligand binding region	6
REJ domain	6
Rel homology domain (RHD)	6
Retrotransposon gag protein	6
RNA polymerase Rpb1, domain 5	6
RNA polymerase Rpb7-like, N-terminal domain	6
SCP-2 sterol transfer family	6
SDA1	6
Siphovirus Gp157	6
Splicing factor 3B subunit 10 (SF3b10)	6
SRP40, C-terminal domain	6
Ssl1-like	6
Sterile alpha motif (SAM)/Pointed domain	6
TatD related DNase	6
Tetrahydrofolate dehydrogenase/cyclohydrolase, NAD(P)-binding domain	6
Tim44-like domain	6
Transcription factor S-II (TFIIS)	6
Transketolase, C-terminal domain	6
Translation initiation factor eIF3 subunit 135	6
Transmembrane Fragile-X-F protein	6
tRNA synthetases class I (E and Q), catalytic domain	6
tRNA synthetases class I (R)	6
tRNA synthetases class II core domain (F)	6
TSC-22/dip/bun family	6
U1 zinc finger	6
U11-48K-like CHHC zinc finger	6
Ubiquitin-specific protease 7	6
UDP-glucose:Glycoprotein Glucosyltransferase	6
Vacuolar ATP synthase subunit S1 (ATP6S1)	6
V-ATPase subunit C	6
Zinc-binding	6
14-3-3 protein	5
26S proteasome subunit RPN7	5
3'-5' exonuclease	5
4F5 protein family	5
6-phosphofructo-2-kinase	5
ABC transporter, phosphonate, periplasmic substrate-binding protein	5
Acyl transferase domain	5
Acyl-CoA reductase (LuxC)	5
Acyltransferase family	5
Adaptor complexes medium subunit family	5
Adenosine/AMP deaminase	5
Afadin- and alpha -actinin-Binding	5
Alanine dehydrogenase/PNT, N-terminal domain	5
AN1-like Zinc finger	5
Anion-transporting ATPase	5
ATG C terminal domain	5
ATP dependent DNA ligase domain	5
ATP synthase (E/31 kDa) subunit	5
ATP synthase alpha/beta chain, C terminal domain	5
ATP-NAD kinase	5
BAG domain	5
Bin/amphiphysin/Rvs domain for vesicular trafficking	5
BolA-like protein	5
BRICHOS domain	5
BRO1-like domain	5
Calcium-activated chloride channel	5
Chromatin associated protein KTI12	5
Class II histone deacetylase complex subunits 2 and 3	5
Complex I intermediate-associated protein 30 (CIA30)	5
Creatinase/Prolidase N-terminal domain	5
CRPV capsid protein like	5
CybS	5
Cytochrome c oxidase biogenesis protein Cmc1 like	5
DC-STAMP-like protein	5
Der1-like family	5
DIL domain	5
DNA polymerase family B	5
DNA polymerase type B, organellar and viral	5
Domain found in IF2B/IF5	5
Domain of Unknown Function (DUF1081)	5
Domain of unknown function (DUF1986)	5
Domain of unknown function (DUF3552)	5
Dor1-like family	5
DSS1/SEM1 family	5
Dynein light chain type 1	5
EB1-like C-terminal motif	5
Endoplasmic Reticulum Oxidoreductin 1 (ERO1)	5
ERp29, N-terminal domain	5
ETC complex I subunit conserved region	5
Eukaryotic porin	5
FAT domain	5
FF domain	5
Fibrinogen alpha/beta chain family	5
FtsH Extracellular	5
GGL domain	5
GHMP kinases N terminal domain	5
Glycine cleavage H-protein	5
Glycosyl hydrolase family 20, catalytic domain	5
Glycosyl hydrolases family 25	5
Glycosyltransferase family 20	5
Glyoxalase/Bleomycin resistance protein/Dioxygenase superfamily	5
GMP-PDE, delta subunit	5
Golgin subfamily A member 5	5
Got1/Sft2-like family	5
GRIP domain	5
Human adenovirus early E3A glycoprotein	5
Inhibitor of Apoptosis domain	5
Inositol phosphatase	5
Integrin alpha cytoplasmic region	5
Intra-flagellar transport protein 57	5
Iron-sulphur cluster biosynthesis	5
Keratinocyte-associated protein 2	5
Laminin B (Domain IV)	5
Lanthionine synthetase C-like protein	5
LETM1-like protein	5
Leucine-rich repeats of kinetochore protein Cenp-F/LEK1	5
Lipoma HMGIC fusion partner-like protein	5
LUC7 N_terminus	5
Lyase	5
Mannosyltransferase (PIG-V))	5
MAS20 protein import receptor	5
MBOAT family	5
Membrane fusion protein Use1	5
MGS-like domain	5
Mib_herc2	5
Misato Segment II myosin-like domain	5
Mitochondrial ribosomal subunit protein	5
Mitotic checkpoint protein	5
Mitotic-spindle organizing gamma-tubulin ring associated	5
Molybdopterin-binding domain of aldehyde dehydrogenase	5
MOSC domain	5
MOSC N-terminal beta barrel domain	5
MPPN (rrm-like) domain	5
Multicopper oxidase	5
MYM-type Zinc finger with FCS sequence motif	5
NOL1/NOP2/sun family	5
Nucleopolyhedrovirus P10 protein	5
Oxidoreductase-like protein, N-terminal	5
P5-type ATPase cation transporter	5
Patched family	5
PGAP1-like protein	5
Phage Conserved Open Reading Frame 51	5
Phage integrase family	5
Phosphoglycerate kinase	5
Phosphorylase superfamily	5
Plasmodium ookinete surface protein Pvs28	5
PMP-22/EMP/MP20/Claudin family	5
Poly(A) polymerase	5
Possible Fer4-like domain in RNase L inhibitor, RLI	5
Protein of unknown function (DUF1162)	5
Protein of unknown function (DUF1193)	5
Protein of unknown function (DUF1681)	5
Protein of unknown function (DUF1759)	5
Protein of unknown function (DUF2763)	5
Protein of unknown function (DUF3317)	5
Protein of unknown function (DUF3424)	5
Protein of unknown function (DUF667)	5
Protein of unknown function (DUF904)	5
Protein of unknown function N-terminal domain (DUF2450)	5
Protein of unknown function, DUF618	5
Protein phosphatase 2A regulatory B subunit (B56 family)	5
Protein phosphatase inhibitor 2 (IPP-2)	5
PRP38 family	5
Putative esterase	5
PWWP domain	5
Rap1 Myb domain	5
RasGEF domain	5
Regulator of Vps4 activity in the MVB pathway	5
Regulatory subunit of type II PKA R-subunit	5
Replication termination factor 2	5
Reticulon	5
Rft protein	5
Rhomboid family	5
Ribosomal protein L10	5
Ribosomal protein L24e	5
Ribosomal protein L7/L12 C-terminal domain	5
Ribosomal protein S18	5
Ribosomal protein S26e	5
Ribosomal protein S9/S16	5
Ribosomal RNA adenine dimethylase	5
Rieske [2Fe-2S] domain	5
RNA polymerase Rpb1, domain 2	5
RNA polymerase Rpb1, domain 3	5
RNA polymerase Rpb1, domain 4	5
S4 domain	5
Saccharopine dehydrogenase	5
SacI homology domain	5
Seadornavirus VP7	5
Sec20	5
Sec34-like family	5
Sec63 Brl domain	5
Serpentine type 7TM GPCR chemoreceptor Srx	5
Seryl-tRNA synthetase N-terminal domain	5
Sigma-70, region 4	5
Sodium Bile acid symporter family	5
Sodium/calcium exchanger protein	5
Sterol-sensing domain of SREBP cleavage-activation	5
Surp module	5
Survival motor neuron protein (SMN)	5
TAP C-terminal domain	5
TATA element modulatory factor 1 TATA binding	5
Tetrahydrofolate dehydrogenase/cyclohydrolase, catalytic domain	5
TGS domain	5
Threonyl and Alanyl tRNA synthetase second additional domain	5
TIR domain	5
Transforming acidic coiled-coil-containing protein (TACC)	5
Transport protein particle (TRAPP) component	5
tRNA synthetases class I (W and Y)	5
Ubiquinol-cytochrome C reductase complex, 6.4kD protein	5
Ubiquitin carboxyl-terminal hydrolase, family 1	5
uDENN domain	5
Vacuolar protein sorting protein 36 Vps36	5
Vacuolar sorting protein 39 domain 2	5
Vitamin-D-receptor interacting Mediator subunit 4	5
Vps53-like, N-terminal	5
56kDa selenium binding protein (SBP56)	4
60s Acidic ribosomal protein	4
7 transmembrane receptor (Secretin family)	4
A20-like zinc finger	4
ABC transporter transmembrane region 2	4
ABC1 family	4
Acylphosphatase	4
Adaptin C-terminal domain	4
Adenylate cyclase associated (CAP) C terminal	4
Adenylate cyclase associated (CAP) N terminal	4
ADP-ribosylglycohydrolase	4
Aldehyde oxidase and xanthine dehydrogenase, a/b hammerhead domain	4
Alkaline phosphatase	4
Alternative splicing regulator	4
Aminopeptidase P, N-terminal domain	4
Anaphase-promoting complex APC subunit 1	4
Arginyl tRNA synthetase N terminal domain	4
ARP2/3 complex 20 kDa subunit (ARPC4)	4
Arsenite-resistance protein 2	4
Asparagine synthase	4
Astacin (Peptidase family M12A)	4
ATP synthase D chain, mitochondrial (ATP5H)	4
ATP synthase E chain	4
Autophagy protein Apg17	4
Autophagy protein Apg6	4
Bacillus haemolytic enterotoxin (HBL)	4
Bacterial transcriptional activator domain	4
Beta-galactosidase	4
Beta-ketoacyl synthase, C-terminal domain	4
Beta-propeller repeat	4
Biotin/lipoate A/B protein ligase family	4
Bunyavirus RNA dependent RNA polymerase	4
Cactus-binding C-terminus of cactin protein	4
Cadherin-like	4
Caenorhabditis protein of unknown function, DUF268	4
Calcium/calmodulin dependent protein kinase II Association	4
Carbohydrate phosphorylase	4
Casein kinase 1 gamma C terminal	4
Catalase	4
CBF/Mak21 family	4
CHDNT (NUC034) domain	4
Clathrin light chain	4
Clp protease	4
CO dehydrogenase flavoprotein C-terminal domain	4
CobW/HypB/UreG, nucleotide-binding domain	4
Component of IIS longevity pathway SMK-1	4
Conserved mid region of cactin	4
Cornichon protein	4
CPSF A subunit region	4
Crustacean CHH/MIH/GIH neurohormone family	4
C-terminal, D2-small domain, of ClpB protein	4
Cyclin	4
Cytochrome c oxidase subunit VIIa	4
DALR anticodon binding domain	4
dDENN domain	4
DEK C terminal domain	4
Det1 complexing ubiquitin ligase	4
Diacylglycerol kinase catalytic domain	4
Diaphanous FH3 Domain	4
DNA polymerase family B, exonuclease domain	4
DnaJ central domain	4
Domain found in Dishevelled, Egl-10, and Pleckstrin (DEP)	4
Domain of unknown function (DUF2014)	4
Domain of unknown function (DUF3546)	4
Domain of unknown function (DUF3635)	4
Domain of unknown function (DUF367)	4
Domain of unknown function (DUF3814)	4
DOMON domain	4
Double stranded RNA binding protein (DUF2051)	4
Dpy-30 motif	4
DWNN domain	4
Dynamin central region	4
Dynamin GTPase effector domain	4
Dynein associated protein	4
E2F/DP family winged-helix DNA-binding domain	4
eRF1 domain 1	4
eRF1 domain 2	4
eRF1 domain 3	4
Eukaryotic protein of unknown function (DUF914)	4
Exocyst complex subunit Sec15-like	4
F5/8 type C domain	4
FAD binding domain in molybdopterin dehydrogenase	4
Fatty acid hydroxylase superfamily	4
FERM adjacent (FA)	4
Formyl transferase	4
G2F domain	4
Galactoside-binding lectin	4
GATA zinc finger	4
GatB/GatE catalytic domain	4
GINS complex protein	4
Globin	4
Glucose-6-phosphate dehydrogenase, C-terminal domain	4
Glucose-6-phosphate dehydrogenase, NAD binding domain	4
Glycogen synthase	4
Glycosyl hydrolases family 15	4
Growth-Arrest-Specific Protein 2 Domain	4
Hamartin protein	4
HD domain	4
Herpes virus tegument protein U30	4
High-temperature-induced dauer-formation protein	4
His(2)-Cys(2) zinc finger	4
HIUase/Transthyretin family	4
Homeobox KN domain	4
Hr1 repeat	4
Hsp90 protein	4
I/LWEQ domain	4
IKI3 family	4
Importin beta binding domain	4
Indigoidine synthase A like protein	4
Integral membrane protein S linking to the trans Golgi network	4
Interferon-related developmental regulator (IFRD)	4
Iron-binding zinc finger CDGSH type	4
Isochorismatase family	4
isoform II	4
Legume-like lectin family	4
Ligated ion channel L-glutamate- and glycine-binding site	4
lipin, N-terminal conserved region	4
LisH	4
LNS2 (Lipin/Ned1/Smp2)	4
Low temperature viability protein	4
LysM domain	4
Mad3/BUB1 homology region 1	4
Mammalian taste receptor protein (TAS2R)	4
Mannosyl oligosaccharide glucosidase	4
Med18 protein	4
Membrane magnesium transporter	4
MIR domain	4
Mitochondrial 28S ribosomal protein S27	4
Mitochondrial 39-S ribosomal protein L47 (MRP-L47)	4
Mitochondrial ribosomal protein L51 / S25 / CI-B8 domain	4
mRNA capping enzyme, catalytic domain	4
mTERF	4
MULE transposase domain	4
Multiprotein bridging factor 1	4
NAD(P) transhydrogenase beta subunit	4
NADH ubiquinone oxidoreductase subunit NDUFA12	4
Natural resistance-associated macrophage protein	4
Neurotransmitter-gated ion-channel transmembrane region	4
Nrap protein	4
Nucleoside diphosphate kinase	4
Optic atrophy 3 protein (OPA3)	4
PA26 p53-induced protein (sestrin)	4
PBS lyase HEAT-like repeat	4
Peptidase M16C associated	4
PET Domain	4
Phosphatidyl serine synthase	4
Phosphoglucomutase/phosphomannomutase, C-terminal domain	4
Phosphoribosylglycinamide synthetase, C domain	4
Phosphoribosylglycinamide synthetase, N domain	4
picornavirus capsid protein	4
Plant protein of unknown function (DUF827)	4
Plasma membrane calcium transporter ATPase C terminal	4
Plectin repeat	4
Plectrovirus spv1-c74 ORF 12 transmembrane protein	4
Poly (ADP-ribose) glycohydrolase (PARG)	4
pORF2a truncated protein	4
PRA1 family protein	4
PRANC domain	4
pre-RNA processing PIH1/Nop17	4
PRMT5 arginine-N-methyltransferase	4
Proline dehydrogenase	4
Protein of unknown function (DUF1032)	4
Protein of unknown function (DUF1075)	4
Protein of unknown function (DUF1160)	4
Protein of unknown function (DUF1279)	4
Protein of unknown function (DUF1298)	4
Protein of unknown function (DUF1465)	4
Protein of unknown function (DUF1546)	4
Protein of unknown function (DUF1777)	4
Protein of unknown function (DUF1779)	4
Protein of unknown function (DUF2031)	4
Protein of unknown function (DUF2392)	4
Protein of unknown function (DUF2870)	4
Protein of unknown function (DUF717)	4
Protein of unknown function (DUF837)	4
Protein of unknown function (DUF938)	4
Protein of unknown function (DUF972)	4
PTB domain (IRS-1 type)	4
Putative bacteriophage terminase small subunit	4
Putative diphthamide synthesis protein	4
Putative Phosphatase	4
Putative serine esterase (DUF676)	4
Pyridoxal-phosphate dependent enzyme	4
Pyridoxine 5'-phosphate oxidase C-terminal dimerisation region	4
Quinolinate phosphoribosyl transferase, N-terminal domain	4
Rab5 binding	4
Rab5-interacting protein (Rab5ip)	4
Ran binding protein in the microtubule-organising centre	4
RasGEF N-terminal motif	4
Repeat of unknown function (DUF1126)	4
Replication factor C	4
Reprolysin family propeptide	4
Retinoic acid induced 16-like protein	4
Rhodanese-like domain	4
Ribosomal protein L14p/L23e	4
Ribosomal protein L18e/L15	4
Ribosomal protein L31e	4
Ribosomal protein S12	4
Ribosomal protein S4/S9 N-terminal domain	4
Ribosomal protein S5, N-terminal domain	4
Ribosome recycling factor	4
RNA binding activity-knot of a chromodomain	4
RNA pol II promoter Fmp27 protein domain	4
RNA polymerase III subunit Rpc25	4
RNA polymerase Rpb1, domain 1	4
RNA polymerase Rpb6	4
Sarcosine oxidase, gamma subunit family	4
Sds3-like	4
Sec23-binding domain of Sec16	4
Serine incorporator (Serinc)	4
Seven in absentia protein family	4
Sodium:dicarboxylate symporter family	4
SPOC domain	4
Subtilase family	4
Subunit 21 of Mediator complex	4
Survival motor neuron (SMN) interacting protein 1 (SIP1)	4
SUZ domain	4
SWIB/MDM2 domain	4
Tap, RNA-binding	4
TB2/DP1, HVA22 family	4
TcdA/TcdB catalytic glycosyltransferase domain	4
Tellurite resistance protein TehB	4
Telomerase activating protein Est1	4
TFIIB zinc-binding	4
Thiamine pyrophosphate enzyme, C-terminal TPP binding domain	4
Thioesterase domain	4
ThiS family	4
Thrombin inhibitor Madanin	4
Thymopoietin protein	4
TNFR/NGFR cysteine-rich region	4
Transcription factor TFIIB repeat	4
Transient receptor ion channel II	4
Transmembrane protein	4
Transposase zinc-ribbon domain	4
tRNA (Uracil-5-)-methyltransferase	4
tRNA synthetases class II (A)	4
TROVE domain	4
Ubiquinol-cytochrome C reductase, UQCRX/QCR9 like	4
Ubiquitin-fold modifier-conjugating enzyme 1	4
Uncharacterized conserved protein (DUF2043)	4
Uncharacterized conserved protein (DUF2346)	4
Uncharacterized conserved protein H4 (DUF2046)	4
Uncharacterized protein conserved in bacteria (DUF2130)	4
Villin headpiece domain	4
Viral (Superfamily 1) RNA helicase	4
Vitamin K epoxide reductase family	4
von Willebrand factor type A domain	4
Vps16, N-terminal region	4
Vps51/Vps67	4
WW-domain ligand protein	4
XPG I-region	4
XPG N-terminal domain	4
Yip1 domain	4
YT521-B-like domain	4
Zc3h12a-like Ribonuclease NYN domain	4
4Fe-4S dicluster domain	3
4Fe-4S iron sulfur cluster binding proteins, NifH/frxC family	3
5'-AMP-activated protein kinase beta subunit, interation domain	3
5-formyltetrahydrofolate cyclo-ligase family	3
5'-nucleotidase, C-terminal domain	3
ABC-type uncharacterized transport system	3
Abscisic acid G-protein coupled receptor	3
Adenylosuccinate lyase C-terminus	3
ADP-specific Phosphofructokinase/Glucokinase conserved region	3
AIG1 family	3
AIG2-like family	3
Aldehyde ferredoxin oxidoreductase, N-terminal domain	3
Alpha 1,4-glycosyltransferase conserved region	3
Alpha/beta hydrolase of unknown function (DUF915)	3
Amiloride-sensitive sodium channel	3
Anaphase-promoting complex, subunit 10 (APC10)	3
Aph-1 protein	3
Apolipoprotein O	3
Arfaptin-like domain	3
Aromatic-di-Alanine (AdAR) repeat	3
Aspartate carbamoyltransferase regulatory chain, metal binding domain	3
Aspartyl protease	3
ATP-dependent protease La (LON) domain	3
BAAT / Acyl-CoA thioester hydrolase C terminal	3
Bacterial dnaA protein	3
Bacterial extracellular solute-binding proteins, family 3	3
Bacterial protein of unknown function (DUF883)	3
Bacterial protein of unknown function (DUF894)	3
Barrier to autointegration factor	3
B-cell receptor-associated protein 31-like	3
Beige/BEACH domain	3
Bestrophin, RFP-TM, chloride channel	3
Beta-Casp domain	3
Biopterin-dependent aromatic amino acid hydroxylase	3
BPS (Between PH and SH2)	3
BRK domain	3
BTG family	3
BtpA family	3
bZIP Maf transcription factor	3
C1-like domain	3
C2 domain of PTEN tumour-suppressor protein	3
C-5 cytosine-specific DNA methylase	3
Catalase-related immune-responsive	3
CCR4-Not complex component, Not1	3
Cell division protein 48 (CDC48), domain 2	3
Cell division protein 48 (CDC48), N-terminal domain	3
Chondroitin N-acetylgalactosaminyltransferase	3
Citrate synthase	3
Clathrin propeller repeat	3
CNH domain	3
Coatomer epsilon subunit	3
COG (conserved oligomeric Golgi) complex component, COG2	3
COMPASS (Complex proteins associated with Set1p) component shg1	3
Conserved carboxylase domain	3
Conserved region in glutamate synthase	3
Coproporphyrinogen III oxidase	3
CP2 transcription factor	3
CTD kinase subunit gamma CTK3	3
CTP synthase N-terminus	3
CUE domain	3
Cupin domain	3
cwf18 pre-mRNA splicing factor	3
cwf21 domain	3
Cytidine and deoxycytidylate deaminase zinc-binding region	3
Cytochrome c	3
Cytochrome C and Quinol oxidase polypeptide I	3
Cytochrome c/c1 heme lyase	3
Cytochrome D1 heme domain	3
Cytochrome oxidase assembly protein	3
Cytochrome oxidase c subunit VIII	3
DASH complex subunit Dad2	3
DB module	3
Dephospho-CoA kinase	3
Diacylglycerol kinase accessory domain	3
Diaphanous GTPase-binding Domain	3
Dihydroorotate dehydrogenase	3
Dip2/Utp12 Family	3
Dipeptidyl peptidase IV (DPP IV) N-terminal region	3
DJ-1/PfpI family	3
DNA ligase N terminus	3
DNA polymerase subunit Cdc27	3
Domain of unknown function (DUF1785)	3
Domain of unknown function (DUF1875)	3
Domain of unknown function (DUF1900)	3
Domain of Unknown Function (DUF1907)	3
Domain of unknown function (DUF3402)	3
Domain of unknown function DUF59	3
Domain of Unknown Function with PDB structure	3
DSHCT (NUC185) domain	3
DUSP domain	3
Dyggve-Melchior-Clausen syndrome protein	3
DZF domain	3
ELM2 domain	3
Endoplasmic reticulum protein ERp29, C-terminal domain	3
Endoplasmic reticulum vesicle transporter	3
Enhancer of polycomb-like	3
Essential protein Yae1, N terminal	3
Eukaryotic family of unknown function (DUF1754)	3
Eukaryotic protein of unknown function (DUF829)	3
Exocyst complex component Sec3	3
FAD linked oxidases, C-terminal domain	3
FANCL C-terminal domain	3
Fascin domain	3
FAST kinase-like protein, subdomain 1	3
FAST kinase-like protein, subdomain 2	3
FATC domain	3
Fcf1	3
Fez1	3
FFD and TFG box motifs	3
Flavivirus DEAD domain	3
FLYWCH zinc finger domain	3
FMN-dependent dehydrogenase	3
Foie gras liver health family 1	3
FOP N terminal dimerisation domain	3
Furin-like cysteine rich region	3
GAF domain	3
GAGA factor	3
Galactokinase galactose-binding signature	3
Galactose-3-O-sulfotransferase	3
Gamma-glutamyltranspeptidase	3
Gamma-thionin family	3
GDP dissociation inhibitor	3
GDP/GTP exchange factor Sec2p	3
GLE1-like protein	3
Glutamate-cysteine ligase	3
Glutaredoxin-like domain (DUF836)	3
Glycine rich protein family	3
Glycoprotease family	3
Glycosyl hydrolases family 16	3
Glycosyl hydrolases family 35	3
Glycosyl transferase family, a/b domain	3
Glycosyl transferase family, helical bundle domain	3
Golgi-body localisation protein domain	3
HAND	3
Helix-turn-helix domain	3
Hereditary spastic paraplegia protein strumpellin	3
Histidine biosynthesis protein	3
Histone chaperone Rttp106-like	3
Histone methylation protein DOT1	3
Histone-binding protein RBBP4 or subunit C of CAF1 complex	3
HMGL-like	3
Homocysteine S-methyltransferase	3
HOOK protein	3
Hormone receptor domain	3
HRDC domain	3
HSA	3
HTH domain	3
Hyaluronan / mRNA binding family	3
Hypothetical methyltransferase	3
impB/mucB/samB family	3
Interferon-alpha/beta receptor, fibronectin type III	3
Inward rectifier potassium channel	3
IPT/TIG domain	3
Iron-containing alcohol dehydrogenase	3
ISXO2-like transposase domain	3
Kinesin protein	3
L27 domain	3
Lipocalin / cytosolic fatty-acid binding protein family	3
LMBR1-like membrane protein	3
Lung seven transmembrane receptor	3
Mab-21 protein	3
Maf-like protein	3
MaoC like domain	3
mbt repeat	3
Mediator complex subunit 23	3
Membrane-associated apoptosis protein	3
MgsA AAA+ ATPase C terminal	3
Microtubule-binding protein MIP-T3	3
Mitochondrial ATPase inhibitor, IATP	3
Mitochondrial ribosomal protein MRP-S35	3
Mitochondrial ribosomal subunit S27	3
Modifier of rudimentary (Mod(r)) protein	3
MRG	3
MT-A70	3
Myosin N-terminal SH3-like domain	3
Myotubularin-related	3
MyTH4 domain	3
N2,N2-dimethylguanosine tRNA methyltransferase	3
Na(+)-translocating NADH-quinone reductase subunit A (NQRA)	3
N-acetylglucosaminyltransferase II (MGAT2)	3
N-acetyltransferase	3
NAD synthase	3
NAD(P)H binding domain of trans-2-enoyl-CoA reductase	3
NADH:ubiquinone oxidoreductase subunit B14.5a (Complex I-B14.5a)	3
NADH-ubiquinone oxidoreductase-G iron-sulfur binding region	3
NADH-Ubiquinone/plastoquinone (complex I), various chains	3
NB-ARC domain	3
Neuralized	3
Neuroparsin	3
NifU-like N terminal domain	3
NLE (NUC135) domain	3
Nodulation protein S (NodS)	3
NOGCT (NUC087) domain	3
Nse1 non-SMC component of SMC5-6 complex	3
N-terminal region of Chorein, a TM vesicle-mediated sorter	3
Nucleolar GTP-binding protein 1 (NOG1)	3
Nucleopolyhedrovirus protein of unknown function (DUF912)	3
Nucleoporin protein Ndc1-Nup	3
NUDE protein, C-terminal conserved region	3
Oligosaccharyl transferase STT3 subunit	3
P21-Rho-binding domain	3
P53 DNA-binding domain	3
ParA/MinD ATPase like	3
Parvovirus non-structural protein NS1	3
Peptidase C65 Otubain	3
Peptidase family C1 propeptide	3
Peptidase family C78	3
Per1-like	3
Peroxisomal biogenesis factor 11 (PEX11)	3
Pex19 protein family	3
Pex2 / Pex12 amino terminal region	3
Phosphatidylinositolglycan class N (PIG-N)	3
Phosphatidylserine decarboxylase	3
Phosphoinositide 3-kinase family, accessory domain (PIK domain)	3
Phosphoinositide-specific phospholipase C, efhand-like	3
Phosphoribulokinase / Uridine kinase family	3
PIG-X / PBN1	3
Poly(A) polymerase central domain	3
Poly(A) polymerase predicted RNA binding domain	3
Poly(ADP-ribose) polymerase catalytic domain	3
Polysaccharide deacetylase	3
PPP5	3
PQQ enzyme repeat	3
Predicted membrane protein	3
Predicted transmembrane and coiled-coil 2 protein	3
Pre-mRNA splicing factor PRP21 like protein	3
Pre-mRNA splicing Prp18-interacting factor	3
Proprotein convertase P-domain	3
Proteasome beta subunits C terminal	3
Proteasome complex subunit Rpn13 ubiquitin receptor	3
Protein kinase A anchor protein nuclear localisation signal	3
Protein of unknown function (DUF1077)	3
Protein of unknown function (DUF1208)	3
Protein of unknown function (DUF1431)	3
Protein of unknown function (DUF2012)	3
Protein of unknown function (DUF2424)	3
Protein of unknown function (DUF2435)	3
Protein of unknown function (DUF2615)	3
Protein of unknown function (DUF2884)	3
Protein of unknown function (DUF3505)	3
Protein of unknown function (DUF3735)	3
Protein of unknown function (DUF410)	3
Protein of unknown function (DUF525)	3
Protein of unknown function (DUF745)	3
Protein of unknown function (DUF800)	3
Protein of unknown function (DUF999)	3
Protein of unknown function, DUF270	3
Protein similar to CwfJ C-terminus 1	3
Protein similar to CwfJ C-terminus 2	3
Protein tyrosine phosphatase-like protein, PTPLA	3
PUA domain	3
Pumilio-family RNA binding repeat	3
Putative tRNA binding domain	3
Pyrimidine nucleoside phosphorylase C-terminal domain	3
Regulator of G protein signalling-like domain	3
Regulatory CLIP domain of proteinases	3
Repeat in ubiquitin-activating (UBA) protein	3
Repeat of unknown function (DUF1388)	3
Reprolysin (M12B) family zinc metalloprotease	3
Ribosomal protein L11, N-terminal domain	3
Ribosomal protein L11, RNA binding domain	3
Ribosomal protein L13	3
Ribosomal protein L23	3
Ribosomal protein L3	3
Ribosomal protein L32	3
Ribosomal protein L36	3
Ribosomal protein S11	3
Ribosomal protein S14p/S29e	3
Ribosomal protein S17	3
Ribosomal protein S2	3
Ribosomal protein S21	3
Ribosomal protein S5, C-terminal domain	3
Ribosome biogenesis regulatory protein (RRS1)	3
RNA cap guanine-N2 methyltransferase	3
RNA methyltransferase	3
RNA pol II accessory factor, Cdc73 family	3
RNA polymerase beta subunit	3
RNA polymerase III RPC4	3
RNA polymerase Rpb2, domain 2	3
RNA polymerase Rpb2, domain 3	3
RNA polymerase Rpb2, domain 5	3
RNA polymerase Rpb2, domain 6	3
RNA polymerase Rpb2, domain 7	3
RNA polymerase Rpb4	3
RNA polymerase Rpb8	3
RNA polymerases M/15 Kd subunit	3
RNA polymerases N / 8 kDa subunit	3
Rogdi leucine zipper containing protein	3
Rpp14/Pop5 family	3
S-adenosyl-L-homocysteine hydrolase	3
S-adenosyl-L-homocysteine hydrolase, NAD binding domain	3
Sema domain	3
Sep15/SelM redox domain	3
SGS domain	3
Shikimate kinase	3
Sister chromatid cohesion C-terminus	3
Skp1 family, tetramerisation domain	3
SlyX	3
ST7 protein	3
Starch binding domain	3
Sugar-specific transcriptional regulator TrmB	3
Syntaxin 6, N-terminal	3
TATA box binding protein associated factor (TAF)	3
TB domain	3
T-complex protein 11	3
TFIIE beta subunit core domain	3
TFIIS helical bundle-like domain	3
Thiopurine S-methyltransferase (TPMT)	3
THUMP domain	3
Thyroid hormone-inducible hepatic protein Spot 14	3
TILa domain	3
TNF(Tumour Necrosis Factor) family	3
Topoisomerase II-associated protein PAT1	3
Torsin	3
Trafficking protein Mon1	3
Transcription factor subunit Med10 of Mediator complex	3
Transcription factor TFIID (or TATA-binding protein, TBP)	3
Transcription initiation factor TFIID 23-30kDa subunit	3
Translation initiation factor 1A / IF-1	3
Translation initiation factor eIF3 subunit	3
Translation initiation factor SUI1	3
Translin family	3
Translocation protein Sec62	3
Transposase DDE domain	3
Transposase protein	3
Trehalose-phosphatase	3
Triabin	3
Tripeptidyl peptidase II N terminal	3
TrkA-N domain	3
tRNA (Guanine-1)-methyltransferase	3
tRNA intron endonuclease, catalytic C-terminal domain	3
tRNA methyl transferase	3
tRNA pseudouridine synthase	3
tRNA synthetases class I (E and Q), anti-codon binding domain	3
UbiA prenyltransferase family	3
Ubiquitin fold modifier 1 protein	3
Ubiquitin fusion degradation protein UFD1	3
Ubiquitin-activating enzyme active site	3
Uncharacterised conserved protein	3
Uncharacterised conserved protein (DUF2315)	3
Uncharacterized conserved protein (DUF2181)	3
Uncharacterized conserved protein (DUF2352)	3
Uncharacterized protein conserved in bacteria (DUF2225)	3
u-PAR/Ly-6 domain	3
Uso1 / p115 like vesicle tethering protein, head region	3
Utp14 protein	3
UTP--glucose-1-phosphate uridylyltransferase	3
Vacuolar protein sorting 55	3
Vesicle transport v-SNARE protein N-terminus	3
VHS domain	3
Viral coat protein (S domain)	3
Vps16, C-terminal region	3
WD40-like Beta Propeller Repeat	3
WH2 motif	3
Y_Y_Y domain	3
YL1 nuclear protein C-terminal domain	3
Zinc ribbon domain	3
Zinc-finger domain	3
60Kd inner membrane protein	2
6-phosphogluconate dehydrogenase, C-terminal domain	2
AARP2CN (NUC121) domain	2
Acetyl-coenzyme A transporter 1	2
Acidic fibroblast growth factor binding (FIBP)	2
Aconitase C-terminal domain	2
Aconitase family (aconitate hydratase)	2
ACT domain	2
Activator of Hsp90 ATPase homolog 1-like protein	2
Activator of Hsp90 ATPase, N-terminal	2
Acyl-coenzyme A:6-aminopenicillanic acid acyl-transferase	2
Adenosylmethionine decarboxylase	2
Alba	2
ALG6, ALG8 glycosyltransferase family	2
Alpha and gamma adaptin binding protein p34	2
Alpha-2-macroglobulin RAP, C-terminal domain	2
Alpha-2-macroglobulin RAP, N-terminal domain	2
Alpha-N-acetylglucosaminidase (NAGLU) tim-barrel domain	2
Amidohydrolase	2
Aminotransferase class IV	2
AMMECR1	2
AMOP domain	2
Angiomotin C terminal	2
Anticodon binding domain of tRNAs	2
Antimicrobial chitin binding protein tachystatin B	2
APC 15 residue motif	2
APC cysteine-rich region	2
Apolipophorin-III precursor (apoLp-III)	2
AraC-like ligand binding domain	2
Aralkyl acyl-CoA:amino acid N-acyltransferase, C-terminal region	2
Arb2 domain	2
Archease protein family (DUF101/UPF0211)	2
ARD/ARD' family	2
Arginine-tRNA-protein transferase, C terminus	2
ARP2/3 complex 16 kDa subunit (p16-Arc)	2
Arp2/3 complex, 34 kD subunit p34-Arc	2
ATP dependent DNA ligase C terminal region	2
ATP synthase	2
ATP synthase (C/AC39) subunit	2
ATP synthase (F/14-kDa) subunit	2
ATP synthase regulation protein NCA2	2
ATP synthase subunit D	2
ATPase MipZ	2
ATP-dependent Clp protease adaptor protein ClpS	2
Atrophin-1 family	2
Autophagocytosis associated protein (Atg3), N-terminal domain	2
Autophagocytosis associated protein, active-site domain	2
Autophagy protein Apg5	2
Autophagy protein Apg9	2
Autophagy-related protein 11	2
Bacterial protein of unknown function (DUF839)	2
Bacterial SH3 domain	2
Baculovirus immediate-early protein (IE-0)	2
Baculovirus major capsid protein VP39	2
BadF/BadG/BcrA/BcrD ATPase family	2
beta-N-acetylglucosaminidase	2
Bladder cancer-related protein BC10	2
BRCA2, oligonucleotide/oligosaccharide-binding, domain 3	2
BRO family, N-terminal domain	2
Bromodomain associated	2
C5HC2 zinc finger	2
Calmodulin-binding domain C0 of NMDA receptor NR1 subunit	2
Calreticulin family	2
cAMP-dependent protein kinase inhibitor	2
cAMP-regulated phosphoprotein/endosulfine conserved region	2
Capsular polysaccharide synthesis protein	2
Carbohydrate-binding module 48 (Isoamylase N-terminal domain)	2
Carbonic anhydrase	2
Cas1p-like protein	2
CDC45-like protein	2
CDC6, C terminal	2
Cell wall-associated hydrolase	2
Cell-cycle sustaining, positive selection,	2
CENP-B N-terminal DNA-binding domain	2
Central kinetochore-associated	2
CHAT domain	2
CHDCT2 (NUC038) domain	2
Chitin recognition protein	2
Chlamydia cysteine-rich outer membrane protein 3	2
Chloramphenicol phosphotransferase-like protein	2
Chromo shadow domain	2
Clathrin, heavy-chain linker	2
CLN3 protein	2
Coatomer (COPI) alpha subunit C-terminus	2
Coiled-coil domain containing protein (DUF2052)	2
Condensation domain	2
Condensin complex subunit 2	2
Copper binding periplasmic protein CusF	2
Copper type II ascorbate-dependent monooxygenase, C-terminal domain	2
Copper type II ascorbate-dependent monooxygenase, N-terminal domain	2
Coronavirus RPol N-terminus	2
CpG binding protein zinc finger C terminal domain	2
CPL (NUC119) domain	2
CrcB-like protein	2
CRM1 C terminal	2
CT20 family	2
C-terminal proteasome-interacting domain of thioredoxin-like	2
CUB-like domain	2
Cupin	2
CutC family	2
Cutinase	2
CXXC zinc finger domain	2
Cyclin-dependent kinase regulatory subunit	2
Cytochrome B561, N terminal	2
Cytochrome c oxidase subunit Va	2
Cytochrome c oxidase subunit VIa	2
Cytochrome c oxidase subunit VIIc	2
Cytoplasmic Fragile-X interacting family	2
Dak1 domain	2
DAK2 domain	2
DBF zinc finger	2
DDT domain	2
Dedicator of cytokinesis	2
Deoxyhypusine synthase	2
Deoxynucleoside kinase	2
DIRP	2
DM DNA binding domain	2
DMAP1-binding Domain	2
DNA / pantothenate metabolism flavoprotein	2
DNA mismatch repair protein, C-terminal domain	2
DNA photolyase	2
DNA polymerase alpha/epsilon subunit B	2
DNA polymerase III, delta subunit	2
DnaB-like helicase C terminal domain	2
Docking domain of Afi1 for Arf3 in vesicle trafficking	2
Dolichyl-phosphate-mannose-protein mannosyltransferase	2
Domain of Unknown Function (DUF1086)	2
Domain of Unknown Function (DUF1087)	2
Domain of unknown function (DUF1736)	2
Domain of unknown function (DUF1741)	2
Domain of unknown function (DUF1832)	2
Domain of unknown function (DUF1899)	2
Domain of unknown function (DUF1916)	2
Domain of unknown function (DUF1963)	2
Domain of unknown function (DUF1977)	2
Domain of unknown function (DUF1982)	2
Domain of unknown function (DUF23)	2
Domain of unknown function (DUF298)	2
Domain of unknown function (DUF3350)	2
Domain of unknown function (DUF3449)	2
Domain of unknown function (DUF3497)	2
Domain of unknown function (DUF3508)	2
Domain of unknown function (DUF3512)	2
Domain of unknown function (DUF3513)	2
Domain of unknown function (DUF3535)	2
Domain of unknown function (DUF3548)	2
Domain of unknown function (DUF3819)	2
Domain of Unknown Function (DUF3856)	2
Domain of unknown function (DUF814)	2
Domain of unknown function DUF87	2
Domain of unknown function UPF0086	2
Doublesex dimerisation domain	2
Double-stranded DNA-binding domain	2
Drought induced 19 protein (Di19)	2
dUTPase	2
Dynein light intermediate chain (DLIC)	2
EAP30/Vps36 family	2
EF-hand	2
Electron transfer DM13	2
Electron transfer flavoprotein domain	2
ELMO/CED-12 family	2
Elongation factor TS	2
Endoribonuclease L-PSP	2
Enhancer of rudimentary	2
Epoxide hydrolase N terminus	2
ESAG protein	2
Eukaryotic and archaeal DNA primase small subunit	2
Eukaryotic and archaeal DNA primase, large subunit	2
Eukaryotic DNA topoisomerase I, catalytic core	2
Eukaryotic DNA topoisomerase I, DNA binding fragment	2
Eukaryotic protein of unknown function (DUF2003)	2
Eukaryotic protein of unknown function (DUF872)	2
Eukaryotic translation initiation factor 3 subunit 7 (eIF-3)	2
Eukaryotic translation initiation factor 3 subunit 8 N-terminus	2
Eukaryotic translation initiation factor 3 subunit G	2
Eukaryotic translation initiation factor 4E binding protein (EIF4EBP)	2
Excisionase from transposon Tn916	2
Exocyst complex component Sec10	2
Exocyst complex component Sec6	2
[truncated: 1,708 more rows]
